# Supplementary material
Source: PubMed Central journal article supplement (PMC4018131)
Supplement: ml100240z_si_002.pdf [file ml100240z_si_002.pdf]

## **Supplementary Information**

### **Extracting SAR Information from a Large Collection of Anti-Malarial Screening**

#### **Hits by NSG-SPT Analysis**

Mathias Wawer and Jürgen Bajorath

#### **Supplementary Figures S1-S5**

#### **Supplementary Table S1**

## Supplementary Figure Legends

### **Figure S1. Selected NSG regions after removal of known anti-malarial chemotypes.**

Three prominent local SAR regions that are highlighted in the NSG in Figure 3 of the manuscript are shown in detail.

**Figure S2. Corresponding SPTs.** For each of the local NSG regions displayed in Figure S1, the corresponding SPT is shown. Numbers correspond to Figure S1. Selected compounds are shown and informative SAR patterns are highlighted.

**Figure S3. Complete SPT.** The complete SPT for region 3 in Figure S2 is shown.

**Figure S4. Cluster and potency distribution.** Each cluster obtained by k-means clustering ( $k=60$ ) of the reduced GSK data set is represented by a boxplot that reports the distribution of potency values of the members. On the left axis, the cluster size, i.e. the number of compounds a cluster contains, is reported. The clusters are ordered by decreasing median potency from the top to the bottom, as indicated by the axis on the right (cluster rank). Potency values are reported on the horizontal axis as  $pXC_{50}$  values. Selected clusters mapped in Figure S5 are colored accordingly.

**Figure S5. NSG analysis and independent compound clustering.** The NSG corresponding to Figure 3 of the manuscript is displayed without potency-based coloring. Eight compound clusters obtained from standard k-means clustering ( $k=60$ ) are highlighted. Four clusters with highest median potency were selected together with four others that each contained one of the four most potent remaining compounds.

Figure S1

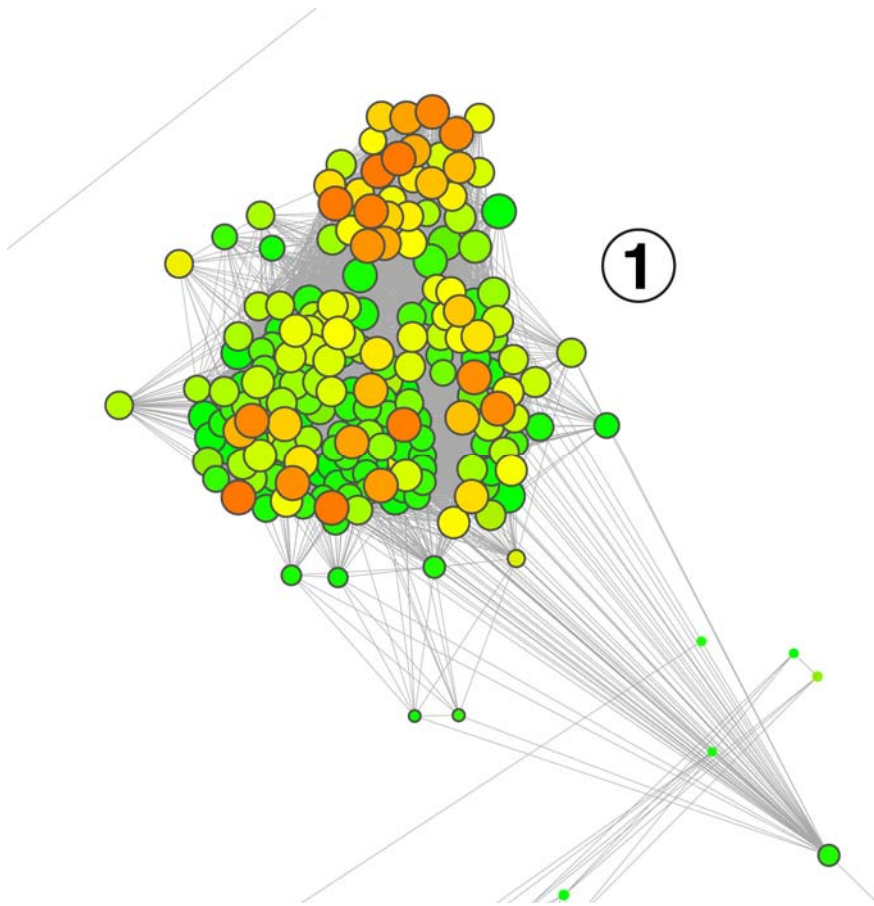

Figure S1 – continued

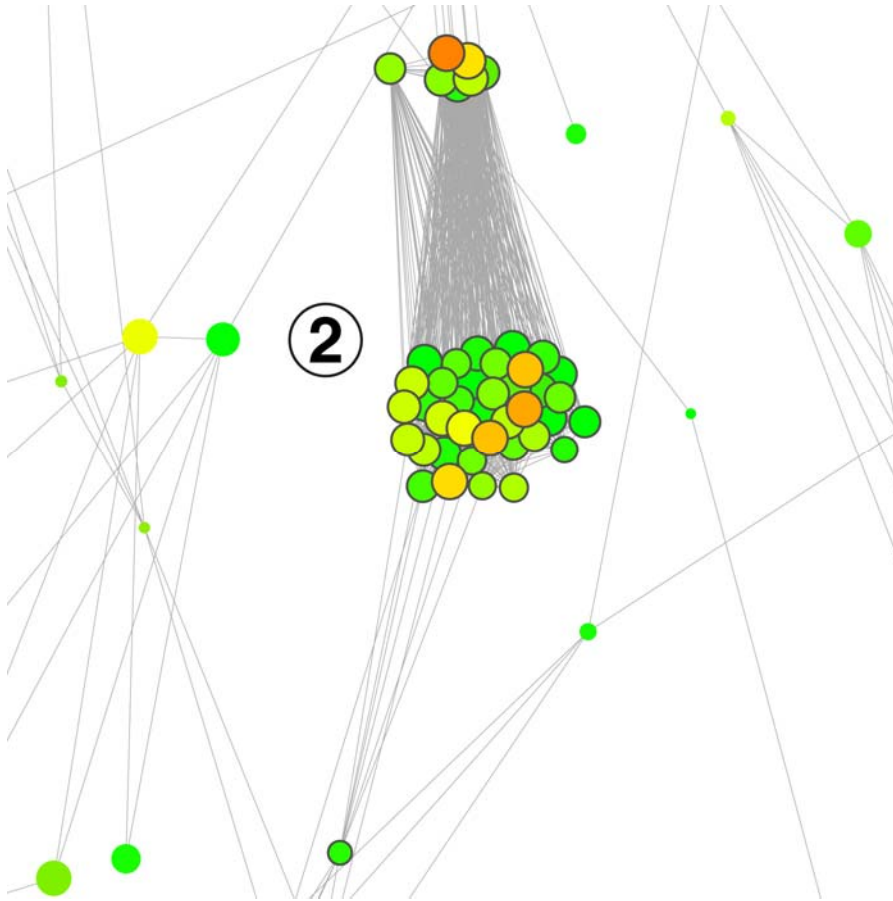

Figure S1 – continued

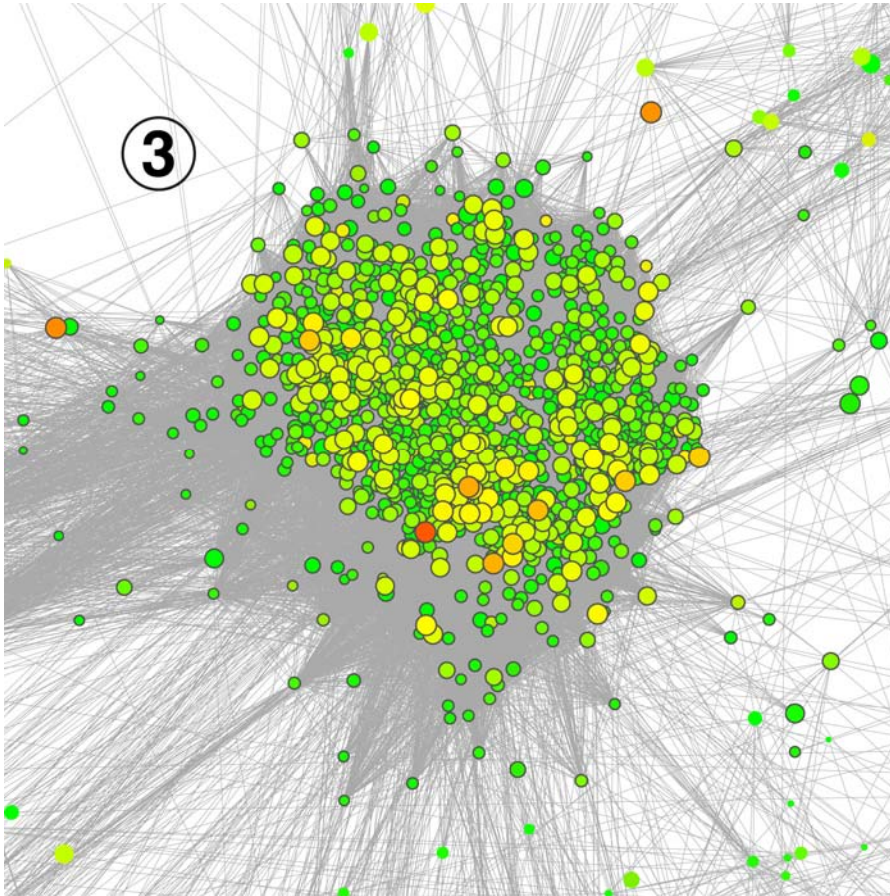

Figure S2

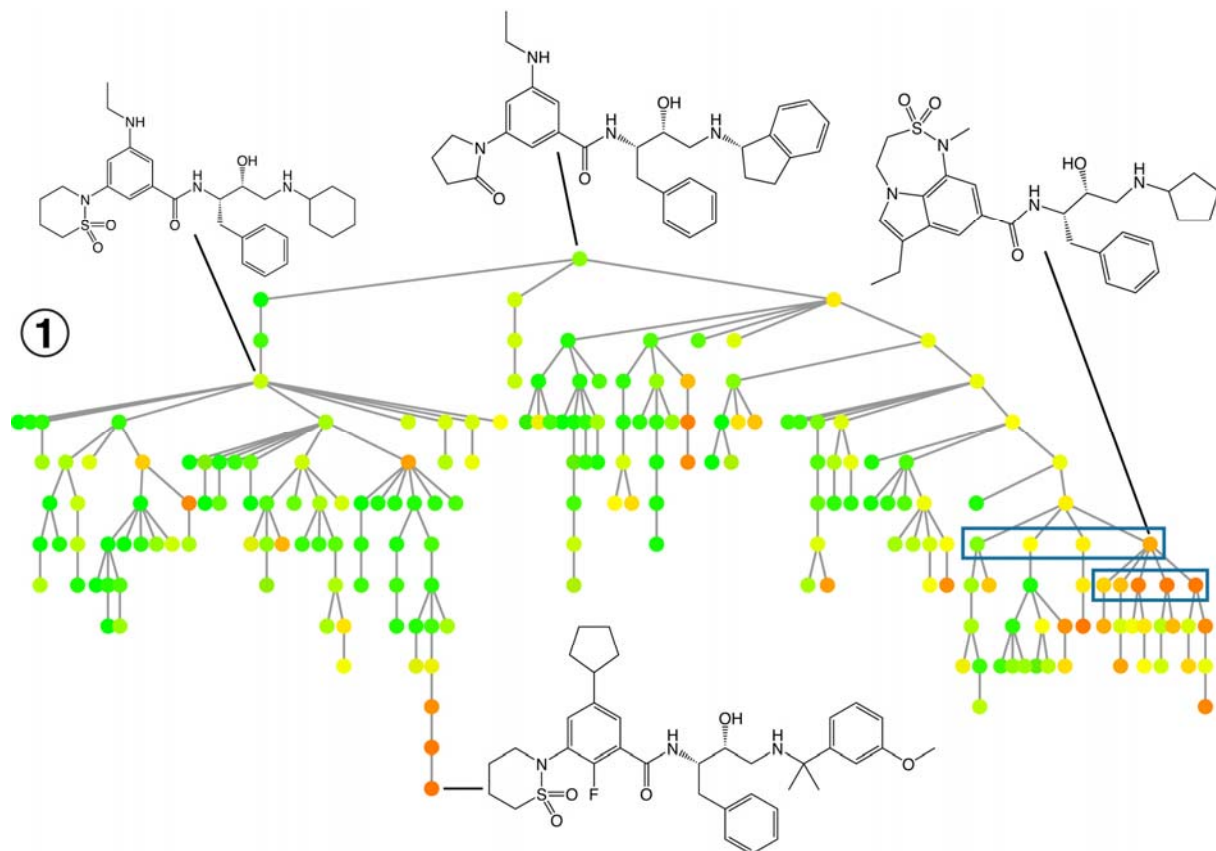

Figure S2 – continued

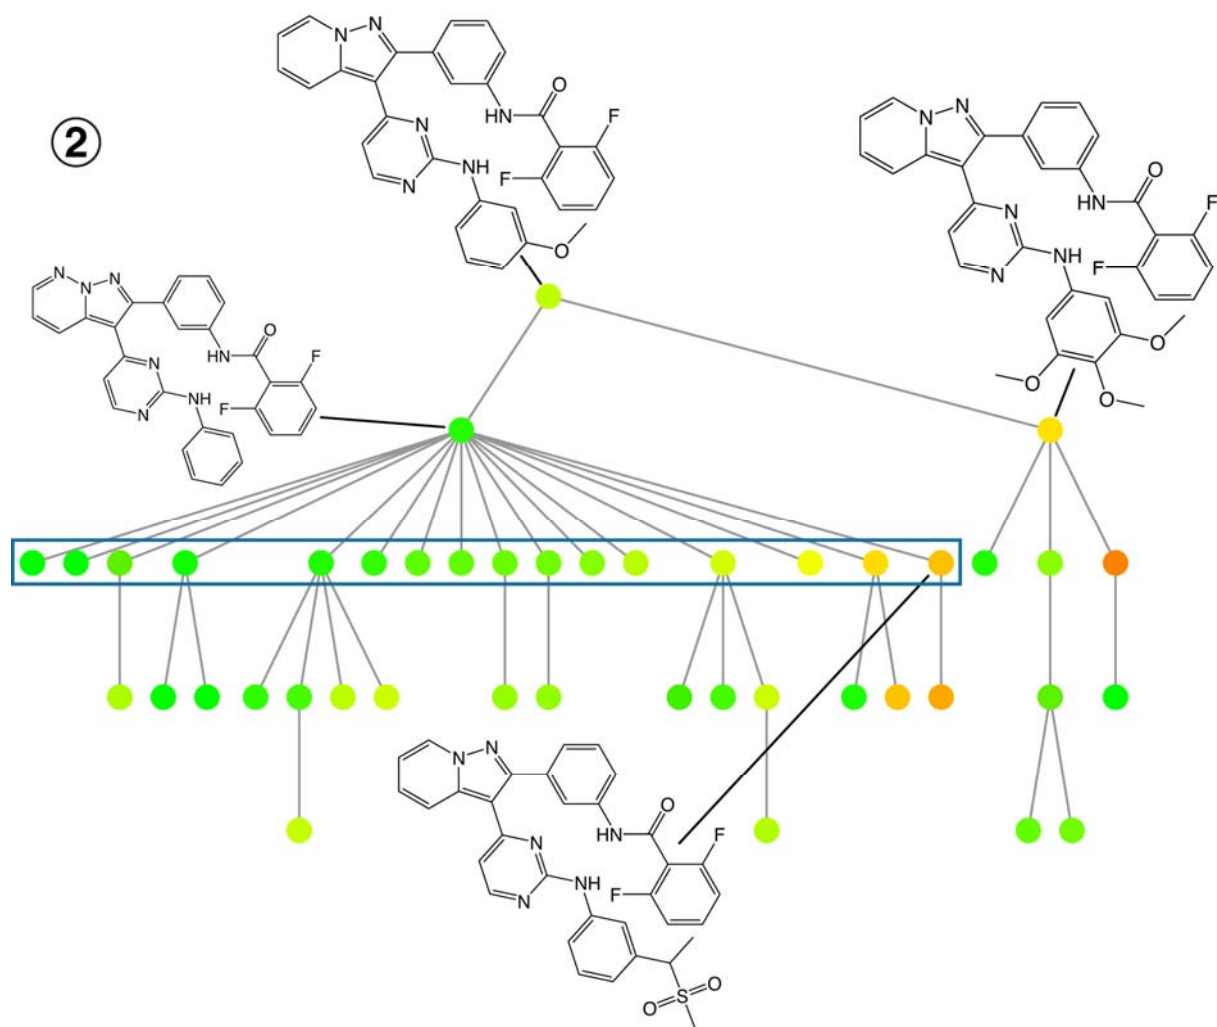

Figure S2– continued

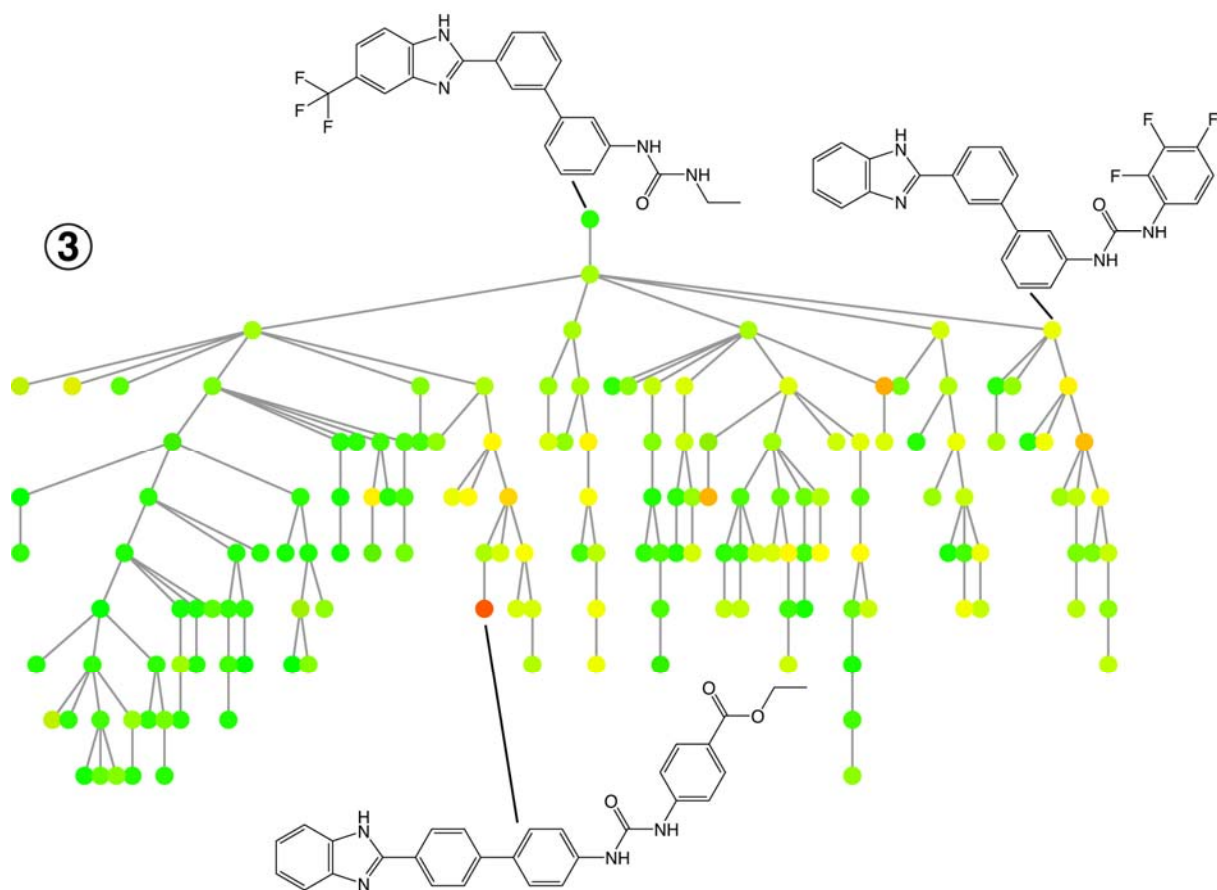



Figure S3

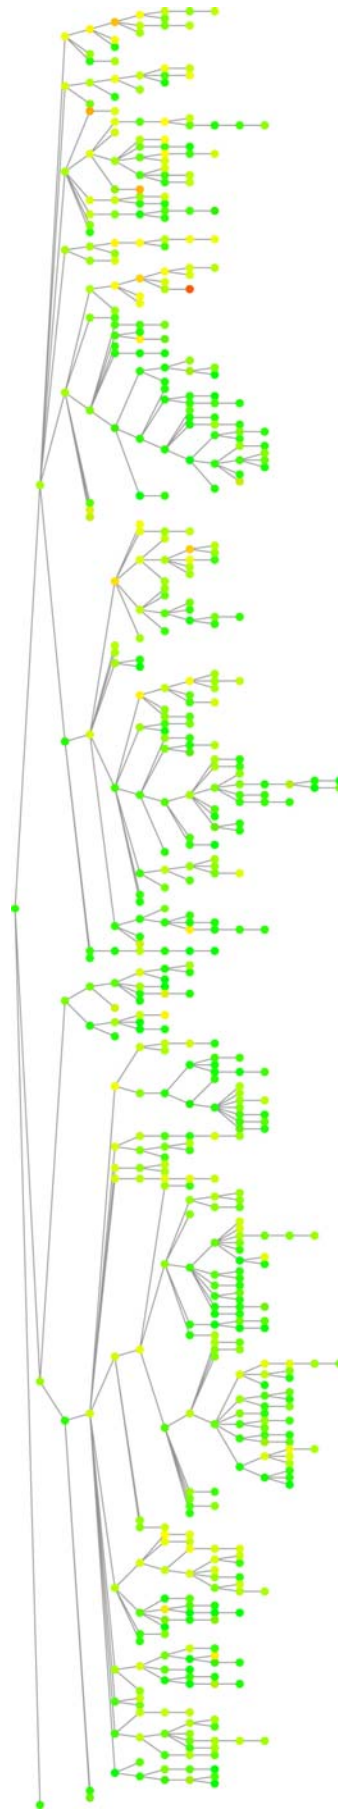

Figure S4

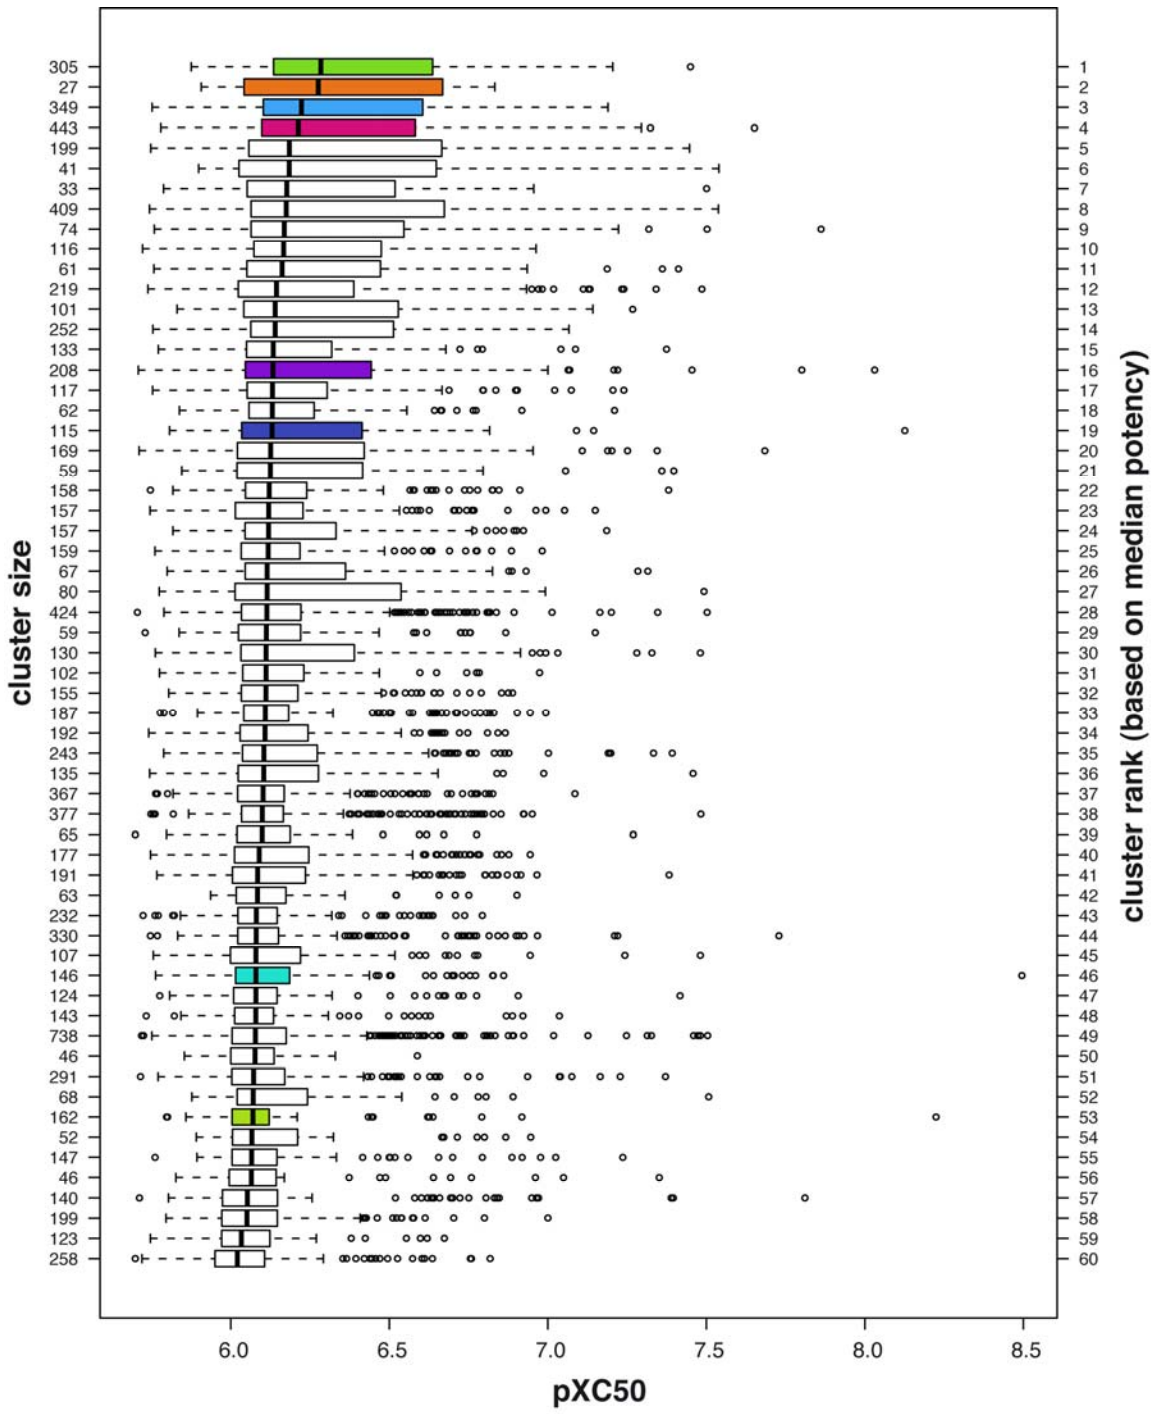

Figure S5

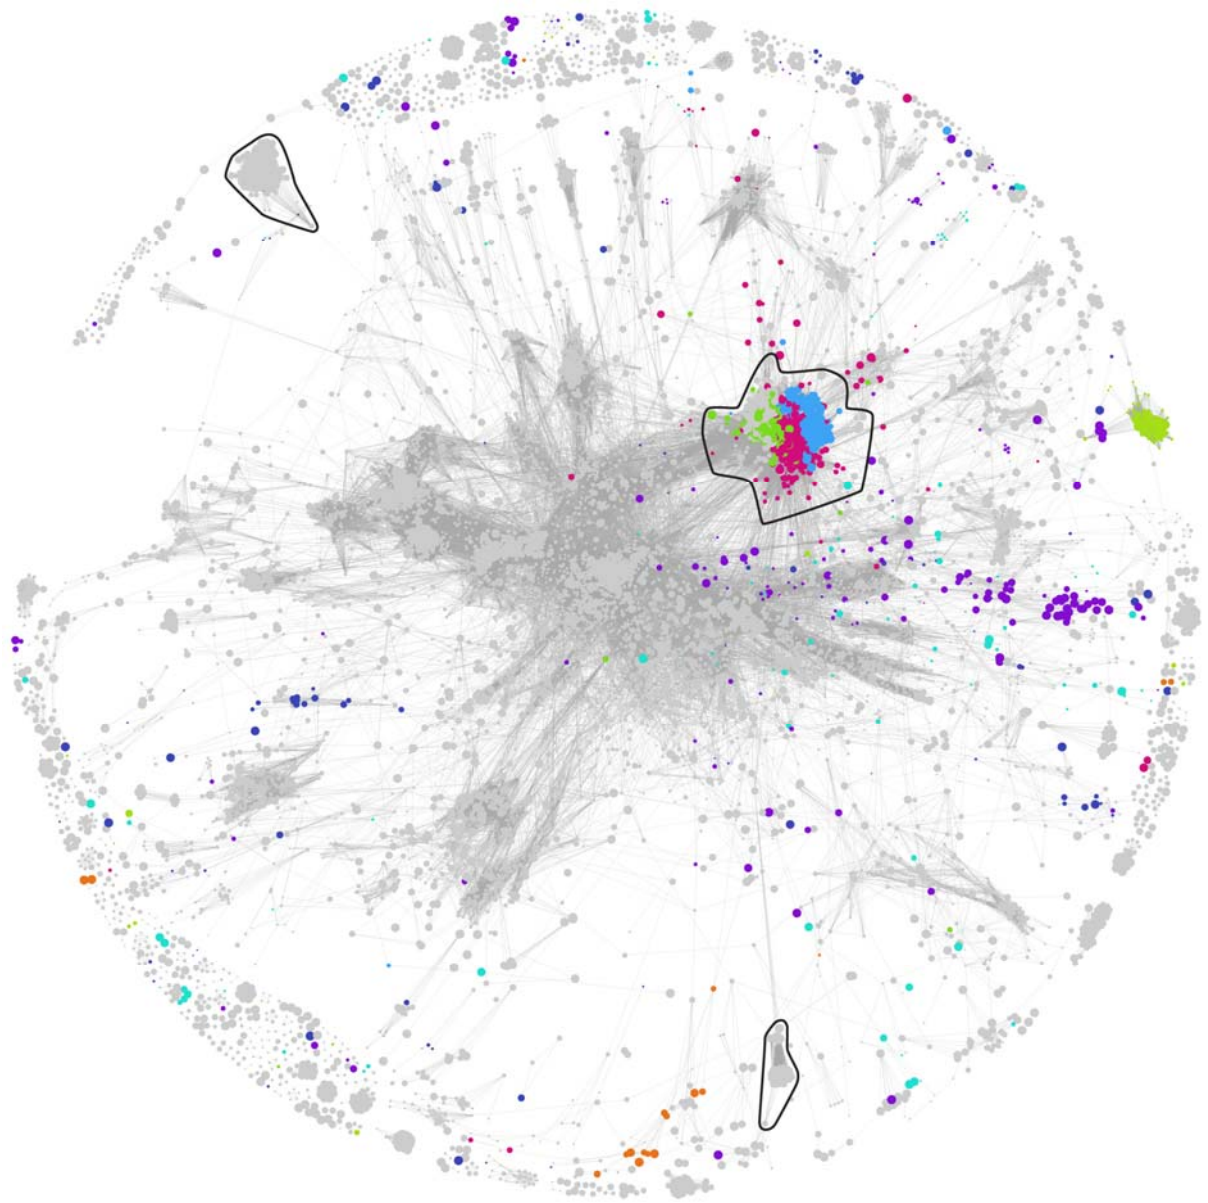

**Supplementary Table S1.** Compound IDs, SMILES strings, and potency values for cluster 1 (a) and 2 (b) from Figure 2a and cluster 1 (c), 2 (d) and 3 (e) from Figure 3a.

(a)

| COMPOUND_ID | CANONICAL_SMILES                                              | pXC50_3D7 |
|-------------|---------------------------------------------------------------|-----------|
| 286520      | <chem>c1cc2c(c3c1[nH]cc3)c(nc(n2)N)N</chem>                   | 5.9664    |
| 541129      | <chem>CC(C)C(=O)n1c2ccc3c(c2cn1)c(nc(n3)N)N</chem>            | 5.98663   |
| 528514      | <chem>COCn1ccc2c1ccc3c2c(nc(n3)N)N</chem>                     | 6.00452   |
| 541638      | <chem>CCCCCNc1c(nc2c(nc(nc2n1)N)N)c3ccccc3</chem>             | 6.02035   |
| 525503      | <chem>c1ccc(cc1)COc2ccc(cc2)Cn3ccc4c3ccc5c4c(nc(n5)N)N</chem> | 6.03033   |
| 42380       | <chem>c1cc2c(c3c1CCC3)c(nc(n2)N)N</chem>                      | 6.03259   |
| 287128      | <chem>Cn1ccc2c1ccc3c2c(nc(n3)N)N</chem>                       | 6.04485   |
| 538940      | <chem>c1cc2c(ccn2CCCC3CCNC3)c4c1nc(nc4N)N</chem>              | 6.04695   |
| 525201      | <chem>Cn1c2ccc3c(c2cc1c4cccc4)c(nc(n3)N)N</chem>              | 6.0518    |
| 542588      | <chem>CC(C)(C)c1ccc(cc1)c2c(nc(nn2)N)N</chem>                 | 6.06445   |
| 537098      | <chem>CC(C)(C)c1ccc(cc1)Cc2ccc3c2c(nc(n3)N)N</chem>           | 6.07888   |
| 540873      | <chem>c1ccc(cc1)Cc2ccc3c2c(nc(n3)N)N</chem>                   | 6.08196   |
| 530471      | <chem>CC(C)C(C(C)C)C(=O)n1cc2c(n1)ccc3c2c(nc(n3)N)N</chem>    | 6.10255   |
| 532155      | <chem>c1cn(c2c1nc(nc2N)N)Cc3cc4c(cc3Cl)OCO4</chem>            | 6.11644   |
| 527111      | <chem>c1ccc2c(c1)ccc3c2c(nc(n3)N)N</chem>                     | 6.12529   |
| 532618      | <chem>CC(C)CNc1c2c3ccn(c3ccc2nc(n1)N)CC(C)C</chem>            | 6.18791   |
| 529735      | <chem>CC(C)C(C(C)C)C(=O)n1c2ccc3c(c2cn1)c(nc(n3)N)N</chem>    | 6.18829   |
| 528778      | <chem>CN(C)c1ccc2c(c1Cl)c(nc(n2)N)N</chem>                    | 6.32359   |
| 527483      | <chem>c1cc(cnc1)Cn2cc3c(n2)ccc4c3c(nc(n4)N)N</chem>           | 6.44927   |
| 535016      | <chem>CC(C)n1c2ccc3c(c2cn1)c(nc(n3)N)N</chem>                 | 6.47789   |
| 534667      | <chem>CCn1ccc2c1ccc3c2c(nc(n3)N)N</chem>                      | 6.50506   |
| 540658      | <chem>CC(C)Cn1cc2c(n1)ccc3c2c(nc(n3)N)N</chem>                | 6.519     |
| 541074      | <chem>Cc1ccc(c(c1)Cn2ccc3c2c(nc(n3)N)N)C</chem>               | 6.52171   |
| 540581      | <chem>c1cc2c(c3c1nn(c3)C4CCCC4)c(nc(n2)N)N</chem>             | 6.54287   |
| 532347      | <chem>COCOCOCOCn1ccc2c1ccc3c2c(nc(n3)N)N</chem>               | 6.58057   |
| 528575      | <chem>c1ccc(cc1)Cn2cc3c(n2)ccc4c3c(nc(n4)N)N</chem>           | 6.6676    |
| 528642      | <chem>COCn1ccc2c1ccc3c2c(nc(n3)N)N</chem>                     | 6.66983   |
| 537662      | <chem>c1cc2c(ccn2CC3CC3)c4c1nc(nc4N)N</chem>                  | 6.67607   |
| 528259      | <chem>c1ccc(cc1)CN(Cc2cccc2)c3ccc4c(c3Cl)c(nc(n4)N)N</chem>   | 6.71604   |
| 539385      | <chem>CCOCn1c2ccc3c(c2cc1c4cccc4)c(nc(n3)N)N</chem>           | 6.72947   |
| 533235      | <chem>CN(C)S(=O)(=O)n1c2ccc3c(c2cn1)c(nc(n3)N)N</chem>        | 6.74942   |
| 542589      | <chem>CCC(C)Oc1ccc2c(c1Cl)c(nc(n2)N)N</chem>                  | 6.7525    |
| 528011      | <chem>CCN(C)C(=O)n1c2ccc3c(c2cn1)c(nc(n3)N)N</chem>           | 6.75438   |
| 539206      | <chem>CC(C)Cn1c2ccc3c(c2cn1)c(nc(n3)N)N</chem>                | 6.79777   |
| 530771      | <chem>c1cc2c(ccn2CCCF)c3c1nc(nc3N)N</chem>                    | 6.8259    |
| 529884      | <chem>CCCCCn1ccc2c1ccc3c2c(nc(n3)N)N</chem>                   | 6.82753   |
| 539074      | <chem>c1cc2c(ccn2C3CCCC=C3)c4c1nc(nc4N)N</chem>               | 6.88094   |
| 528010      | <chem>c1cc2c(ccn2C3CCCC3)c4c1nc(nc4N)N</chem>                 | 6.90963   |
| 529425      | <chem>c1cc2c(ccn2CCCCO)c3c1nc(nc3N)N</chem>                   | 6.93012   |
| 526774      | <chem>CC(C)(C)c1ccc(cc1)c2cc3c([nH]2)ccc4c3c(nc(n4)N)N</chem> | 6.94675   |
| 538111      | <chem>c1cc2c(ccn2CCCC(F)(F)F)c3c1nc(nc3N)N</chem>             | 7.0087    |
| 537331      | <chem>c1cc2c(c3c1nn(c3)S(=O)(=O)N4CCCC4)c(nc(n2)N)N</chem>    | 7.0152    |
| 525834      | <chem>c1ccc(cc1)Cn2cnc3c2ccc4c3c(nc(n4)N)N</chem>             | 7.02951   |
| 286974      | <chem>Cc1cc2c(n1C)ccc3c2c(nc(n3)N)N</chem>                    | 7.04525   |
| 528332      | <chem>CC(C)c1cc2c(o1)ccc3c2c(nc(n3)N)N</chem>                 | 7.06696   |
| 535950      | <chem>CCC(CC)n1cc2c(n1)ccc3c2c(nc(n3)N)N</chem>               | 7.08923   |
| 536161      | <chem>CCN1cc2c(n1)ccc3c2c(nc(n3)N)N</chem>                    | 7.08965   |
| 532174      | <chem>c1cc(c(c2c1nc(nc2N)N)Cl)N3CCOCC3</chem>                 | 7.11408   |
| 524537      | <chem>C=CCn1ccc2c1ccc3c2c(nc(n3)N)N</chem>                    | 7.15499   |
| 541795      | <chem>CC(C)Cn1ccc2c1ccc3c2c(nc(n3)NC(=O)C)N</chem>            | 7.15732   |
| 286288      | <chem>CCc1cc2c(n1C(CC)CC)ccc3c2c(nc(n3)N)N</chem>             | 7.19591   |

|        |                                                |         |
|--------|------------------------------------------------|---------|
| 537049 | CCN(CC)S(=O)(=O)n1c2ccc3c(c2cn1)c(nc(n3)N)N    | 7.26076 |
| 529019 | CC(CC=C)n1c2ccc3c(c2cn1)c(nc(n3)N)N            | 7.30066 |
| 526222 | c1ccc(cc1)c2ccc(cc2)Cn3ccc4c3ccc5c4c(nc(n5)N)N | 7.3159  |
| 524655 | c1cc(cnc1)Cn2c3ccc4c(c3cn2)c(nc(n4)N)N         | 7.3174  |
| 287211 | CCCc1cc2c(n1CC)ccc3c2c(nc(n3)N)N               | 7.32144 |
| 537510 | CCCC(C)n1ccc2c1ccc3c2c(nc(n3)N)N               | 7.32219 |
| 539357 | CN(C)S(=O)(=O)n1ccc2c1ccc3c2c(nc(n3)N)N        | 7.3377  |
| 286620 | CC(C)c1cc2c([nH]1)ccc3c2c(nc(n3)N)N            | 7.40937 |
| 525411 | CC(C)n1cc2c(n1)ccc3c2c(nc(n3)N)N               | 7.43237 |
| 528333 | CC(C)Cn1ccc2c1ccc3c2c(nc(n3)N)N                | 7.46604 |
| 532592 | CCN(CC)c1ccc2c(c1Cl)c(nc(n2)N)N                | 7.51005 |
| 524954 | c1cc2c(cnn2S(=O)(=O)N3CCCC3)c4c1nc(nc4N)N      | 7.73087 |
| 288766 | CCc1cc2c(n1C(C)(C)C)ccc3c2c(nc(n3)N)N          | 7.89615 |
| 287314 | CCn1c2ccc3c(c2cc1C(C)C)c(nc(n3)N)N             | 7.90606 |
| 285858 | CCc1cc2c(n1CC)ccc3c2c(nc(n3)N)N                | 7.98536 |
| 286070 | COc1cc(cc(c1OC)OC)Cn2ccc3c2ccc4c3c(nc(n4)N)N   | 8.02946 |
| 533981 | Cc1c(ccc2c1c(nc(n2)N)N)C(C)(C)C                | 8.059   |
| 285857 | Cc1cc2c(n1C(C)C)ccc3c2c(nc(n3)N)N              | 8.06976 |
| 536359 | c1ccnc(c1)Cn2ccc3c2ccc4c3c(nc(n4)N)N           | 8.08039 |
| 527334 | Cc1cccc(c1)Cn2ccc3c2ccc4c3c(nc(n4)N)N          | 8.13378 |
| 529362 | c1cc(ccc1Cn2ccc3c2ccc4c3c(nc(n4)N)N)F          | 8.1851  |
| 533945 | CCC(C)(CC)C(=O)n1c2ccc3c(c2cn1)c(nc(n3)N)N     | 8.22209 |
| 541531 | CCCC(CC)n1ccc2c1ccc3c2c(nc(n3)N)N              | 8.22792 |
| 531443 | CCC(CC)n1c2ccc3c(c2cc1COC)c(nc(n3)N)N          | 8.25412 |
| 524705 | CCC(C)(C)c1ccc2c(c1C)c(nc(n2)N)N               | 8.28276 |
| 524702 | CCCC(CCC)n1ccc2c1ccc3c2c(nc(n3)N)N             | 8.30969 |
| 529823 | c1cc(ccc1Cn2ccc3c2ccc4c3c(nc(n4)N)N)C#N        | 8.48242 |
| 524429 | c1ccc2c(c1)cccc2Cn3ccc4c3ccc5c4c(nc(n5)N)N     | 8.49485 |
| 524869 | CCC(C(C)C)n1ccc2c1ccc3c2c(nc(n3)N)N            | 8.49485 |
| 541564 | Cc1cccc1Cn2ccc3c2ccc4c3c(nc(n4)N)N             | 8.49485 |
| 524987 | c1cc(ccc1Cn2ccc3c2ccc4c3c(nc(n4)N)N)Br         | 8.49485 |
| 528917 | c1cc(ccc1Cn2ccc3c2ccc4c3c(nc(n4)N)N)Cl         | 8.49485 |
| 288654 | CCC(C)(C)n1c(cc2c1ccc3c2c(nc(n3)N)N)C          | 8.49485 |
| 529873 | c1cc(cc(c1F)Cn2ccc3c2ccc4c3c(nc(n4)N)N         | 8.49485 |
| 286710 | Cc1ccc(cc1)Cn2ccc3c2ccc4c3c(nc(n4)N)N          | 8.49485 |
| 530049 | COc1ccc(cc1)Cn2ccc3c2ccc4c3c(nc(n4)N)N         | 8.49485 |
| 540294 | c1ccc(cc1)Cn2ccc3c2ccc4c3c(nc(n4)N)N           | 8.49485 |
| 530929 | COc1cccc(c1)Cn2ccc3c2ccc4c3c(nc(n4)N)N         | 8.49485 |
| 531260 | COc1ccc(cc1OC)Cn2c3ccc4c(c3cn2)c(nc(n4)N)N     | 8.49485 |
| 286631 | CCC(CC)n1c(cc2c1ccc3c2c(nc(n3)N)N)C            | 8.49485 |
| 286526 | CC(C)n1c2ccc3c(c2cc1C(C)C)c(nc(n3)N)N          | 8.49485 |
| 534641 | c1cc2c(cc1Cn3ccc4c3ccc5c4c(nc(n5)N)N)OCO2      | 8.49485 |
| 535738 | c1cc2c(ccn2Cc3cc4c(cc3Cl)OCO4)c5c1nc(nc5N)N    | 8.49485 |
| 286068 | CCCc1cc2c(n1C(CC)CC)ccc3c2c(nc(n3)N)N          | 8.49485 |
| 285940 | CCc1cc2c(n1C(C)CC)ccc3c2c(nc(n3)N)N            | 8.49485 |

(b)

| COMPOUND_ID | CANONICAL_SMILES                                                            | pXC50_3D7 |
|-------------|-----------------------------------------------------------------------------|-----------|
| 541505      | <chem>Cc1ccc(cc1)S(=O)(=O)NC2=NC(=N)N(C(N2)(C)C)OCc3ccc(c(c3)Cl)Cl</chem>   | 5.94494   |
| 528127      | <chem>c1ccc(cc1)Cc2ccc(cc2)OCCON3C(=N)N=C(NC34CCCCC4)N</chem>               | 5.94881   |
| 542722      | <chem>COc1ccc(cc1OC)C2N=C(N=C(N2c3ccc(cc3)Cl)N)N</chem>                     | 5.99961   |
| 524629      | <chem>CN(C)c1ccc(cc1)N2C(=NC(=NC23CCCC3)N)N</chem>                          | 6.02924   |
| 528799      | <chem>CC1(N=C(N=C(N1OCCCOc2cc(c(cc2Cl)Cl)Cl)N)NC(=O)NC)C</chem>             | 6.02927   |
| 531153      | <chem>CCCC1N=C(N=C(N1c2cccc2)N)N</chem>                                     | 6.08485   |
| 536935      | <chem>CCC1(N=C(N=C(N1c2cccc2)N)N)C</chem>                                   | 6.10138   |
| 526121      | <chem>CCCC1N=C(N=C(N1c2cccc(c2)N(=O)=O)N)N</chem>                           | 6.11908   |
| 534155      | <chem>Cc1cccc(c1C)N2C(=NC(=NC2(C)C)N)N</chem>                               | 6.11982   |
| 531914      | <chem>CC1(NC(=NC(=N)N1OCc2ccc3cccc3c2CON4C(=N)N=C(NC4(C)C)N)N)C</chem>      | 6.17833   |
| 528772      | <chem>c1ccc(cc1)C=CC2N=C(N=C(N2OCCCCCON3C(N=C(N=C3N)N)C=Cc4cccc4)N)N</chem> | 6.21124   |
| 532523      | <chem>CC1(N=C(N=C(N1OCc2ccc(c(c2)Cl)Cl)NC(=O)NC)NC(=O)NC)C</chem>           | 6.22142   |
| 530768      | <chem>CCCC1N=C(N=C(N1c2cccc(c2)C(F)(F)F)N)N</chem>                          | 6.22594   |
| 536333      | <chem>CCCCCCCOc1ccc(cc1)N2C(=NC(=NC2(C)C)N)N</chem>                         | 6.29911   |
| 536917      | <chem>CCCOc1ccc(cc1)N2C(=NC(=NC2(C)C)N)N</chem>                             | 6.31205   |
| 532909      | <chem>c1cc(ccc1N2C(=NC(=NC23CCCC3)N)N)Cl</chem>                             | 6.38345   |
| 534963      | <chem>CCCCCOc1ccc(cc1)N2C(=NC(=NC2(C)C)N)N</chem>                           | 6.46287   |
| 538554      | <chem>CC1(N=C(N=C(N1c2ccc(cc2)Oc3cccc3)N)N)C</chem>                         | 6.46778   |
| 534651      | <chem>CC1(N=C(N=C(N1c2cccc2)N)N)C</chem>                                    | 6.4852    |
| 524411      | <chem>CC1(N=C(N=C(N1c2ccc(c(c2)OC)OC)N)N)C</chem>                           | 6.50728   |
| 542097      | <chem>c1ccc(cc1)C2N=C(N=C(N2c3cccc3)N)N</chem>                              | 6.53178   |
| 541825      | <chem>CCOC(=O)NC1=NC(N(C(=N1)NC(=O)OCC)OCc2ccc(c(c2)Cl)Cl)(C)C</chem>       | 6.55556   |
| 529733      | <chem>CC1(NC(=NC(=N)N1OCc2nc(nc(n2)Nc3cccc3)N)N)C</chem>                    | 6.56294   |
| 524889      | <chem>CCOc1ccc(cc1)N2C(=NC(=NC2(C)C)N)N</chem>                              | 6.58655   |
| 530434      | <chem>CC1CCC2(CC1)N=C(N=C(N2OCc3cc4cccc4c5c3cccc5)N)N</chem>                | 6.61493   |
| 542654      | <chem>CCCC1N=C(N=C(N1c2ccc(cc2)OC)N)N</chem>                                | 6.63037   |
| 541538      | <chem>CC1(N=C(N=C(N1c2ccc(cc2)N(=O)=O)N)N)C</chem>                          | 6.63052   |
| 542586      | <chem>CC1(NC(=NC(=N)N)NOCc2ccc(c(c2)Cl)Cl)C</chem>                          | 6.64174   |
| 535665      | <chem>CC1(NC(=NC(=N)N1OCCO)N)C</chem>                                       | 6.65584   |
| 529924      | <chem>CC1CCC2(CC1)N=C(N=C(N2OCc3ccc(c4c3cccc4)Br)N)N</chem>                 | 6.66602   |
| 524640      | <chem>CCCCOc1ccc(cc1)N2C(=NC(=NC2(C)C)N)N</chem>                            | 6.66824   |
| 535018      | <chem>CCCCCOc1ccc(cc1)N2C(=NC(=NC2(C)C)N)N</chem>                           | 6.68877   |
| 524477      | <chem>c1cc(c(cc1CON2CNC(=NC2=N)N)Cl)Cl</chem>                               | 6.71183   |
| 538465      | <chem>CC1(N=C(N=C(N1O)N)N)C</chem>                                          | 6.71562   |
| 537305      | <chem>C=CCc1cc(ccc1OCCCOc2c(nc(nc2N)N)N)Br</chem>                           | 6.71614   |
| 526873      | <chem>CC1(N=C(N=C(N1c2cc(c(cc2Cl)Cl)Cl)N)N)C</chem>                         | 6.74172   |
| 537797      | <chem>CCOC(=O)NC1=NC(N(C(=N1)NC(=O)OCC)OCc2cccc3c2ccc4c3cccc4)(C)C</chem>   | 6.76338   |
| 531957      | <chem>CC1(NC(=NC(=N)N1OCCNCc2ccc(cc2)Cl)N)C</chem>                          | 6.79588   |
| 539955      | <chem>CCC1(N=C(N=C(N1c2ccc(cc2)Cl)N)N)C</chem>                              | 6.79729   |
| 537628      | <chem>C1CCC(CC1)CON2C(=N)N=C(NC23CCCC3)N</chem>                             | 6.81061   |
| 528062      | <chem>CC1CCC2(CC1)NC(=NC(=N)N2OCCCCCCCCO)N</chem>                           | 6.83241   |
| 527586      | <chem>c1ccc(cc1)CC2N=C(N=C(N2c3ccc(cc3)Cl)N)N</chem>                        | 6.86299   |
| 530232      | <chem>COc1ccc(cc1OC)C2N=C(N=C(N2OCc3cccc3)N)N</chem>                        | 6.87679   |
| 528819      | <chem>CCCCC1ccc(cc1)N2C(=NC(=NC2(C)C)N)N</chem>                             | 6.88122   |
| 541363      | <chem>CC1(N=C(N=C(N1OCc2cc3cccc3cc2CON4C(=NC(=NC4(C)C)N)N)N)C</chem>        | 6.89907   |
| 526273      | <chem>CCOC(=O)NC1=NC(N(C(=N1)NC(=O)OCC)OCCCOc2ccc(cc2C)C)(C)C</chem>        | 6.901     |
| 536483      | <chem>CC1(N=C(N=C(N1c2cccc(c2)I)N)N)C</chem>                                | 6.90132   |
| 535386      | <chem>CC1(N=C(N=C(N1c2ccc(cc2)OC)N)N)C</chem>                               | 6.94634   |
| 526831      | <chem>CCCC1N=C(N=C(N1c2ccc(cc2)C)N)N</chem>                                 | 7.02152   |
| 526798      | <chem>CC1(N=C(N=C(N1c2ccc(c(c2)Cl)Oc3ccc(cc3)Cl)N)N)C</chem>                | 7.10294   |
| 531976      | <chem>c1ccc(cc1)CCC2N=C(N=C(N2c3cccc3)N)N</chem>                            | 7.1131    |
| 524860      | <chem>CCCC1N=C(N=C(N1c2ccc(c(c2)C)C)N)N</chem>                              | 7.13328   |
| 532784      | <chem>CCCC1N=C(N=C(N1c2ccc(cc2)CC)N)N</chem>                                | 7.17441   |
| 527826      | <chem>CC1(N=C(N=C(N1OCCCON2C(=NC(=NC2(C)C)N)N)N)C</chem>                    | 7.18073   |
| 529009      | <chem>CC1(N=C(N=C(N1c2ccc(cc2)OCC#C)N)N)C</chem>                            | 7.18204   |
| 526509      | <chem>CC1(N=C(N=C(N1OCc2cccc3c2cccc3)N)NC(=O)Nc4ccc(cc4)N(=O)=O)C</chem>    | 7.22528   |
| 525681      | <chem>CCC1(NC(=NC(=N)N1OCc2ccc(c(c2)Cl)Cl)N)CC</chem>                       | 7.23255   |
| 535903      | <chem>Cc1ccc(cc1)N2C(N=C(N=C2N)N)c3cccc3</chem>                             | 7.24711   |

|        |                                                                         |         |
|--------|-------------------------------------------------------------------------|---------|
| 526851 | CC1(N=C(N=C(N1c2ccc3ccccc3c2)N)N)C                                      | 7.26898 |
| 531021 | CC1(NC(=NC(=N)N1OCCSCCON2C(=N)N=C(NC2(C)C)N)N)C                         | 7.29597 |
| 525537 | CC1(N=C(N=C(N1OCCc2cc(c(c2)OC)OC)OC)N)N)C                               | 7.30749 |
| 526153 | CC1(N=C(N=C(N1CCc2ccccc2)N)N)C                                          | 7.32462 |
| 524585 | CCCC1N=C(N=C(N1c2ccc(cc2)Cl)N)N                                         | 7.33093 |
| 542656 | CC1(NC(=NC(=N)N1OCc2c3ccccc3cc(c2OC)OC)N)C                              | 7.33318 |
| 541420 | CC1(N=C(N=C(N1c2ccc(cc2)I)N)N)C                                         | 7.35315 |
| 540626 | CC1(NC(=NC(=N)N1OCCOc2ccc(cc2)C)C3ccccc3)N)C                            | 7.35629 |
| 527643 | c1ccc(cc1)CON2C(N=C(N=C2N)N)c3ccccc3                                    | 7.36532 |
| 531961 | Cc1cc(cc(c1)N2C(=NC(=NC2(C)C)N)N)C                                      | 7.37715 |
| 538080 | CCOC(=O)NC1=NC(=N)N(C(N1)(C)C)OCc2ccc(c(c2)Cl)Cl                        | 7.39077 |
| 539298 | CC1(N=C(N=C(N1OCCCOc2ccccc2)C(=O)O)N)N)C                                | 7.3986  |
| 532043 | CC1(NC(=NC(=N)N1OCCc2cc(c(c2)OC)OC)OC)N)C                               | 7.40746 |
| 524865 | c1ccc(cc1)CCC2N=C(N=C(N2c3ccc(cc3)Cl)N)N                                | 7.42035 |
| 538575 | CC1(N=C(N=C(N1c2ccccc2)Cl)N)N)C                                         | 7.42177 |
| 537162 | CC1(N=C(N=C(N1OCc2cc(c(cc2Cl)CON3C(=NC(=NC3(C)C)N)N)Cl)N)N)C            | 7.42238 |
| 539784 | Cc1ccc(cc1)N2C(=N)N=C(NC2(C)C)N                                         | 7.43668 |
| 529312 | CCCc1cc(ccc1OCCCON2C(=NC(=NC2(C)C)NC(=O)OCC)NC(=O)OCC)C                 | 7.4454  |
| 524688 | CC1(N=C(N=C(N1OCC2COc3ccccc3O2)N)N)C                                    | 7.45613 |
| 542056 | CC(=O)Nc1ccc(cc1)S(=O)(=O)NC2=NC(=N)N(C(N2)(C)C)OCc3ccc(c(c3)Cl)Cl      | 7.46963 |
| 541047 | CCC(c1ccccc1)ON2C(=NC(=NC2(C)C)N)N                                      | 7.47493 |
| 537720 | CC1N=C(N=C(N1OCc2ccccc2)N)N                                             | 7.48312 |
| 541502 | CCOC(=O)NC1=NC(N(C(=N1)NC(=O)OCC)OCCCOc2cc(c(cc2Cl)Cl)Cl)(C)C           | 7.50627 |
| 535368 | CC1(NC(=NC(=N)N1OCc2c3ccccc3ccc2OC)N)C                                  | 7.54037 |
| 530808 | CCCc1ccc(cc1)N2C(=NC(=NC2(C)C)N)N                                       | 7.54748 |
| 529494 | CC=C CON1C(=N)N=C(NC1(C)C)N                                             | 7.55406 |
| 534193 | CC1(N=C(N=C(N1c2ccc(cc2)C(C)(C)C)N)N)C                                  | 7.57352 |
| 527400 | CC(C)C(=O)ONC1=NC(N(C(=N1)NOC(=O)C(C)C)OCCCOc2cc(c(cc2Cl)Cl)Cl)(C)C     | 7.57475 |
| 533818 | CC1(NC(=NC(=N)N1OCCCN(C(=O)c2ccc(cc2)C(=O)NCCCON3C(=N)N=C(NC3(C)C)N)N)C | 7.66548 |
| 537543 | Cc1cc(ccc1Cl)N2C(=NC(=NC2(C)C)N)N                                       | 7.68008 |
| 537173 | CCC(C)c1cccc(c1OCCCON2C(=NC(=NC2(C)C)N)N)C(C)CC                         | 7.6991  |
| 532360 | CC1(NC(=NC(=N)N1OCCN(C)c2ccccc2)N)C                                     | 7.71168 |
| 529801 | c1ccc(cc1)C2N=C(N=C(N2c3ccc(c(c3)Cl)Cl)N)N                              | 7.83565 |
| 541189 | CC1(NC(=NC(=N)N1OCc2cc(c(cc2CON3C(=N)N=C(NC3(C)C)N)Cl)Cl)N)C            | 7.83689 |
| 536378 | CCC(C)(C)c1ccc(cc1)N2C(=NC(=NC2(C)C)N)N                                 | 7.93    |
| 525631 | CC1(N=C(N=C(N1c2cc(c(c2)Cl)Cl)Cl)N)N)C                                  | 7.94413 |
| 539767 | CC(c1ccccc1)ON2C(=NC(=NC2(C)C)N)N                                       | 7.96282 |
| 538164 | Cc1cc2ccccc2c(c1C)CON3C(=N)N=C(NC3(C)C)N                                | 8.02247 |
| 541124 | CC1(N=C(N=C(N1c2ccc(cc2)Br)N)N)C                                        | 8.03639 |
| 543059 | CCc1ccc(cc1)N2C(=NC(=NC2(C)C)N)N                                        | 8.05434 |
| 530518 | CC1(N=C(N=C(N1c2ccccc2)C(F)(F)F)N)N)C                                   | 8.06454 |
| 525486 | CC(=O)NC1=NC(=NC(=O)C)N(C(N1)(C)C)OCCCOc2ccc(c(c2)Cl)Cl                 | 8.07943 |
| 524645 | CC1(N=C(N=C(N1OCc2ccccc2)C#N)N)N)C                                      | 8.1007  |
| 536182 | CC1(N=C(N=C(N1OCc2ccc3ccccc3c2)N)NC(=O)c4ccc(cc4)N(=O)=O)C              | 8.12078 |
| 530224 | CC1(NC(=NC(=N)N1OCCCOc2c(cccc2OC)OC)N)C                                 | 8.13806 |
| 530120 | CC1(NC(=NC(=N)N1OCCCOc2ccc(cc2)N)N)C                                    | 8.15268 |
| 525105 | CC1(N=C(N=C(N1OCc2ccccc3c2ccccc3)N)NC(=O)c4cc(cc(c4)N(=O)=O)N(=O)=O)C   | 8.16513 |
| 539291 | Cc1ccc(cc1Cl)N2C(=NC(=NC2(C)C)N)N                                       | 8.1665  |
| 528184 | CC1(N=C(N=C(N1c2ccc(c(c2)Cl)C(C)(C)C)N)N)C                              | 8.1832  |
| 531569 | CCCC(C)c1ccc(cc1)N2C(=NC(=NC2(C)C)N)N                                   | 8.20304 |
| 524583 | CC1(NC(=NC(=N)N1OCc2ccc(c(c2)OC)OC)N)C                                  | 8.21773 |
| 538230 | CC1(NC(=NC(=N)N1OCCc2ccc(c(c2)OC)OC)N)C                                 | 8.22819 |
| 524837 | CC1(NC(=NC(=N)N1OCOc2ccc(cc2)Cl)N)C                                     | 8.3376  |
| 533539 | CCCc1cc(ccc1OCCCON2C(=N)N=C(NC2(C)C)N)C(=O)C                            | 8.33985 |
| 531304 | CC1(N=C(N=C(N1OCC=Cc2ccccc2)N)N)C                                       | 8.37302 |
| 537904 | CCOc1ccccc1CON2C(=NC(=NC2(C)C)N)N                                       | 8.43014 |
| 530222 | CC1(N=C(N=C(N1OCc2ccc3c(c2)OCO3)N)N)C                                   | 8.43381 |
| 531500 | Cc1cc(c(cc1C)CON2C(=N)N=C(NC2(C)C)N)C                                   | 8.43965 |
| 525815 | CCC1N=C(N=C(N1OCc2ccc(c(c2)Cl)Cl)N)N                                    | 8.47502 |
| 538818 | CC1(NC(=NC(=N)N1OCCCOc2cc(ccc2Cl)Cl)N)C                                 | 8.49485 |
| 538842 | CC1(NC(=NC(=N)N1OCCc2ccc(cc2)N)N)C                                      | 8.49485 |

|        |                                                          |         |
|--------|----------------------------------------------------------|---------|
| 538977 | CC1(NC(=NC(=N)N1OCCOc2cccc(c2)C(F)(F)N)N)C               | 8.49485 |
| 538794 | CC1(NC(=NC(=N)N1OCCc2cccc3c2cccc3)N)C                    | 8.49485 |
| 538720 | CC1(NC(=NC(=N)N1OCCCOc2cc(cc(c2)Cl)Cl)N)C                | 8.49485 |
| 524927 | CC(C)Oc1ccc(cc1)CCCON2C(=N)N=C(NC2(C)C)N                 | 8.49485 |
| 538034 | CCOC(=O)NC1=NC(=N)N(C(N1)(C)C)OCCCOc2cc(c(cc2Cl)Cl)Cl    | 8.49485 |
| 537851 | CCCc1cccc(c1OCCCON2C(=N)N=C(NC2(C)C)N)C                  | 8.49485 |
| 525208 | CC(=O)NCC(=O)NC1=NC(=N)N(C(N1)(C)C)OCc2ccc3ccccc3c2      | 8.49485 |
| 537608 | Cc1ccc(cc1C)OCCCON2C(=N)N=C(NC2(C)C)N                    | 8.49485 |
| 525549 | CC(CON1C(=NC(=NC1(C)C)N)N)c2ccc(cc2Cl)Cl                 | 8.49485 |
| 531829 | CC(CCON1C(=NC(=NC1(C)C)N)N)c2ccc(cc2)Cl                  | 8.49485 |
| 524467 | CC1(NC(=NC(=N)N1OCCCOc2cccc3c2cccc3)N)C                  | 8.49485 |
| 542633 | CCCOC(=O)c1ccc(cc1)OCCCON2C(=N)N=C(NC2(C)C)N             | 8.49485 |
| 542614 | CC1(NC(=NC(=N)N1OCCCCCOc2ccc(c3c2cccc3)Cl)N)C            | 8.49485 |
| 542529 | CC(COc1ccc(cc1)c2cccc2)CON3C(=NC(=NC3(C)C)N)N            | 8.49485 |
| 524695 | CC1(N=C(N=C(N1OCCc2cccc2)N)N)C                           | 8.49485 |
| 542036 | CC1(NC(=NC(=N)N1OCCc2c(cccc2Cl)Cl)N)C                    | 8.49485 |
| 524739 | CC1(NC(=NC(=N)N1OCCc2ccc(cc2Cl)Cl)N)C                    | 8.49485 |
| 541801 | CC1(NC(=NC(=N)N1OCCCOc2ccc(cc2)OC)N)C                    | 8.49485 |
| 541715 | CCSc1cccc1CON2C(=N)N=C(NC2(C)C)N                         | 8.49485 |
| 524772 | CC1(NC(=NC(=N)N1OCCc2ccc(cc2)OC)N)C                      | 8.49485 |
| 524800 | CC1(NC(=NC(=N)N1OCCc2cccc2)N)C                           | 8.49485 |
| 524801 | CC1(NC(=NC(=N)N1OCC2CCCC2)N)C                            | 8.49485 |
| 541413 | CC1(NC(=NC(=N)N1OCCCCCOc2cc(c(c(c2)OC)OC)OC)N)C          | 8.49485 |
| 524822 | CCc1ccc(cc1)OCCCON2C(=N)N=C(NC2(C)C)N                    | 8.49485 |
| 541127 | CC1(NC(=NC(=N)N1OCc2cccs2)N)C                            | 8.49485 |
| 541061 | CC(Cc1ccc(cc1Cl)Cl)CON2C(=NC(=NC2(C)C)N)N                | 8.49485 |
| 540842 | c1c(c(cc(c1Cl)Cl)Cl)OCCCON2C(=N)N=C(NC23CCCC3)N          | 8.49485 |
| 540656 | CC1(NC(=NC(=N)N1OCc2ccc(cc2)c3cccc3)N)C                  | 8.49485 |
| 540612 | CC(Cc1ccc(cc1)OC)CON2C(=NC(=NC2(C)C)N)N                  | 8.49485 |
| 529779 | CCCc1cc(ccc1OCCCON2C(=NC(=NC2(C)C)N)N)C                  | 8.49485 |
| 539353 | CC1(NC(=NC(=N)N1OCCSc2cc(sc2Cl)Cl)N)C                    | 8.49485 |
| 539345 | CC(CCON1C(=NC(=NC1(C)C)N)N)c2ccc(c(c2)Cl)Cl              | 8.49485 |
| 524856 | CC1(NC(=NC(=N)N1OCCCOc2cccc2)N)C                         | 8.49485 |
| 539136 | CC1(NC(=NC(=N)N1OCCCOc2c(cccc2OC)CC=C)N)C                | 8.49485 |
| 539037 | CCC1N=C(N=C(N1OCCCOc2c(cc(cc2Cl)Cl)Cl)N)N                | 8.49485 |
| 539033 | CCOC(=O)c1cc(cc(c1OCCCON2C(=N)N=C(NC2(C)C)N)Cl)Cl        | 8.49485 |
| 539017 | Cc1ccc2cccc2c1CCCON3C(=N)N=C(NC3(C)C)N                   | 8.49485 |
| 532591 | CC(C)c1ccc(cc1)OCCCON2C(=N)N=C(NC2(C)C)N                 | 8.49485 |
| 527478 | CCOc1ccc(cc1)OCCCON2C(=N)N=C(NC2(C)C)N                   | 8.49485 |
| 532397 | Cc1cc(c(c(c1C)OCCCON2C(=N)N=C(NC2(C)C)N)C)C              | 8.49485 |
| 532320 | CCSc1ccc(cc1)CON2C(=NC(=NC2(C)C)N)N)C                    | 8.49485 |
| 527707 | CC1(NC(=NC(=N)N1OCOc2cc(c(cc2Cl)Cl)Cl)N)C                | 8.49485 |
| 527717 | CC1(NC(=NC(=N)N1OCCCOc2cccc(c2)Cl)N)C                    | 8.49485 |
| 527991 | CC1(N=C(N=C(N1OCCCOc2ccc(cc2CC=C)Br)N)N)C                | 8.49485 |
| 528221 | CC1(NC(=NC(=N)N1OCCOc2ccc3ccccc3c2)N)C                   | 8.49485 |
| 531858 | CC1(N=C(N=C(N1OCc2cccc3c2ccc4c3cccc4)N)N)C               | 8.49485 |
| 531837 | CC1(N=C(N=C(N1OCc2ccc3ccccc3c2)N)N)C                     | 8.49485 |
| 531799 | Cc1cccc(c1C)OCCCON2C(=N)N=C(NC2(C)C)N                    | 8.49485 |
| 531467 | CC(C)C(=O)ONC1=NC(=N)N(C(N1)(C)C)OCCCOc2cc(c(cc2Cl)Cl)Cl | 8.49485 |
| 531305 | CCCc1cc(ccc1OCCCON2C(=N)N=C(NC2(C)C)N)OCCCOc3ccccc3      | 8.49485 |
| 531220 | CCCc1cccc(c1OCCCON2C(=NC(=NC2(C)C)N)N)OC                 | 8.49485 |
| 528250 | CC1(N=C(N=C(N1OCCCOc2ccc(cc2)C(C)(C)C)N)N)C              | 8.49485 |
| 528252 | Cc1cccc2c1cccc2CON3C(=NC(=NC3(C)C)N)N                    | 8.49485 |
| 530893 | Cc1ccc(cc1)CON2C(=N)N=C(NC2(C)C)N)C(C)C                  | 8.49485 |
| 530819 | CC1(NC(=NC(=N)N1OCCSc2cccc2)N)C                          | 8.49485 |
| 528415 | CC1(NC(=NC(=N)N1OCCCOc2ccc(cc2C(C)(C)C)C(C)(C)C)N)C      | 8.49485 |
| 528462 | CC1N=C(N=C(N1OCc2cccc3c2cccc3)N)N                        | 8.49485 |
| 530272 | CC(C)Sc1ccc(cc1)CON2C(=N)N=C(NC2(C)C)N)Cl                | 8.49485 |
| 528526 | CCOC(=O)c1cc(ccc1OCCCON2C(=N)N=C(NC2(C)C)N)Cl            | 8.49485 |
| 528590 | CC1(NC(=NC(=N)N1OCc2cccc(c2Cl)Cl)N)C                     | 8.49485 |
| 524852 | Cc1cccc(c1OCCCON2C(=N)N=C(NC2(C)C)N)CC=C                 | 8.49485 |



|        |                                                          |         |
|--------|----------------------------------------------------------|---------|
| 529742 | CCCOc1ccc(cc1)OCCCON2C(=N)N=C(NC2(C)C)N                  | 8.49485 |
| 528783 | CC1(NC(=NC(=N)N1OCCc2cc(c(cc2Cl)Cl)Cl)N)C                | 8.49485 |
| 529477 | CC1(N=C(N=C(N1c2ccc(c(c2)Cl)OCc3cccc(c3)C(=O)N(C)C)N)N)C | 8.49485 |
| 529342 | CC1(NC(=NC(=N)N1OCCCCCOc2ccccc2)N)C                      | 8.49485 |
| 529307 | CC1(NC(=NC(=N)N1OCCc2ccccc2OC)N)C                        | 8.49485 |
| 529158 | CCc1cccc1OCCCON2C(=N)N=C(NC2(C)C)N                       | 8.49485 |
| 537294 | CC1(N=C(N=C(N1OCCCOc2cc(c(cc2Cl)Cl)N)N)C                 | 8.49485 |
| 537164 | c1ccc2c(c1)cccc2OCCCON3C(=N)N=C(NC34CCCC4)N              | 8.49485 |
| 537085 | CC1(NC(=NC(=N)N1OCCCOc2ccc(cc2)N(=O)=O)N)C               | 8.49485 |
| 537078 | CC1(NC(=NC(=N)N1OCc2cc(cc3c2OCOC3)Cl)N)C                 | 8.49485 |
| 525601 | Cc1ccc(cc1C)CON2C(=N)N=C(NC2(C)C)N                       | 8.49485 |
| 536896 | CCC1N=C(N=C(N1OCc2cccc3c2cccc3)N)N                       | 8.49485 |
| 525634 | CC1(NC(=NC(=N)N1OCCSc2ccccc2)N)C                         | 8.49485 |
| 536381 | Cc1ccc(c(c1)CC=C)OCCCON2C(=NC(=NC2(C)C)N)N               | 8.49485 |
| 525772 | CC(=O)NC1=NC(N(C(=N1)NC(=O)C)OCc2ccc(c(c2)Cl)Cl)(C)C     | 8.49485 |
| 535970 | CCC(c1ccc(cc1)Cl)ON2C(=NC(=NC2(C)C)N)N                   | 8.49485 |
| 526115 | CC1(NC(=NC(=N)N1OCCCCOc2ccccc2)N)C                       | 8.49485 |
| 535647 | CCC(CCON1C(=NC(=NC1(C)C)N)N)c2ccc(c(c2)Cl)Cl             | 8.49485 |
| 535464 | CC1(NC(=NC(=N)N1OCCCOc2ccccc2Cl)N)C                      | 8.49485 |
| 526119 | CC1(NC(=NC(=N)N1OCCCCOc2ccc(cc2)OC)N)C                   | 8.49485 |
| 535191 | Cc1ccc(cc1C)OCCCON2C(=N)N=C(NC2(C)C)N                    | 8.49485 |
| 526563 | CC1(NC(=NC(=N)N1OCCCN(C(=O)c2ccc(cc2)N(=O)=O)N)C         | 8.49485 |
| 534978 | CC1(N=C(N=C(N1c2ccc(c(c2)Cl)Cl)N)N)C                     | 8.49485 |
| 526736 | CC1(NC(=NC(=N)N1OCCCOc2ccccc2C(C)(C)C)N)C                | 8.49485 |
| 534838 | Cc1cccc1OCCCON2C(=N)N=C(NC2(C)C)N                        | 8.49485 |
| 534669 | CCC(C)Oc1ccc(cc1)CCCON2C(=NC(=NC2(C)C)N)N                | 8.49485 |
| 526941 | CC1(N=C(N=C(N1OCCc2ccc3ccccc3c2)N)N)C                    | 8.49485 |
| 534569 | CCC(CCON1C(=NC(=NC1(C)C)N)N)c2ccc(cc2)Cl                 | 8.49485 |
| 534373 | CC1(NC(=NC(=N)N1OCCCCOc2ccc(cc2C3CCCC3)Cl)N)C            | 8.49485 |
| 534022 | CC1(NC(=NC(=N)N1OCCc2ccccc2)C(F)(F)F)N)C                 | 8.49485 |
| 533641 | CCCOc1ccc(cc1)CCCON2C(=NC(=NC2(C)C)N)N                   | 8.49485 |
| 533500 | CCc1cccc(c1)OCCCON2C(=N)N=C(NC2(C)C)N                    | 8.49485 |
| 533210 | CCOc1ccc(cc1)CCCON2C(=N)N=C(NC2(C)C)N                    | 8.49485 |
| 533001 | CC1(NC(=NC(=N)N1OCCSc2ccc(c(c2)Cl)Cl)N)C                 | 8.49485 |
| 527100 | Cc1cc(c(c(c1)Br)OCCCON2C(=N)N=C(NC2(C)C)N)Br             | 8.49485 |
| 526948 | Cc1ccc(c(c1)Cl)CON2C(=NC(=NC2(C)C)N)N                    | 8.49485 |
| 533127 | CC1(NC(=NC(=N)N1OCCCOc2c(cc(cc2Cl)Cl)Cl)N)C              | 8.53116 |

(c)

| COMPOUND_ID | CANONICAL_SMILES                                                                         | pXC50_3D7 |
|-------------|------------------------------------------------------------------------------------------|-----------|
| 533731      | CCC1(CC1)NCC(C(Cc2ccccc2)NC(=O)c3cc(cc(c3)N4CCCCS4(=O)=O)NCC)O                           | 5.79437   |
| 524959      | CCNc1cc(cc(c1)N2CCCCS2(=O)=O)C(=O)NC(Cc3ccccc3)C(CNCc4ccc5c(c4)OCCO5)O                   | 5.86815   |
| 542708      | CS(=O)(=O)N(c1ccc(cc1)F)c2cc(cc(c2)N3CCCC3=O)C(=O)NC(Cc4ccccc4)C(CNCc5cccc(c5)C(F)(F)F)O | 5.87076   |
| 527834      | COc1cc(cc(c1)OC)CNCC(C(Cc2ccccc2)NC(=O)c3cc(cc(c3)N4CCCCS4(=O)=O)C5CCCC5)O               | 5.90494   |
| 527856      | CCNc1cc(cc(c1)N2CCCC2=O)C(=O)NC(Cc3ccccc3)C(CNCc4cc(ccc4OC)C#N)O                         | 5.91162   |
| 529378      | CCNc1cc(cc(c1)N2CCCCS2(=O)=O)C(=O)NC(Cc3ccccc3)C(CNC4(CCC4)Cc5cccc(c5)Cl)O               | 5.92907   |
| 535228      | CCNc1cc(cc(c1)N2CCCCS2(=O)=O)C(=O)NC(Cc3ccccc3)C(CNCCc4cc(cc(c4)OC)OC)O                  | 5.94299   |
| 541547      | CCNc1cc(c(c(c1)N2CCCCS2(=O)=O)F)C(=O)NC(Cc3ccccc3)C(CNC(C)CC(C)C)O                       | 5.95261   |
| 530426      | CCCC1(CC1)NCC(C(Cc2ccccc2)NC(=O)c3cc(cc(c3)N4CCCCS4(=O)=O)NCC)O                          | 5.96587   |
| 535238      | CCNc1cc(cc(c1)N2CCCCS2(=O)=O)C(=O)NC(Cc3ccccc3)C(CNC4(CC4)CCC(C)C)O                      | 5.96796   |
| 542640      | CN(C)c1cc(cc2c1cc[nH]2)C(=O)NC(Cc3ccccc3)C(CNC4CCCC4)O                                   | 5.96927   |
| 422028      | CCNc1cc(cc(c1)N2CCCC2=O)C(=O)NC(Cc3ccccc3)C(CNC4CCc5c4cccc5)O                            | 5.98985   |
| 543109      | c1ccc(cc1)CC(C(CNCCC(F)(F)F)O)NC(=O)c2ccccc2)CCC3CC3                                     | 5.98999   |
| 541528      | CCNc1cc(cc(c1)N2CCCCS2(=O)=O)C(=O)NC(Cc3ccccc3)C(CNC4(CC4)CC(C)C)O                       | 5.99234   |
| 541358      | CCNc1cc(cc(c1)N2CCCCS2(=O)=O)C(=O)NC(Cc3ccccc3)C(CNC4CCCC4)O                             | 5.9957    |
| 542559      | CCNc1cc(c(c(c1)N2CCCCS2(=O)=O)F)C(=O)NC(Cc3ccccc3)C(CNC(C)(C)CC(C)(C)C)O                 | 5.99647   |
| 534441      | CCc1c[nH]c2c1cc(cc2N(c3ccccc3)S(=O)(=O)C)C(=O)NC(Cc4ccccc4)C(CNCc5cccc(c5)C(F)(F)F)O     | 6.00133   |
| 533669      | CCCCCNCC(C(Cc1ccccc1)NC(=O)c2cc(cc(c2)N3CCCCS3(=O)=O)NCC)O                               | 6.00218   |
| 528671      | CCNc1cc(cc(c1)N2CCCC2=O)C(=O)NC(Cc3ccccc3)C(CNCCc4cccc5c4cccc5)O                         | 6.00805   |
| 526318      | CCc1cn2c3c1cc(cc3N(S(=O)(=O)CC2)C)C(=O)NC(Cc4ccccc4)C(CNCCOC)O                           | 6.02039   |
| 535050      | CC(C)c1cc(cc(c1)N2CCCC2=O)C(=O)NC(Cc3ccccc3)C(CNCc4cccc(c4)OC)O                          | 6.02111   |
| 526187      | CCCc1cc(c(c(c1)N2CCCC2=O)F)C(=O)NC(Cc3ccccc3)C(CNC(C)C)O                                 | 6.02566   |
| 529743      | CCNc1cc(cc(c1)N2CCCCS2(=O)=O)C(=O)NC(Cc3ccccc3)C(CNCCc4cccc4)O                           | 6.0285    |
| 534738      | CCNc1cc(cc(c1)N2CCCCS2(=O)=O)C(=O)NC(Cc3ccccc3Cl)C(CNC(C)CCCC(C)C)O                      | 6.03229   |
| 533461      | CS(=O)(=O)N(c1cccc(c1)F)c2cc(cc(c2)N3CCCC3=O)C(=O)NC(Cc4ccccc4)C(CNCc5cccc(c5)C(F)(F)F)O | 6.04096   |
| 527715      | CCc1c[nH]c2c1cc(cc2N3CCCCS3(=O)=O)C(=O)NC(Cc4ccccc4)C(CNCc5cccc(c5)OC)O                  | 6.04122   |
| 527505      | CCNc1cc(cc(c1)N2CCCCS2(=O)=O)C(=O)NC(Cc3ccccc3)C(CNC(C)(C)Cc4cccc(c4)Cl)O                | 6.0523    |
| 542491      | CCOCc1cccc(c1)C(=O)NC(Cc2ccccc2)C(CNCc3ccccc3OC)O                                        | 6.054     |
| 527135      | CCNc1cc(cc(c1)N2CCCC2=O)C(=O)NC(Cc3ccccc3)C(CNCCc4cccc(c4)C(F)(F)F)O                     | 6.05606   |
| 542314      | CCc1cn(c2c1cc(cc2)C(=O)NC(Cc3ccccc3)C(CNC(C)(C)CCCC(C)C)O)CCS(=O)(=O)C                   | 6.05709   |
| 530061      | CCCN(CCC)C(=O)c1cc(cc(c1)N2CCCCS2(=O)=O)C(=O)NC(Cc3ccccc3)C(CNCc4cccc(c4)C(F)(F)F)O      | 6.05769   |
| 539500      | COc1cc(cc(c1)N2CCCC2=O)C(=O)NC(Cc3ccccc3)C(CNCc4cc(cc(c4)OC)OC)O                         | 6.06933   |
| 539931      | CCNc1cc(cc(c1)N2CCCC2=O)C(=O)NC(Cc3ccccc3)C(CNCCc4cccc4)O                                | 6.07384   |
| 539002      | CC(C)CCCC(C)(C)NCC(C(Cc1ccccc1)NC(=O)c2ccccc2)OCC3CC3)O                                  | 6.07394   |
| 532608      | CCNc1cc(cc(c1)N2CCCC2=O)C(=O)NC(Cc3ccccc3)C(CNC(C)(C)CCCC(C)C)O                          | 6.08275   |
| 536602      | CCc1c[nH]c2c1cc(cc2N(c3ccccc3)S(=O)(=O)C)C(=O)NC(Cc4ccccc4)C(CNC(C)(C)CCCC(C)C)O         | 6.08464   |
| 537682      | CCNc1cc(cc(c1)N2CCCCS2(=O)=O)C(=O)NC(Cc3ccccc3)C(CNC(C)(C)(C)C)O                         | 6.08612   |
| 542988      | CCc1cn2c3c1cc(cc3N(S(=O)(=O)CC2)C)C(=O)NC(Cc4ccccc4)C(CNCC)O                             | 6.09152   |
| 528485      | c1cc(cc(c1)C(F)(F)F)CNCC(C(Cc2cc(cc(c2)F)F)NC(=O)c3cc(cc(c3)N4CCCC4=O)C5CCCC5)O          | 6.09535   |
| 539161      | CCNc1cc(cc(c1)N2CCCCS2(=O)=O)C(=O)NC(Cc3ccccc3Cl)C(CNC4CCCC4)O                           | 6.09553   |
| 534376      | CC(C)Oc1cc(cc(c1)N2CCCCS2(=O)=O)C(=O)NC(Cc3ccccc3)C(CNCc4cc(cc(c4)OC)OC)O                | 6.09807   |
| 533866      | CCNc1cc(c(c(c1)N2CCCCS2(=O)=O)F)C(=O)NC(Cc3ccccc3)C(CNCCC(C)(C)C)O                       | 6.09833   |
| 532175      | CC(C)CCCC(C)(C)NCC(C(Cc1ccccc1)NC(=O)c2ccccc2)CCC3CC3)O                                  | 6.09888   |
| 532537      | CC(C)Nc1cc(cc(c1)N2CCCCS2(=O)=O)F)C(=O)NC(Cc3ccccc3)C(CNCc4cccc(c4)C(F)(F)F)O            | 6.09999   |
| 540719      | CC(C)Nc1cc(cc(c1)N2CCCCS2(=O)=O)C(=O)NC(Cc3ccccc3)C(CNCc4cccc(c4)OC)O                    | 6.10572   |
| 541569      | CCc1cn(c2c1cc(cc2N3CCCC3=O)C(=O)NC(Cc4ccccc4)C(CNCc5cccc(c5)OC)O)C                       | 6.10587   |
| 537200      | CCc1c[nH]c2c1cc(cc2N3CCCCS3(=O)=O)C(=O)NC(Cc4ccccc4)C(CNC5CCCCC5)O                       | 6.11138   |
| 535448      | CCNc1cc(cc(c1)N2CCCC2=O)C(=O)NC(Cc3ccccc3)C(CNC(C)c4cccc(c4)OC)O                         | 6.11385   |
| 536796      | CCCNCC(C(Cc1ccccc1)NC(=O)c2cc(cc(c2)N3CCCC3=O)NCC)O                                      | 6.11931   |
| 534557      | CCNc1cc(cc(c1)N2CCCCS2(=O)=O)C(=O)NC(Cc3ccc(c(c3)F)F)C(CNCc4cccc(c4)OC)O                 | 6.12559   |
| 528254      | COc1cc(cc(c1)N2CCCCS2(=O)=O)C(=O)NC(Cc3ccccc3)C(CNCc4cc(cc(c4)OC)OC)O                    | 6.12611   |
| 529692      | CCOCc1cccc(c1)C(=O)NC(Cc2ccccc2)C(CNCc3cccc(c3)OC)O                                      | 6.13039   |
| 532671      | CCNc1cc(cc(c1)N2CCCC2=O)C(=O)NC(Cc3ccccc3)C(CNCc4cc(cc(c4)OC)OC)O                        | 6.13341   |
| 531691      | CC(C)Oc1cc(cc(c1)N2CCCCS2(=O)=O)C(=O)NC(Cc3ccccc3)C(CNCc4cccc(c4)OC)O                    | 6.13657   |
| 538957      | COc1cccc(c1)C2(CCCCC2)NCC(C(Cc3ccccc3)NC(=O)c4cccc4)O                                    | 6.137     |
| 531121      | COc1cc(cc(c1)N2CCCCS2(=O)=O)C(=O)NC(Cc3ccccc3)C(CNCc4cccc(c4)OC)O                        | 6.14188   |
| 532093      | CCCC1(CCC1)NCC(C(Cc2ccccc2)NC(=O)c3cc(cc(c3)N4CCCCS4(=O)=O)NCC)O                         | 6.14256   |
| 527301      | CCn1cnc2c1cc(cc2N3CCCCS3(=O)=O)C(=O)NC(Cc4ccccc4)C(CNC5COCOC5)O                          | 6.14764   |

|        |                                                                                    |         |
|--------|------------------------------------------------------------------------------------|---------|
| 538294 | CCNc1cc(cc(c1)N2CCCC2=O)C(=O)NC(Cc3cccc3)C(CNC(C)(C)Cc4cccc(c4)OC)O                | 6.15064 |
| 537723 | COc1cc(cc(c1)OC)CNCC(C(Cc2cccc2)NC(=O)c3cc(cc(c3)N4CCCCS4(=O)=O)C5CCCC5)O          | 6.15242 |
| 527096 | CCNc1cc(c(c1)N2CCCCS2(=O)=O)OC)C(=O)NC(Cc3cccc3)C(CNCc4cccc(c4)OC)O                | 6.16157 |
| 533574 | CCNc1cc(cc(c1)N2CCCCS2(=O)=O)C(=O)NC(Cc3cccc3)C(CNC4(CCC4)C(C)C)O                  | 6.16447 |
| 532322 | CCCCC(C)(C)NCC(C(Cc1cccc1)NC(=O)c2cc(cc(c2)N3CCCC3=O)NCC)O                         | 6.17118 |
| 530511 | CCc1c[nH]c2c1cc(cc2N3CCCS3(=O)=O)C(=O)NC(Cc4cccc4)C(CNC(C)(C)CCCC(C)C)O            | 6.17259 |
| 530137 | CCNc1cc(cc(c1)N2CCCCS2(=O)=O)C(=O)NC(Cc3cccc3)C(CNC4C5CC6CC(C5)CC4C6)O             | 6.17497 |
| 527873 | CCNc1cc(cc(c1)N2CCCC2=O)C(=O)NC(Cc4cccc4)C(CNCc5cccc(c5)OC)O                       | 6.17572 |
| 527239 | CCNc1cc(cc(c1)N2CCCC2=O)C(=O)NC(Cc3cccc3)C(CNC(C)c4cccc4)O                         | 6.17621 |
| 486417 | CCc1cn2c3c1cc(cc3N(S(=O)(=O)CC2)C)C(=O)NC(Cc4cccc4)C(CNCc5cccc5)O                  | 6.17772 |
| 531048 | CCNc1cc(cc(c1)N2CCCC2=O)C(=O)NC(Cc3cccc3)C(CNCc4cccc(c4)c5cnnc5)O                  | 6.17872 |
| 528703 | CCNc1cc(cc(c1)N2CCCCS2(=O)=O)C(=O)NC(Cc3cccc3)C(CNC4CCC(CC4)(C)C)O                 | 6.18935 |
| 530056 | CCNc1cc(cc(c1)N2CCCC2=O)C(=O)NC(Cc3cccc3)C(CNCc4cccc(c4)n5cnc5)O                   | 6.19733 |
| 533790 | CCNc1cc(cc(c1)N2CCCCS2(=O)=O)C(=O)NC(Cc3ccc3)C(CNC(C)CCCC(C)C)O                    | 6.20834 |
| 528853 | c1ccc(cc1)CC(C(CNCC(F)(F)F)O)NC(=O)c2cccc(c2)OCC3CC3                               | 6.21041 |
| 531377 | CCNc1cc(cc(c1)N2CCCCS2(=O)=O)C(=O)NC(Cc3cc(cc(c3)F)F)C(CNCc4cccc(c4)C(F)(F)F)O     | 6.2127  |
| 530807 | COc1cccc(c1)CNCC(C(Cc2cccc2)NC(=O)c3cc(cc(c3)N4CCCCS4(=O)=O)C5CCCC5)O              | 6.2225  |
| 526830 | CCNc1cc(cc(c1)N2CCCCS2(=O)=O)C(=O)NC(Cc3cccc(c3)F)C(CNC(C)CCCC(C)C)O               | 6.22478 |
| 531871 | CC(C)Oc1cc(cc(c1)N2CCCCS2(=O)=O)C(=O)NC(Cc3cccc3)C(CNCc4cc(cc(c4)OC)OC)O           | 6.22896 |
| 524925 | CCn1ccc2c1cc(cc2N3CCCC3=O)C(=O)NC(Cc4cccc4)C(CNCc5cccc(c5)OC)O                     | 6.23069 |
| 535485 | CCn1cnc2c1cc(cc2N3CCCC3=O)C(=O)NC(Cc4cccc4)C(CNC5CCCC5)O                           | 6.24138 |
| 539777 | CCc1cn(c2c1cc(cc2)C(=O)NC(Cc3cccc3)C(CNC(C)(C)CCCC(C)C)O)CCOC                      | 6.24469 |
| 530017 | CCNc1cc(cc(c1)N2CCCC2=O)C(=O)NC(Cc3cccc3)C(CNCCCc4ccc(cc4)OC)O                     | 6.25501 |
| 534259 | CCNc1cc(cc(c1)N2CCCCS2(=O)=O)C(=O)NC(Cc3cccc3)C(CNC4CC5c4cccc5)O                   | 6.25582 |
| 532724 | CCCN(CCC)C(=O)c1cc(cc(c1)N2CCCCS2(=O)=O)C(=O)NC(Cc3cccc3)C(CNCc4cccc(c4)OC)O       | 6.26026 |
| 528731 | CCc1cn2c3c1cc(cc3N(S(=O)(=O)CC2)C)C(=O)NC(Cc4cccc4)C(CNCc5ccc(cc5)C)O              | 6.26179 |
| 535339 | CC(C)c1c[nH]c2c1cc(cc2N3CCCC3=O)C(=O)NC(Cc4cccc4)C(CNCc5cccc(c5)OC)O               | 6.27667 |
| 542062 | COc1cc(cc(c1)N2CCCCS2(=O)=O)C(=O)NC(Cc3cccc3)C(CNCc4cc(cc(c4)OC)OC)O               | 6.28443 |
| 534800 | CCNc1cc(cc(c1)N2CCCCS2(=O)=O)C(=O)NC(Cc3cccc3)C(CNCc4cccc(c4)OC)O                  | 6.28578 |
| 526116 | CCNc1cc(cc(c1)N2CCCC2=O)C(=O)NC(Cc3cccc3)C(CNCCC(C)c4cccc4)O                       | 6.29132 |
| 535811 | CCc1c[nH]c2c1cc(cc2N3CCCC3=O)C(=O)NC(Cc4cccc4)C(CNC(C)(C)CCCC(C)C)O                | 6.29138 |
| 526345 | CCCC1(CCCC1)NCC(C(Cc2cccc2)NC(=O)c3cc(cc(c3)N4CCCCS4(=O)=O)NCC)O                   | 6.29696 |
| 536299 | CCNc1cc(cc(c1)N2CCCCS2(=O)=O)C(=O)NC(Cc3cccc3)C(CNC(C)Cc4cccc(c4)Cl)O              | 6.30451 |
| 539930 | CCn1ccc2c1cc(cc2N3CCCC3(=O)=O)C(=O)NC(Cc4cccc4)C(CNC(C)(C)CCCC(C)C)O               | 6.30879 |
| 536197 | CCc1cn(c2c1cc(cc2N3CCCC3=O)C(=O)NC(Cc4cccc4)C(CNC(C)(C)CCCC(C)C)O)C                | 6.31256 |
| 539142 | CCNc1cc(cc(c1)N2CCCC2=O)C(=O)NC(Cc3cccc3)C(CNCC(C)C)O                              | 6.31407 |
| 532531 | CCNc1cc(cc(c1)N2CCCCS2(=O)=O)C(=O)NC(Cc3cccc3)C(CNC(C)(C)CCCC(C)C)O                | 6.35062 |
| 537511 | CCNc1cc(cc(c1)N2CCCC2=O)C(=O)NC(Cc3cccc3)C(CNC4CCC(CC4)C(C)(C)C)O                  | 6.35307 |
| 542597 | CCn1ccc2c1cc(cc2N3CCCCS3(=O)=O)C(=O)NC(Cc4cccc4)C(CNC(C)(C)CCCC(C)C)O              | 6.37868 |
| 530975 | CCNc1cc(cc(c1)N2CC(CCS2(=O)=O)c3cccc3)C(=O)NC(Cc4cccc4)C(CNC(C)C)O                 | 6.38505 |
| 536751 | CCCCC(C)NCC(C(Cc1cccc1)NC(=O)c2cc(cc(c2)N3CCCCS3(=O)=O)NCC)O                       | 6.39968 |
| 536703 | CCCCNCC(C(Cc1cccc1)NC(=O)c2cc(cc(c2)N3CCCCS3(=O)=O)NCC)O                           | 6.4002  |
| 540704 | CCn1ccc2c1cc(cc2N3CCCC3=O)C(=O)NC(Cc4cccc4)C(CNC(C)(C)CCCC(C)C)O                   | 6.45997 |
| 531124 | CCc1cn2c3c1cc(cc3N(S(=O)(=O)C2)C)C(=O)NC(Cc4cccc4)C(CNC(C)C)O                      | 6.49827 |
| 542158 | CS(=O)(=O)N(c1cccc1)c2cc(cc(c2)N3CCCC3=O)C(=O)NC(Cc4cccc4)C(CNC5CC5)O              | 6.51605 |
| 422026 | CCNc1cc(cc(c1)N2CCCC2=O)C(=O)NC(Cc3cccc3)C(CNC4CCc5c4cccc5)O                       | 6.53054 |
| 538376 | CCNc1cc(cc(c1)N2CCCCS2(=O)=O)C(=O)NC(Cc3cccc(c3)Cl)C(CNC(C)CCCC(C)C)O              | 6.54514 |
| 533789 | CCc1cn2c3c1cc(cc3N(S(=O)(=O)CC2)C)C(=O)NC(Cc4cccc4)C(CNCc5cccc5C)O                 | 6.56749 |
| 528471 | CCC1(CCCC1)NCC(C(Cc2cccc2)NC(=O)c3cc(cc(c3)N4CCCCS4(=O)=O)NCC)O                    | 6.57607 |
| 536143 | CCNc1cc(cc(c1)N2CCCC2=O)C(=O)NC(Cc3cccc3)C(CNC(C)(C)C4cccc4)O                      | 6.58173 |
| 531861 | CCNc1cc(cc(c1)N2CCCC2=O)C(=O)NC(Cc3cccc3)C(CNC(C)(C)CSCC(C)C)O                     | 6.58527 |
| 537964 | CCCC1(CCCC1)NCC(C(Cc2cccc2)NC(=O)c3cc(cc(c3)N4CCCCS4(=O)=O)NCC)O                   | 6.60745 |
| 543035 | CCc1cn2c3c1cc(cc3N(S(=O)(=O)CC2)C)C(=O)NC(Cc4cccc4)C(CNCc5cccc(c5)C)O              | 6.60923 |
| 537709 | CCc1cn2c3c1cc(cc3N(S(=O)(=O)C2)C)C(=O)NC(Cc4cccc4)C(CNC(C)(C)CCCC(C)C)O            | 6.61979 |
| 529198 | CCNc1cc(cc(c1)N2CCCCS2(=O)=O)C(=O)NC(Cc3cccc3)C(CNC4CC5CCC4C5)O                    | 6.62577 |
| 542041 | CCc1c[nH]c2c1cc(cc2N3CCCCS3(=O)=O)C(=O)NC(Cc4cccc4)C(CNC(C)(C)c5cccc(c5)C(F)(F)F)O | 6.64181 |
| 531004 | CCn1cnc2c1cc(cc2N3CCCCS3(=O)=O)C(=O)NC(Cc4cccc4)C(CNC(C)(C)c5cccc(c5)C(F)(F)F)O    | 6.64374 |
| 535460 | COc1cc(cc(c1)OC)CNCC(C(Cc2cccc2)NC(=O)c3cc(cc(c3)N4CCCC4=O)C5CCCC5)O               | 6.64975 |
| 531366 | COc1cc(cc(c1)N2CCCCS2(=O)=O)C(=O)NC(Cc3cccc3)C(CNC(C)(C)c4cccc(c4)OC)O             | 6.65049 |
| 538916 | CCCNCC(C(Cc1cccc1)NC(=O)c2cc(cc(c2)N3CCCCS3(=O)=O)NCC)O                            | 6.6507  |
| 541833 | CC(C)CCCC(C)(C)NCC(C(Cc1cccc1)NC(=O)c2cc(cc(c2F)N3CCCCS3(=O)=O)NC(C)C)O            | 6.65862 |

|        |                                                                                  |         |
|--------|----------------------------------------------------------------------------------|---------|
| 538657 | CCNc1cc(cc(c1)N2CCCCS2(=O)=O)C(=O)NC(Cc3cccc3)C(CNC45CC6CC(C4)CC(C6)C5)O         | 6.65963 |
| 529935 | CCNc1cc(cc(c1)N2CCCCS2(=O)=O)C(=O)NC(Cc3cccc3)C(CNC(C)CCCC(C)C)O                 | 6.65965 |
| 530895 | CCc1cn(c2c1cc(cc2)C(=O)NC(Cc3cccc3)C(CNC(C)(C)CCCC(C)C)O)CCc4cccc4               | 6.6601  |
| 533149 | CCNc1cc(c(c(c1)N2CCCCS2(=O)=O)F)C(=O)NC(Cc3cccc3)C(CNC4CCC(CC4)(F)F)O            | 6.67376 |
| 534206 | CCn1cc2c3c1cc(cc3N(S(=O)(=O)CC2)C)C(=O)NC(Cc4cccc4)C(CNC5CCOCC5)O                | 6.68183 |
| 540034 | CC(C)CCCC(C)(C)NCC(C(Cc1cccc1)NC(=O)c2cc(cc(c2)N3CCCCS3(=O)=O)NC(C)C)O           | 6.68704 |
| 536573 | CCNc1cc(c(c(c1)N2CCCCS2(=O)=O)F)C(=O)NC(Cc3cccc3)C(CNC(C)(C)CCCC(C)C)O           | 6.69494 |
| 525339 | CCCCNCC(C(Cc1cccc1)NC(=O)c2cc3c(cn4c3c(c2)N(S(=O)(=O)CC4)C)CC)O                  | 6.70445 |
| 527009 | CCCC(C)NCC(C(Cc1cccc1)NC(=O)c2cc(cc(c2)N3CCCCS3(=O)=O)NCC)O                      | 6.70709 |
| 533757 | CCc1c[nH]c2c1cc(cc2N3CCCC3=O)C(=O)NC(Cc4cccc4)C(CNC(C)(C)c5cccc(c5)OC)O          | 6.71597 |
| 539174 | CCc1cn(c2c1cc(cc2)C(=O)NC(Cc3cccc3)C(CNCc4cccc(c4)C(F)(F)F)O)CCCO                | 6.73073 |
| 533531 | CC(C)Nc1cc(c(c(c1)N2CCCCS2(=O)=O)F)C(=O)NC(Cc3cccc3)C(CNC4CCOCC4)O               | 6.73727 |
| 527994 | CC(C)c1cn2c3c1cc(cc3N(S(=O)(=O)CC2)C)C(=O)NC(Cc4cccc4)C(CNC(C)C)O                | 6.74832 |
| 533586 | CCNc1cc(cc(c1)N2CCCCS2(=O)=O)C(=O)NC(Cc3cccc3)C(CNC4CCCC4)O                      | 6.77031 |
| 541114 | c1ccc(cc1)CC(C(CNC2CCCC2)O)NC(=O)c3cc(cc(c3)N4CCCC4=O)C5CCCC5                    | 6.77161 |
| 540071 | CCc1c[nH]c2c1cc(cc2N3CCCC3=O)C(=O)NC(Cc4cccc4)C(CNCc5cccc(c5)OC)O                | 6.77255 |
| 536023 | CCc1cc(c(c(c1)N2CCCCS2(=O)=O)F)C(=O)NC(Cc3cccc3)C(CNC4CCOCC4)O                   | 6.77893 |
| 541636 | CCCC(C)NCC(C(Cc1cccc1)NC(=O)c2cc(cc(c2)N3CCCCS3(=O)=O)NCC)O                      | 6.78887 |
| 528026 | c1ccc(cc1)CC(C(CNC2CCc3c2cccc3)O)NC(=O)c4cc(cc(c4)N5CCCC5=O)C6CCCC6              | 6.78927 |
| 527447 | c1ccc(cc1)CC(C(CNC2CCc3cccc3C2)O)NC(=O)c4cc(cc(c4)N5CCCC5=O)C6CCCC6              | 6.79267 |
| 538326 | CCCN(CCC)C(=O)c1cc(cc(c1)N2CCCCS2(=O)=O)C(=O)NC(Cc3cccc3)C(CNC4CC4)O             | 6.80553 |
| 528855 | CCNc1cc(cc(c1)N2CCCCS2(=O)=O)C(=O)NC(Cc3cccc3)C(CNC4(CCCCC4)C)O                  | 6.80687 |
| 538100 | CC(C)c1cn2c3c1cc(cc3N(S(=O)(=O)CC2)C)C(=O)NC(Cc4cccc4)C(CNCc5cccc(c5)OC)O        | 6.81125 |
| 534308 | CC(C)(C)Nc1cc(cc(c1)N2CCCCS2(=O)=O)C(=O)NC(Cc3cccc3)C(CNC4CCOCC4)O               | 6.82257 |
| 531412 | CCNc1cc(cc(c1)N2CCCCS2(=O)=O)C(=O)NC(Cc3ccc(cc3)Cl)C(CNC4CCCC4)O                 | 6.82297 |
| 538000 | CCn1c2cc(cc(c2n1)N3CCCC3=O)C(=O)NC(Cc4cccc4)C(CNC(C)(C)c5cccc(c5)C(F)(F)F)O      | 6.82698 |
| 542835 | CCCC(C)NCC(C(Cc1cccc1)NC(=O)c2cc(cc(c2)N3CCCCS3(=O)=O)C4CCCC4)O                  | 6.83252 |
| 538502 | CCc1cn2c3c1cc(cc3N(S(=O)(=O)CC2)C)C(=O)NC(Cc4cccc(c4)Cl)C(CNC5CC5)O              | 6.83773 |
| 526920 | CCc1cn2c3c1cc(cc3N(S(=O)(=O)CC2)C)C(=O)NC(Cc4cccc(c4)F)C(CNC5CC5)O               | 6.84595 |
| 537334 | CCNc1cc(cc(c1)N2CCCC2=O)C(=O)NC(Cc3cccc3)C(CNC(C)(C)c4cccc(c4)OC)O               | 6.84603 |
| 531966 | CCNc1cc(cc(c1)N2CCCCS2(=O)=O)C(=O)NC(Cc3cccc3)C(CNC4CCC(C4)(C)C)O                | 6.85918 |
| 534231 | CCn1ccc2c1cc(cc2N3CCCCS3(=O)=O)C(=O)NC(Cc4cccc4)C(CNC5CCCC5)O                    | 6.86176 |
| 530733 | CCNc1cc(cc(c1)N2CCCC2=O)C(=O)NC(Cc3cccc3)C(CNC4CCSCC4)O                          | 6.87505 |
| 537989 | CCn1ccc2c1cc(cc2N3CCCCS3(=O)=O)C(=O)NC(Cc4cccc4)C(CNC(C)(C)c5cccc(c5)C(F)(F)F)O  | 6.8775  |
| 531686 | CCn1ccc2c1cc(cc2N3CCCCS3(=O)=O)C(=O)NC(Cc4cccc4)C(CNC5CCCC5)O                    | 6.91234 |
| 541375 | CC(C)c1cc(cc(c1)N2CCCC2=O)C(=O)NC(Cc3cccc3)C(CNC4CCCC4)O                         | 6.91863 |
| 533327 | CCn1ccc2c1cc(cc2N3CCCC3=O)C(=O)NC(Cc4cccc4)C(CNC5CCCC5)O                         | 6.92322 |
| 525517 | CCc1cn2c3c1cc(cc3N(S(=O)(=O)CC2)C)C(=O)NC(Cc4cc(cc(c4)F)F)C(CNC5CC5)O            | 6.92327 |
| 527407 | CCc1cn(c2c1cc(cc2N3CCCC3=O)C(=O)NC(Cc4cccc4)C(CNC5CCCC5)O)C                      | 6.92723 |
| 531482 | CCNc1cc(cc(c1)N2CCCCS2(=O)=O)C(=O)NC(Cc3ccc(cc3)F)F)C(CNC4CCCC4)O                | 6.93143 |
| 532534 | CCc1c[nH]c2c1cc(cc2N3CCCC3=O)C(=O)NC(Cc4cccc4)C(CNC(C)(C)c5cccc(c5)C(F)(F)F)O    | 6.93919 |
| 530456 | CCc1cn2c3c1cc(cc3N(S(=O)(=O)CC2)C)C(=O)NC(Cc4cccc4)C(CNC5CC5)O                   | 6.95001 |
| 532693 | CCN1CCc2c1cc(cc2N3CCCCS3(=O)=O)C(=O)NC(Cc4cccc4)C(CNC(C)(C)c5cccc(c5)C(F)(F)F)O  | 6.96285 |
| 526152 | CCn1c2cc(cc(c2n1)N3CCCC3=O)C(=O)NC(Cc4cccc4)C(CNC(C)(C)c5cccc(c5)OC)O            | 6.96913 |
| 529474 | CCc1cn(c2c1cc(cc2N3CCCC3=O)C(=O)NC(Cc4cccc4)C(CNC(C)(C)c5cccc(c5)C(F)(F)F)O)C    | 6.97479 |
| 538747 | CC(C)Nc1cc(cc(c1)N2CCCCS2(=O)=O)C(=O)NC(Cc3cccc3)C(CNC4CCCC4)O                   | 6.98822 |
| 540084 | CCc1c[nH]c2c1cc(cc2N3CCCC3=O)C(=O)NC(Cc4cccc4)C(CNC5CCCC5)O                      | 6.9931  |
| 541922 | CCCNCC(C(Cc1cccc1)NC(=O)c2cc3c(cn4c3c(c2)N(S(=O)(=O)CC4)C)CC)O                   | 6.9936  |
| 536553 | CCc1cn2c3c1cc(cc3N(S(=O)(=O)CC2)C)C(=O)NC(Cc4cccc4)C(CNC5CC5)O                   | 7.00431 |
| 532978 | CCc1cn2c3c1cc(cc3N(S(=O)(=O)CC2)CC)C(=O)NC(Cc4cccc4)C(CNC5CCOCC5)O               | 7.00525 |
| 530371 | CCc1cc(c(c(c1)N2CCCC2=O)F)C(=O)NC(Cc3cccc3)C(CNC(C)(C)c4cccc(c4)OC)O             | 7.01907 |
| 534014 | CCc1cn2c3c1cc(cc3N(S(=O)(=O)C2)C)C(=O)NC(Cc4cccc4)C(CNC5CCOCC5)O                 | 7.05705 |
| 531093 | CCc1cn2c3c1cc(cc3N(S(=O)(=O)C2)C)C(=O)NC(Cc4cccc4)C(CNC5CCCC5)O                  | 7.06005 |
| 538365 | CCc1cn2c3c1cc(cc3N(S(=O)(=O)CC2)C(C)C)C(=O)NC(Cc4cccc4)C(CNC5CCOCC5)O            | 7.07782 |
| 422010 | CCNc1cc(cc(c1)N2CCCC2=O)C(=O)NC(Cc3cccc3)C(CNC4CCCC4)O                           | 7.07886 |
| 529614 | CCc1cn2c3c1cc(cc3N(S(=O)(=O)CC2)CC)C(=O)NC(Cc4cccc4)C(CNC5CCCC5)O                | 7.09387 |
| 537706 | CC(C)Nc1cc(cc(c1)N2CCCCS2(=O)=O)C(=O)NC(Cc3cccc3)C(CNC(C)(C)c4cccc(c4)C(F)(F)F)O | 7.10037 |
| 536260 | CS(=O)(=O)N(c1cccc1)c2cc(cc(c2)N3CCCC3=O)C(=O)NC(Cc4cccc4)C(CNC5CCCC5)O          | 7.10754 |
| 541845 | CCc1cn2c3c1cc(cc3N(S(=O)(=O)CC2)C)C(=O)NC(Cc4cccc4)C(CNC(C)CC)O                  | 7.12805 |
| 527848 | CCN(C)c1cc(cc(c1)N2CCCC2=O)C(=O)NC(Cc3cccc3)C(CNC(C)(C)c4cccc(c4)OC)O            | 7.13677 |
| 541234 | CCc1cn2c3c1cc(cc3N(S(=O)(=O)CC2)C)C(=O)NC(Cc4cccc(c4)F)C(CNC5CCOCC5)O            | 7.16707 |

|        |                                                                                         |         |
|--------|-----------------------------------------------------------------------------------------|---------|
| 527286 | CCc1cn2c3c1cc(cc3N(S(=O)(=O)CC2)C)C(=O)NC(Cc4cccc4)C(CNC5CCCC5)O                        | 7.1749  |
| 542262 | CCNc1cc(cc(c1)N2CCCS2(=O)=O)C(=O)NC(Cc3cccc3)C(CNC45CCC(CC4)CC5)O                       | 7.19892 |
| 538525 | CCc1cn2c3c1cc(cc3N(S(=O)(=O)C2)C)C(=O)NC(Cc4cccc4)C(CNC(C)(C)c5cccc(c5)OC)O             | 7.20944 |
| 539591 | CC(C)CCCC(C)NCC(C(Cc1cccc1)NC(=O)c2cc(cc(c2)N(c3cccc3)S(=O)(=O)C)N4CCCC4=O)O            | 7.23386 |
| 535065 | CCc1cn2c3c1cc(cc3N(S(=O)(=O)CC2)C)C(=O)NC(Cc4cccc(c4)Cl)C(CNC5CCCC5)O                   | 7.2434  |
| 540165 | CC(C)c1cn2c3c1cc(cc3N(S(=O)(=O)CC2)C)C(=O)NC(Cc4cccc4)C(CNC5CCOCC5)O                    | 7.26374 |
| 540708 | CCNc1cc(cc(c1)N2CCCS2=O)C(=O)NC(Cc3cccc3)C(CNC(C)c4cccc4)O                              | 7.26524 |
| 535845 | CCC(c1cccc(c1)Cl)NCC(C(Cc2cccc2)NC(=O)c3cc(cc(c3)N4CCCCS4(=O)=O)NCC)O                   | 7.28651 |
| 531019 | CCc1cn2c3c1cc(cc3N(S(=O)(=O)CC2)C)C(=O)NC(Cc4cccc4)C(CNC5CCOCC5)O                       | 7.3213  |
| 531425 | CCc1cn2c3c1cc(cc3N(S(=O)(=O)CC2)C)C(=O)NC(Cc4cccc4)C(CNC5CCCC5)O                        | 7.32892 |
| 529989 | CCc1cn2c3c1cc(cc3N(S(=O)(=O)CC2)C)C(=O)NC(Cc4cccc(c4)Cl)C(CNC5CCOCC5)O                  | 7.35459 |
| 535438 | CCNc1cc(cc(c1)N2CCCS2(=O)=O)C(=O)NC(Cc3cccc3)C(CNCc4cc(cc(c4)OC)OC)O                    | 7.36686 |
| 528183 | CCn1ccc2c1cc(cc2N3CCCS3(=O)=O)C(=O)NC(Cc4cccc4)C(CNC(C)(C)c5cccc(c5)OC)O                | 7.38093 |
| 539972 | CCc1cn2c3c1cc(cc3N(S(=O)(=O)CC2)C)C(=O)NC(Cc4cccc4)C(CNCC(C)C)O                         | 7.42497 |
| 541055 | CCCN(CCC)C(=O)c1cc(cc(c1)N2CCCS2(=O)=O)C(=O)NC(Cc3cccc3)C(CNC(C)(C)c4cccc(c4)C(F)(F)F)O | 7.44141 |
| 532648 | CCc1cn(c2c1cc(cc2N3CCCS3=O)C(=O)NC(Cc4cccc4)C(CNC(C)(C)c5cccc(c5)OC)O)C                 | 7.44309 |
| 525238 | CCC(c1cccc(c1)Cl)NCC(C(Cc2cccc2)NC(=O)c3cc(cc(c3)N4CCCC4=O)C5CCCC5)O                    | 7.45357 |
| 531046 | CCc1cn2c3c1cc(cc3N(S(=O)(=O)CC2)C)C(=O)NC(Cc4cc(cc(c4)F)F)C(CNC5CCCC5)O                 | 7.4616  |
| 531951 | CCNc1cc(cc(c1)N2CCCS2(=O)=O)C(=O)NC(Cc3cccc3)C(CNC45CCC(C4)CC5)O                        | 7.46733 |
| 526988 | CCc1cn2c3c1cc(cc3N(S(=O)(=O)CC2)C)C(=O)NC(Cc4cc(cc(c4)F)F)C(CNC5CCOCC5)O                | 7.47334 |
| 538572 | CCC(c1cccc(c1)Cl)NCC(C(Cc2cccc2)NC(=O)c3cc(cc(c3)N4CCCC4=O)NCC)O                        | 7.50026 |
| 537823 | CCc1cn2c3c1cc(cc3N(S(=O)(=O)CC2)CC)C(=O)NC(Cc4cccc4)C(CNC5CCCC5)O                       | 7.5038  |
| 527527 | CC(C)c1cn2c3c1cc(cc3N(S(=O)(=O)CC2)C)C(=O)NC(Cc4cccc4)C(CNC5CCCC5)O                     | 7.52328 |
| 530157 | CCCN(CCC)C(=O)c1cc(cc(c1)N2CCCS2(=O)=O)C(=O)NC(Cc3cccc3)C(CNC(C)(C)c4cccc(c4)OC)O       | 7.52625 |
| 542347 | CCc1cn2c3c1cc(cc3N(S(=O)(=O)CC2)C)C(=O)NC(Cc4cccc(c4)F)C(CNC5CCCC5)O                    | 7.52679 |
| 529190 | CCc1cn2c3c1cc(cc3N(S(=O)(=O)CC2)CC(F)(F)F)C(=O)NC(Cc4cccc4)C(CNC5CCOCC5)O               | 7.52836 |
| 542400 | CC(C)(c1cccc(c1)OC)NCC(C(Cc2cccc2)NC(=O)c3cc(cc(c3)N4CCCCS4(=O)=O)C5CCCC5)O             | 7.53831 |

(d)

| COMPOUND_ID | CANONICAL_SMILES                                                                                 | pXC50_3D7 |
|-------------|--------------------------------------------------------------------------------------------------|-----------|
| 542494      | <chem>Cn1cccc1C(=O)Nc2cccc(c2)c3c(c4ccccc4n3)c5ccnc(n5)Nc6ccc7c(c6)OCCO7</chem>                  | 5.86943   |
| 541917      | <chem>c1ccn2c(c1)c(c(n2)c3cccc(c3)NC(=O)c4c(ccc(c4Cl)F)F)c5ccnc(n5)Nc6cccc(c6)F</chem>           | 5.94376   |
| 537852      | <chem>CCN(CC)C(=O)Nc1ccc(cc1)c2c(c3ccccc3n2)c4ccnc(n4)Nc5cccc(c5)CCN(CC)CCO</chem>               | 5.95522   |
| 535475      | <chem>Cc1c(nc2cc(ccc2n1)Nc3nccc(n3)c4c5ccccc5nc4c6cccc(c6)NC(=O)c7c(cccc7F)F)C</chem>            | 5.97177   |
| 540627      | <chem>Cc1ccc(c(c1F)C(=O)Nc2cccc(c2)c3c(c4ccccc4n3)c5ccnc(n5)Nc6cccc(c6)F)F</chem>                | 5.97735   |
| 530976      | <chem>CCS(=O)(=O)c1ccc(c(c1)Nc2nccc(n2)c3c4ccccc4nc3c5cccc(c5)NC(=O)c6c(cccc6F)F)OC</chem>       | 5.98621   |
| 537456      | <chem>COc1cc(ccc1Nc2nccc(n2)c3c4ccccc4nc3c5cccc(c5)NC(=O)c6c(cccc6F)F)CS(=O)(=O)C</chem>         | 6.01483   |
| 528728      | <chem>c1ccc(cc1)Nc2nccc(n2)c3c4ccccc4nc3c5cccc(c5)NC(=O)c6cc(cccc6F)F</chem>                     | 6.02089   |
| 536215      | <chem>COCCOc1ccc(cc1F)Nc2nccc(n2)c3c4ccccc4nc3c5cccc(c5)NC(=O)c6c(cccc6F)F</chem>                | 6.02235   |
| 526244      | <chem>c1ccn2c(c1)c(c(n2)c3cccc(c3)NC(=O)c4c(ccc(c4F)F)F)c5ccnc(n5)Nc6cccc(c6)F</chem>            | 6.06776   |
| 529314      | <chem>c1ccn2c(c1)c(c(n2)c3cccc(c3)NC(=O)c4c(cccc4F)F)c5ccnc(n5)Nc6ccc(cc6)S(=O)(=O)N</chem>      | 6.11785   |
| 528162      | <chem>COc1cccc(c1C(=O)Nc2cccc(c2)c3c(c4ccccc4n3)c5ccnc(n5)Nc6cccc(c6)F)OC</chem>                 | 6.12543   |
| 539818      | <chem>c1ccc(cc1)Nc2nccc(n2)c3c4ccccc4nc3c5cccc(c5)NC(=O)c6c(cccc6F)F</chem>                      | 6.13899   |
| 533988      | <chem>c1ccc(cc1)Nc2nccc(n2)c3c4ccccc4nc3c5cccc(c5)NC(=O)c6c(cccc6F)F</chem>                      | 6.14546   |
| 538557      | <chem>CCN(CCc1cccc(c1)Nc2nccc(n2)c3c4ccccc4nc3c5ccc(cc5)NC(=O)C(C)C)CCO</chem>                   | 6.14652   |
| 536192      | <chem>c1cc(cc(c1)Nc2nccc(n2)c3c4ccccc4nc3c5cccc(c5)NC(=O)c6c(cccc6F)F</chem>                     | 6.16015   |
| 531996      | <chem>c1cc(cc(c1)NC(=O)c2c(cccc2F)F)c3c(c4ccccc4n3)c5ccnc(n5)Nc6cccc(c6)C(F)(F)F</chem>          | 6.18825   |
| 540895      | <chem>c1ccn2c(c1)c(c(n2)c3cccc(c3)NC(=O)c4c(cccc4F)F)c5ccnc(n5)Nc6cccc(c6)C(F)(F)F</chem>        | 6.20284   |
| 541540      | <chem>CS(=O)(=O)Cc1ccc(cc1)Nc2nccc(n2)c3c4ccccc4nc3c5cccc(c5)C(=O)Nc6c(cccc6F)F</chem>           | 6.27422   |
| 532692      | <chem>c1cc(cc(c1)NC(=O)c2c(cccc2F)F)c3c(c4ccccc4n3)c5ccnc(n5)Nc6cccnc6</chem>                    | 6.27732   |
| 527610      | <chem>c1ccc(cc1)C(=O)Nc2cccc(c2)c3c(c4ccccc4n3)c5ccnc(n5)Nc6cccc(c6)NC(=O)CN</chem>              | 6.36502   |
| 537393      | <chem>c1ccn2c(c1)c(c(n2)c3cccc(c3)NC(=O)c4c(cccc4F)F)c5ccnc(n5)Nc6ccc(cc6)C(=O)NC7CC7</chem>     | 6.38632   |
| 531772      | <chem>CCN(CC)CCCOc1ccc(cc1F)Nc2nccc(n2)c3c4ccccc4nc3c5cccc(c5)NC(=O)c6c(cccc6F)F</chem>          | 6.39017   |
| 537901      | <chem>c1ccn2c(c1)c(c(n2)c3cccc(c3)NC(=O)c4c(cccc4F)F)c5ccnc(n5)Nc6ccc(cc6)C(=O)N7CCOCC7</chem>   | 6.41678   |
| 530352      | <chem>c1ccn2c(c1)c(c(n2)c3cccc(c3)C(=O)Nc4c(cccc4F)F)c5ccnc(n5)Nc6cccc(c6)c7cnc7</chem>          | 6.44294   |
| 532490      | <chem>COCCOc1ccc(cc1Cl)Nc2nccc(n2)c3c4ccccc4nc3c5cccc(c5)NC(=O)c6c(cccc6F)F</chem>               | 6.44845   |
| 529489      | <chem>c1ccn2c(c1)c(c(n2)c3cccc(c3)NC(=O)c4c(cccc4F)F)c5ccnc(n5)Nc6ccc(cc6)C7ccncc7</chem>        | 6.52886   |
| 535721      | <chem>COc1ccc(cc1Cl)Nc2nccc(n2)c3c4ccccc4nc3c5cccc(c5)NC(=O)c6c(cccc6F)F</chem>                  | 6.54657   |
| 533918      | <chem>c1ccn2c(c1)c(c(n2)c3cccc(c3)NC(=O)C4CCCC4)c5ccnc(n5)Nc6cccc(c6)c7cnc7</chem>               | 6.58361   |
| 525000      | <chem>c1ccn2c(c1)c(c(n2)c3cccc(c3)NC(=O)c4c(cccc4F)F)c5ccnc(n5)Nc6ccc(c(c6)F)NCCCN7CCOCC7</chem> | 6.58634   |
| 537016      | <chem>c1ccn2c(c1)c(c(n2)c3cccc(c3)NC(=O)c4cc(ccc4F)F)c5ccnc(n5)Nc6cccc(c6)N7CCCC7=O</chem>       | 6.67305   |
| 539070      | <chem>CS(=O)(=O)Cc1ccc(cc1)Nc2nccc(n2)c3c4ccccc4nc3c5cccc(c5)NC(=O)C6CCCC6</chem>                | 6.69738   |
| 535316      | <chem>c1ccn2c(c1)c(c(n2)c3cccc(c3)NC(=O)c4c(cccc4F)F)c5ccnc(n5)Nc6ccc(cc6)c7cc[nH]n7</chem>      | 6.7232    |
| 527534      | <chem>CC(=O)Nc1cccc(c1)Nc2nccc(n2)c3c4ccccc4nc3c5cccc(c5)NC(=O)c6c(cccc6F)F</chem>               | 6.73558   |
| 541552      | <chem>COc1cccc(c1)Nc2nccc(n2)c3c4ccccc4nc3c5cccc(c5)NC(=O)c6c(cccc6F)F</chem>                    | 6.74895   |
| 535061      | <chem>c1cc(cc(c1)Nc2nccc(n2)c3c4ccccc4nc3c5cccc(c5)NC(=O)c6c(cccc6F)F)c7cnc7</chem>              | 6.77915   |
| 525581      | <chem>CS(=O)(=O)Cc1ccc(cc1)Nc2nccc(n2)c3c4ccccc4nc3c5cccc(c5)NC(=O)c6c(cccc6F)F</chem>           | 6.79041   |
| 529853      | <chem>c1cc(cc(c1)NC(=O)c2c(cccc2F)F)c3c(c4ccccc4n3)c5ccnc(n5)Nc6ccc(cc6)N7CCOCC7</chem>          | 6.8018    |
| 535289      | <chem>CS(=O)(=O)Cc1ccc(cc1)Nc2nccc(n2)c3c4ccccc4nc3c5cccc(c5)NC(=O)c6c(cccc6F)F</chem>           | 6.82424   |
| 525025      | <chem>CN1CCN(CC1)c2ccc(cc2)Nc3nccc(n3)c4c5ccccc5nc4c6cccc(c6)NC(=O)c7c(cccc7F)F</chem>           | 6.94981   |
| 530125      | <chem>COc1cc(cc(c1OC)OC)Nc2nccc(n2)c3c4ccccc4nc3c5cccc(c5)NC(=O)c6c(cccc6F)F</chem>              | 7.11189   |
| 535545      | <chem>c1ccn2c(c1)c(c(n2)c3cccc(c3)NC(=O)c4c(cccc4F)F)c5ccnc(n5)Nc6cccc(c6)S(=O)(=O)N</chem>      | 7.1329    |
| 527930      | <chem>c1ccn2c(c1)c(c(n2)c3cccc(c3)NC(=O)c4c(cccc4F)F)c5ccnc(n5)Nc6cccc(c6)CCS(=O)(=O)N</chem>    | 7.23367   |
| 525205      | <chem>CC(c1cccc(c1)Nc2nccc(n2)c3c4ccccc4nc3c5cccc(c5)NC(=O)c6c(cccc6F)F)S(=O)(=O)C</chem>        | 7.24057   |
| 532918      | <chem>CC(c1cccc(c1)Nc2nccc(n2)c3c4ccccc4nc3c5cccc(c5)NC(=O)c6c(cccc6F)F)S(=O)(=O)C</chem>        | 7.34109   |
| 525842      | <chem>COc1cc(cc(c1OC)OC)Nc2nccc(n2)c3c4ccccc4nc3c5cccc(c5)NC(=O)c6c(cccc6F)F</chem>              | 7.4867    |

(e)

| COMPOUND_ID | CANONICAL_SMILES                                                                  | pXC50_3D7 |
|-------------|-----------------------------------------------------------------------------------|-----------|
| 541977      | <chem>Cc1cccc2c1[nH]c(n2)c3ccc(cc3)c4cccc(c4)CN5CCC(CC5)C(=O)N</chem>             | 5.75142   |
| 527260      | <chem>c1ccc(cc1)CN2CCC(CC2)C(=O)Nc3ccc(cc3)c4[nH]c5ccccc5n4</chem>                | 5.75415   |
| 537743      | <chem>Cc1cccc2c1[nH]c(n2)c3ccc(s3)c4ccc(cc4)NC(=O)c5ccccc5)NC(=O)C</chem>         | 5.75873   |
| 542486      | <chem>c1ccc2c(c1)[nH]c(n2)c3cccc(c3)c4ccc(cc4)CNC5CC5</chem>                      | 5.77892   |
| 533656      | <chem>CN1CCN(CC1)CC(=O)Nc2ccc(cc2)c3cc(s3)c4[nH]c5ccccc5n4</chem>                 | 5.80679   |
| 533658      | <chem>c1cc(cc(c1)C(=O)NCCN2CCCC2)c3ccc(s3)c4[nH]c5ccc(cc5n4)F</chem>              | 5.8144    |
| 526983      | <chem>Cc1cc(oc1C)CN2CCC(CC2)C(=O)Nc3ccc(cc3)c4[nH]c5ccccc5n4</chem>               | 5.83815   |
| 532628      | <chem>Cc1ccc(o1)CN2CCC(CC2)C(=O)Nc3ccc(cc3)c4cc5ccccc5[nH]4</chem>                | 5.8462    |
| 541152      | <chem>Cc1cccc2c1[nH]c(n2)c3ccc(s3)c4cccc(c4)CN5CCN(CC5)c6ccc(cn6)C#N</chem>       | 5.84909   |
| 528876      | <chem>c1ccc(cc1)n2ncc(n2)CNCc3ccc(cc3)c4ccc(s4)c5[nH]c6ccccc6n5</chem>            | 5.8526    |
| 532676      | <chem>c1cc(cc(c1)c2[nH]c3ccc(cc3n2)F)c4ccc(cc4)C(=O)N5CCCCC5CN6CCC(C6)O</chem>    | 5.85295   |
| 537180      | <chem>CN1CCN(CC1)Cc2ccc(cc2)c3cccc(c3)c4[nH]c5ccccc5n4</chem>                     | 5.85789   |
| 526614      | <chem>c1ccc2c(c1)[nH]c(n2)c3ccc(cc3)NC(=O)C4CCCN(C4)C5CCC5</chem>                 | 5.87007   |
| 529088      | <chem>COC(=O)c1ccc2c(c1)[nH]c(n2)c3ccc(cc3)C=CC(=O)Nc4ccc(c(c4)Cl)Cl</chem>       | 5.87282   |
| 529128      | <chem>c1ccc2c(c1)[nH]c(n2)c3cccc(c3)c4ccc(cc4)CN5CCCC(C5)O</chem>                 | 5.87286   |
| 530587      | <chem>c1ccc(cc1)n2ncc(n2)CNCc3ccc(cc3)c4cccc(c4)c5[nH]c6ccc(cc6n5)C(F)(F)F</chem> | 5.87521   |
| 531298      | <chem>Cc1cccc2c1[nH]c(n2)c3ccc(cc3)c4ccc(cc4)NC(=O)NCc5ccc(cc5)F</chem>           | 5.87591   |
| 536119      | <chem>Cc1cccc2c1[nH]c(n2)c3cccc(c3)c4ccc(cc4)C(=O)NCc5nccn5C</chem>               | 5.87788   |
| 539124      | <chem>CC(CN(C)C)C(=O)Nc1ccc(cc1)c2cc(sc2)c3[nH]c4cccc4n3</chem>                   | 5.88092   |
| 538157      | <chem>Cc1cccc2c1[nH]c(n2)c3ccc(cc3)c4ccc(cc4)NC(=O)NCc5ccc(cc5)F</chem>           | 5.88475   |
| 527939      | <chem>CN1CCN(CC1)CC(=O)Nc2ccc(cc2)c3cccc(c3)c4[nH]c5ccccc5n4</chem>               | 5.88986   |
| 525952      | <chem>Cc1cccc2c1[nH]c(n2)c3ccc(s3)c4cccc(c4)CN5CCC(CC5)C(=O)N</chem>              | 5.89958   |
| 540901      | <chem>CC(=O)Nc1ccc(cc1)c2cc(c(nc2)N)c3[nH]c4cc(ccc4n3)OC</chem>                   | 5.90554   |
| 531213      | <chem>c1ccc2c(c1)[nH]c(n2)c3ccc(cc3)c4cccc(c4)CN5CCN(CC5)c6ccc(cn6)C#N</chem>     | 5.90665   |
| 542156      | <chem>c1ccc(cc1)n2ncc(n2)CNCc3ccc(cc3)c4cccc(c4)c5[nH]c6ccccc6n5</chem>           | 5.90974   |
| 542453      | <chem>Cc1cccc2c1[nH]c(n2)c3ccc(cc3)c4cccc(c4)CNCCN5CCNCC5</chem>                  | 5.91101   |
| 539359      | <chem>Cn1cccc1CCNc2ccc(cc2)c3cccc(c3)c4[nH]c5ccc(cc5n4)F</chem>                   | 5.91208   |
| 536253      | <chem>Cc1ccoc1C(=O)Nc2cccc(c2)c3cccc(c3)c4[nH]c5ccccc5n4</chem>                   | 5.91326   |
| 531417      | <chem>Cc1cccc2c1[nH]c(n2)c3ccc(cc3)c4cccc(c4)CNCCNS(=O)(=O)C</chem>               | 5.91391   |
| 533917      | <chem>Cn1cccc1CCNc2ccc(cc2)c3cccc(c3)c4[nH]c5ccccc5n4</chem>                      | 5.9169    |
| 530485      | <chem>Cc1ccc(cc1S(=O)(=O)N2CCOCC2)C(=O)Nc3ccc(cc3)c4[nH]c5ccccc5n4</chem>         | 5.91879   |
| 533326      | <chem>Cc1cccc2c1[nH]c(n2)c3cccc(c3)c4ccc(cc4)C(=O)NCCc5ccc(c(=O)[nH]5)O</chem>    | 5.92315   |
| 537470      | <chem>Cc1cccc2c1[nH]c(n2)c3cccc(c3)c4ccc(cc4)NC(=O)COC(C)C</chem>                 | 5.92582   |
| 533339      | <chem>Cc1cc2c(cc1C)nc([nH]2)c3ccc(cc3)C(=O)NCCC4CCCC4</chem>                      | 5.92952   |
| 542339      | <chem>c1ccc2c(c1)[nH]c(n2)c3ccc(s3)c4cccc(c4)CNCC5CCCO5</chem>                    | 5.93011   |
| 526441      | <chem>Cc1cccc2c1[nH]c(n2)c3cccc(c3)c4cccc(c4)CN5CCN(CC5)c6ccc(cn6)C#N</chem>      | 5.93523   |
| 534846      | <chem>Cc1cccc2c1[nH]c(n2)c3ccc(s3)c4ccc(cc4)CNCCN5CCNCC5</chem>                   | 5.93856   |
| 541374      | <chem>Cc1cccc2c1[nH]c(n2)c3ccc(s3)c4cccc(c4)C(=O)NCCN5CCCC5</chem>                | 5.94396   |
| 536932      | <chem>c1ccc2c(c1)[nH]c(n2)c3ccc(cc3)NC(=O)C=Cc4ccccc4</chem>                      | 5.94428   |
| 542649      | <chem>Cc1cccc2c1[nH]c(n2)c3ccc(s3)c4ccc(cc4)CN5CCN(CC5)c6ccc(cn6)C#N</chem>       | 5.94581   |
| 536620      | <chem>CNCCNc1ccc(cc1)c2cccc(c2)c3[nH]c4ccc(cc4n3)F</chem>                         | 5.94764   |
| 539822      | <chem>Cc1cccc2c1[nH]c(n2)c3ccc(cc3)c4cccc(c4)NC(=O)c5ccccc5)C(=O)N</chem>         | 5.9482    |
| 526227      | <chem>c1cc(ccc1)CNCCN2CCNCC2)c3ccc(cc3)c4[nH]c5ccc(cc5n4)C(F)(F)F</chem>          | 5.94924   |
| 537636      | <chem>c1cc(cc(c1)c2[nH]c3ccc(cc3n2)F)c4ccc(cc4)NC(=O)NCc5ccc(cc5)F</chem>         | 5.94951   |
| 528071      | <chem>Cc1cccc2c1[nH]c(n2)c3ccc(s3)c4cccc(c4)NC(=O)c5c(nns5)C</chem>               | 5.95078   |
| 529941      | <chem>c1ccc2c(c1)[nH]c(n2)c3cccc(n3)c4[nH]c5ccccc5n4</chem>                       | 5.95268   |
| 535153      | <chem>COCCN1CCN(CC1)Cc2ccc(cc2)c3cccc(c3)c4[nH]c5ccccc5n4</chem>                  | 5.95355   |
| 539648      | <chem>c1cc(cc(c1)NC(=O)c2c[nH]cn2)c3ccc(s3)c4[nH]c5ccc(cc5n4)C(F)(F)F</chem>      | 5.95603   |
| 541907      | <chem>Cn1cc(nc1)CCNC(=O)c2ccc(cc2)c3cccc(c3)c4[nH]c5ccccc5n4</chem>               | 5.95744   |
| 528285      | <chem>c1ccc2c(c1)[nH]c(n2)c3ccc(cc3)NC(=O)C4CCN(CC4)Cc5ccccc5)F</chem>            | 5.95901   |
| 533877      | <chem>CN1CCC(CC1)C(=O)Nc2cccc(c2)c3ccc(cc3)c4[nH]c5ccccc5n4</chem>                | 5.96088   |
| 527776      | <chem>Cc1cccc2c1[nH]c(n2)c3cccc(c3)c4ccc(cc4)NC(=O)Cc5ccccc5</chem>               | 5.96337   |
| 531602      | <chem>Cc1cccc2c1[nH]c(n2)c3cccc(c3)c4ccc(cc4)NC(=O)C(C(C)C)NC(=O)C</chem>         | 5.96374   |
| 529402      | <chem>c1ccc2c(c1)[nH]c(n2)c3ccc(s3)c4ccc(cc4)CN5CCN(CC5)c6ccc(cn6)C#N</chem>      | 5.96492   |
| 524989      | <chem>c1ccc2c(c1)[nH]c(n2)c3ccc(cc3)c4cccc(c4)CNCCN5CCNCC5</chem>                 | 5.96609   |
| 541399      | <chem>CS(=O)(=O)NCCCNc1ccc(c1)c2ccc(s2)c3[nH]c4cccc4n3</chem>                     | 5.96756   |
| 541971      | <chem>c1ccc2c(c1)[nH]c(n2)c3ccc(cc3)c4cccc(c4)NC(=O)c5csnn5</chem>                | 5.96952   |
| 540752      | <chem>c1ccc(cc1)C2CC2NC(=O)Nc3cccc(c3)c4cccc(c4)c5[nH]c6ccccc6n5</chem>           | 5.97077   |

|        |                                                                          |         |
|--------|--------------------------------------------------------------------------|---------|
| 530742 | CN(CCN)Cc1ccc(cc1)c2ccc(s2)c3[nH]c4ccc(cc4n3)F                           | 5.97209 |
| 539598 | c1cc(cc(c1)c2[nH]c3ccc(cc3n2)C(F)(F)F)c4ccc(cc4)NC(=O)c5ccc(=O)[nH]n5    | 5.97234 |
| 534779 | CCNC(=O)Nc1ccc(cc1)c2ccc(s2)c3[nH]c4c(cccc4n3)C                          | 5.97239 |
| 528721 | Cc1cc2c(cc1C)nc([nH]2)c3ccc(cc3)OCC(=O)NCc4ccc(cc4)C(C)(C)C              | 5.97465 |
| 529718 | c1cc(cc(c1)c2cccc(c2)c3[nH]c4ccc(cc4n3)F)CN5CCN(CC5)c6cnccn6             | 5.97489 |
| 535216 | c1ccc2c(c1)[nH]c(n2)c3ccc(cc3)c4cccc(c4)NC(=O)c5cnn6c5nccc6              | 5.97615 |
| 526807 | CC(CN(C)C)C(=O)Nc1cccc(c1)c2cccc(c2)c3[nH]c4cccc4n3                      | 5.97619 |
| 538310 | c1ccc2c(c1)[nH]c(n2)c3ccc(s3)c4ccc(cc4)NC(=O)Cc5c[nH]cn5                 | 5.97648 |
| 536354 | c1cc(cc(c1)F)CNC(=O)Nc2cccc(c2)c3ccc(cc3)c4[nH]c5ccc(cc5n4)F             | 5.97708 |
| 530654 | c1cc(ccc1c2[nH]c3ccc(c(cc3n2)F)F)C(=O)NCc4ccc(c(c4)Cl)Cl                 | 5.97817 |
| 537149 | c1ccc2c(c1)[nH]c(n2)c3ccc(s3)c4ccc(cc4)CNC5CC5                           | 5.97877 |
| 533123 | c1ccc2c(c1)[nH]c(n2)c3ccc(s3)c4ccc(cc4)C(=O)N5CCCC5CN6CCC(C6)O           | 5.97982 |
| 532787 | Cc1cccc2c1[nH]c(n2)c3cccc(c3)c4ccc(cc4)NC(=O)CN5CCOCC5                   | 5.98079 |
| 530002 | c1ccc2c(c1)[nH]c(n2)c3ccc(s3)c4cccc(c4)CN5CCCC5CN                        | 5.98161 |
| 536297 | c1cc(cc(c1)c2[nH]c3ccc(cc3n2)C(F)(F)F)c4cccc(c4)NC(=O)CNC(=O)c5ccc(cc5)O | 5.98171 |
| 530690 | c1cc(cc(c1)c2ccc(s2)c3[nH]c4ccc(cc4n3)C(F)(F)F)CNCCN5CCNCC5              | 5.98183 |
| 532677 | c1ccc2c(c1)[nH]c(n2)c3ccc(s3)c4cccc(c4)CNCC5CCCO5                        | 5.98208 |
| 527641 | c1cc(cc(c1)c2ccc(s2)c3[nH]c4ccc(cc4n3)C(F)(F)F)CN5CCN(CC5)c6ccc(cc6)C#N  | 5.98276 |
| 527965 | c1ccc2c(c1)[nH]c(n2)c3ccc(cc3)c4cccc(c4)NC(=O)c5cccnc5                   | 5.98364 |
| 535280 | CCNC(=O)Nc1cccc(c1)c2cccc(c2)c3[nH]c4c(cccc4n3)C                         | 5.98374 |
| 531659 | Cc1c(sc(n1)C)CC(=O)Nc2ccc(cc2)c3ccc(s3)c4[nH]c5ccc(cc5n4)C(F)(F)F        | 5.98694 |
| 527950 | Cc1cccc2c1[nH]c(n2)c3cccc(c3)c4cccc(c4)NC(=O)CC5c6cccc6C(=O)N5           | 5.98717 |
| 538876 | c1cc(cc(c1)c2ccc(cc2)c3[nH]c4ccc(cc4n3)C(F)(F)F)CNCCN5CCNCC5             | 5.9883  |
| 535364 | c1cc(ccc1c2[nH]c3ccc(cc3n2)F)C(=O)NCc4ccc(c(c4)Cl)Cl                     | 5.98831 |
| 531714 | CC(C)C(C(=O)Nc1ccc(cc1)c2ccc(s2)c3[nH]c4ccc(cc4n3)C(F)(F)F)NC(=O)C       | 5.98853 |
| 528739 | c1ccc2c(c1)[nH]c(n2)c3ccc(cc3)c4cccc(c4)NC(=O)Cc5c[nH]cn5                | 5.98932 |
| 535014 | c1ccc2c(c1)[nH]c(n2)c3ccc(cc3)c4cccc(c4)CN5CCN(CC5)CCC#N                 | 5.98972 |
| 536271 | Cc1cccc2c1[nH]c(n2)c3ccc(s3)c4ccc(cc4)NC(=O)CN5CCN(CC5)C                 | 5.99079 |
| 532783 | Cc1cccc2c1[nH]c(n2)c3ccc(s3)c4cccc(c4)CNCCNS(=O)(=O)C                    | 5.99296 |
| 528863 | c1ccc2c(c1)[nH]c(n2)c3cccc(c3)c4ccc(cc4)CNCCN5CCCC5=O                    | 5.99352 |
| 525038 | CS(=O)(=O)NCCCNc1ccc(c1)c2cc(sc2)c3[nH]c4cccc4n3                         | 5.99362 |
| 535853 | CC(CN1CCN(CC1)C)C(=O)Nc2cccc(c2)c3cccc(c3)c4[nH]c5cccc5n4                | 5.99431 |
| 539570 | CCOc1cccc(c1)C(=O)Nc2ccc(cc2)c3[nH]c4cccc4n3                             | 5.99695 |
| 526615 | COCC1CCCN1Cc2ccc(cc2)c3ccc(s3)c4[nH]c5cccc5n4                            | 5.99888 |
| 530128 | CC(=O)N(C)c1cccc(c1)C(=O)Nc2cccc(c2)c3ccc(cc3)c4[nH]c5ccc(cc5n4)C(F)(F)F | 5.99919 |
| 541948 | Cc1cccc2c1[nH]c(n2)c3cccc(c3)c4ccc(cc4)NC(=O)C(C)C(=O)NC(C)C             | 5.99995 |
| 535030 | Cc1cccc2c1[nH]c(n2)c3cccc(c3)c4ccc(cc4)NC(=O)CS(=O)(=O)C                 | 5.99995 |
| 542552 | Cc1cccc2c1[nH]c(n2)c3ccc(s3)c4ccc(cc4)CNCCNS(=O)(=O)C                    | 6.00043 |
| 526128 | Cc1cccc2c1[nH]c(n2)c3ccc(cc3)c4cccc(c4)NC(=O)c5cnccc5C(F)(F)F            | 6.00108 |
| 529270 | CN(CCN)Cc1cccc(c1)c2ccc(s2)c3[nH]c4ccc(cc4n3)C(F)(F)F                    | 6.0013  |
| 528190 | CS(=O)(=O)NCCCNc1ccc(c1)c2ccc(cc2)c3[nH]c4ccc(cc4n3)C(F)(F)F             | 6.0019  |
| 534254 | c1cc(cc(c1)N)CNCc2ccc(cc2)c3ccc(s3)c4[nH]c5ccc(cc5n4)F                   | 6.00349 |
| 524505 | c1ccc(cc1)NC(=O)c2c[nH]cn2                                               | 6.00404 |
| 539952 | Cc1cccc2c1[nH]c(n2)c3cccc(c3)c4cccc(c4)NC(=O)CNC(=O)c5ccc(cc5)O          | 6.00449 |
| 534991 | Cc1cc2c(cc1C)nc([nH]2)c3ccc(cc3)OCC(=O)NCc4cccc(c4)C(F)(F)F              | 6.00516 |
| 525982 | CC(=O)Nc1nc(cs1)C(=O)Nc2cccc(c2)c3ccc4c(c3)cn4COC                        | 6.00554 |
| 536813 | c1ccc2c(c1)[nH]c(n2)c3cccc(c3)c4cccc(c4)NC(=O)CNc5ccc(cc5)C(=O)N         | 6.00568 |
| 539032 | Cc1cccc2c1[nH]c(n2)c3ccc(s3)c4cccc(c4)CNCc5ccc(cc5)NC                    | 6.00568 |
| 528451 | CN1CCC(CC1)C(=O)Nc2ccc(cc2)c3ccc(s3)c4[nH]c5ccc(cc5n4)C(F)(F)F           | 6.00568 |
| 531891 | CC(C)(C)c1ccc2c(c1)nc([nH]2)c3ccc(cc3)C=CC(=O)NCc4cccc(c4)C(F)(F)F       | 6.00621 |
| 531474 | c1cc(cc(c1)O)CC(=O)Nc2ccc(cc2)c3cccc(c3)c4[nH]c5ccc(cc5n4)C(F)(F)F       | 6.00726 |
| 525991 | COc1cc(cc(c1OC)OC)C(=O)Nc2ccc(cc2)c3[nH]c4cccc4n3                        | 6.00789 |
| 532200 | c1ccc2c(c1)C(CC(=O)N2)C(=O)Nc3cccc(c3)c4cccc(c4)c5[nH]c6cccc6n5          | 6.00856 |
| 542329 | CNCc1ccc(c(c1)C(=O)OC)c2cccc(c2)CNCc3ccc(cc3)c4cccc4                     | 6.00871 |
| 525179 | Cn1ccnc1CNC(=O)c2ccc(cc2)c3cccc(c3)c4[nH]c5ccc(cc5n4)F                   | 6.00879 |
| 535395 | c1ccc(c(c1)C(=O)N)OCC(=O)Nc2ccc(cc2)c3cccc(c3)c4[nH]c5ccc(cc5n4)C(F)(F)F | 6.00966 |
| 540248 | Cc1cccc2c1[nH]c(n2)c3ccc(cc3)c4cccc(c4)NC(=O)C(=O)c5cccn5C               | 6.01047 |
| 536596 | CN1CCC(CC1)C(=O)Nc2ccc(cc2)c3ccc(cc3)c4[nH]c5cccc5n4                     | 6.01055 |
| 527323 | Cc1cccc2c1[nH]c(n2)c3ccc(s3)c4cccc(c4)CNCC5CCCO5                         | 6.01214 |
| 527783 | c1cc(cc(c1)c2[nH]c3ccc(cc3n2)F)c4ccc(cc4)CN5CCN(CC5)CCC#N                | 6.01245 |
| 535685 | c1ccc(cc1)n2ncc(n2)CNCc3cccc(c3)c4cccc(c4)c5[nH]c6ccc(cc6n5)F            | 6.01287 |



|        |                                                                          |         |
|--------|--------------------------------------------------------------------------|---------|
| 529862 | CC(=O)N(C)C1CCN(C1)Cc2ccc(cc2)c3ccc(s3)c4[nH]c5ccc(cc5n4)F               | 6.01289 |
| 527348 | Cc1cccc2c1[nH]c(n2)c3cccc(c3)c4cccc(c4)CNCCN5CCNCC5                      | 6.01331 |
| 536823 | c1cc(cc(c1)NC(=O)c2c[nH]cn2)c3ccc(cc3)c4[nH]c5ccc(cc5n4)C(F)(F)F         | 6.01487 |
| 530377 | CC(C1CCCN1C(=O)c2ccc(cc2)c3ccc(s3)c4[nH]c5ccccc5n4)O                     | 6.01502 |
| 535295 | c1cc(ccc1CN2CCN(CC2)c3ccc(cn3)C#N)c4ccc(cc4)c5[nH]c6ccc(cc6n5)C(F)(F)F   | 6.01624 |
| 536862 | c1cc(cc(c1)c2cccc(c2)c3[nH]c4ccc(cc4n3)C(F)(F)F)CN5CCN(CC5)c6ccc(cn6)C#N | 6.01669 |
| 535206 | c1cc(cc(c1)NC(=O)c2ccc(cc2)c3ccc(cc3)c4[nH]c5ccc(cc5n4)F                 | 6.01676 |
| 533545 | Cc1ccc2c(c1C)nc([nH]2)c3ccc(cc3)C(=O)NC4CCCC(C4)F                        | 6.01676 |
| 542906 | Cc1cccc2c1[nH]c(n2)c3ccc(s3)c4ccc(cc4)C(=O)NCCc5cn(cn5)C                 | 6.01762 |
| 541295 | c1cc(cc(c1)c2cccc(c2)c3[nH]c4ccc(cc4n3)F)CN5CCN(CC5)c6ccc(cn6)C#N        | 6.01802 |
| 533897 | c1cc(ccc1CN2CCCC2CN)c3ccc(cc3)c4[nH]c5ccc(cc5n4)C(F)(F)F                 | 6.01807 |
| 539234 | c1ccc2c(c1)[nH]c(n2)c3cccc(c3)c4cccc(c4)CNCCN5CCNCC5                     | 6.01839 |
| 530085 | c1ccc2c(c1)C(=O)CC(=O)Nc3ccc(cc3)c4cccc(c4)c5[nH]c6ccc(cc6n5)C(F)(F)F    | 6.01864 |
| 527332 | CC(=O)N(C)C1CCN(C1)Cc2cccc(c2)c3ccc(cc3)c4[nH]c5ccc(cc5n4)F              | 6.01887 |
| 534856 | Cc1cccc2c1[nH]c(n2)c3cccc(c3)c4ccc(cc4)CNCCN5CCCC5=O                     | 6.01954 |
| 534568 | Cc1cccc2c1[nH]c(n2)c3cccc(c3)c4cccc(c4)NC(=O)c5cccnc5C                   | 6.01972 |
| 525644 | CC(CN1CCN(CC1)C)C(=O)Nc2ccc(cc2)c3ccc(cc3)c4[nH]c5ccccc5n4               | 6.02028 |
| 541207 | Cc1cccc2c1[nH]c(n2)c3ccc(s3)c4cccc(c4)CNCCNC                             | 6.02101 |
| 530750 | c1cc(cc(c1)NC(=O)CCc2cccnc2)c3ccc(s3)c4[nH]c5ccc(cc5n4)C(F)(F)F          | 6.02104 |
| 525922 | c1cc(cc(c1)c2[nH]c3ccc(cc3n2)C(F)(F)F)c4ccc(cc4)NC(=O)NCc5ccc(cc5)F      | 6.0241  |
| 536193 | c1ccc2c(c1)[nH]c(n2)c3ccc(cc3)NC(=O)C4CCCN(C4)CC5CC5                     | 6.02414 |
| 526545 | CN(CCNCc1ccc(cc1)c2cccc(c2)c3[nH]c4cccc(c4n3)S(=O)(=O)C                  | 6.02457 |
| 536524 | CC(CN1CCN(CC1)C)C(=O)Nc2cccc(c2)c3ccc(cc3)c4[nH]c5ccccc5n4               | 6.02556 |
| 529630 | Cc1cccc2c1[nH]c(n2)c3ccc(s3)c4cccc(c4)CN5CCCC(C5)O                       | 6.02596 |
| 525134 | Cn1cc(nc1)CCNC(=O)c2cccc(c2)c3ccc(cc3)c4[nH]c5ccc(cc5n4)F                | 6.02659 |
| 540031 | c1ccc2c(c1)[nH]c(n2)c3ccc(s3)c4ccc(cc4)C(=O)NCCN5CCCC5                   | 6.02781 |
| 536774 | CS(=O)(=O)NCCCNCCc1cccc(c1)c2cccc(c2)c3[nH]c4ccc(cc4n3)F                 | 6.02794 |
| 538324 | c1ccc2c(c1)[nH]c(n2)c3ccc(s3)c4ccc(cc4)CN5CCN(CC5)Cc6cccnc6              | 6.02798 |
| 529910 | c1cc(cc(c1)c2cccc(c2)c3[nH]c4ccc(cc4n3)C(F)(F)F)CNCCN5CCNCC5             | 6.02842 |
| 531720 | Cc1cccc2c1[nH]c(n2)c3ccc(s3)c4cccc(c4)CN5CCC(CC5)CO                      | 6.02903 |
| 529192 | CS(=O)(=O)NCCCNCCc1ccc(cc1)c2ccc(cc2)c3[nH]c4ccc(cc4n3)F                 | 6.02937 |
| 529962 | c1ccc2c(c1)[nH]c(n2)c3ccc(s3)c4ccc(cc4)CN5CCC5CN                         | 6.02962 |
| 537577 | Cc1cccc2c1[nH]c(n2)c3ccc(cc3)c4ccc(cc4)CN5CCC(CC5)C(=O)N                 | 6.03068 |
| 541103 | c1ccc2c(c1)[nH]c(n2)c3ccc(cc3)c4ccc(cc4)NC(=O)Nc5ccc(cc5)Cl              | 6.03246 |
| 530198 | CCn1cc(cn1)CN2CCCC(C2)C(=O)Nc3ccc(cc3)c4[nH]c5ccccc5n4                   | 6.03311 |
| 534007 | c1cc(ccc1CN2CCCC2CN)c3ccc(cc3)c4[nH]c5ccc(cc5n4)F                        | 6.03335 |
| 540247 | Cc1c(sc(n1)C)CC(=O)Nc2ccc(cc2)c3cccc(c3)c4[nH]c5ccc(cc5n4)C(F)(F)F       | 6.03386 |
| 533734 | c1cc(cc(c1)c2[nH]c3ccc(cc3n2)F)c4ccc(cc4)NC(=O)CCc5cccnc5                | 6.0351  |
| 526192 | Cc1cccc2c1[nH]c(n2)c3cccc(c3)c4ccc(cc4)CN5c5cnn(n5)c6ccccc6              | 6.03557 |
| 526309 | c1ccc2c(c1)[nH]c(n2)c3cccc(c3)c4cccc(c4)NC(=O)c5csnn5                    | 6.03592 |
| 540798 | Cc1cccc(n1)CN2CCC(CC2)C(=O)Nc3ccc(cc3)c4[nH]c5ccccc5n4                   | 6.03646 |
| 540736 | c1ccc2c(c1)[nH]c(n2)c3ccc(cc3)c4ccc(cc4)C(=O)NCCN5CCCC5                  | 6.03685 |
| 538136 | CC1CN(CC(O1)C)Cc2ccc(cc2)c3cccc(c3)c4[nH]c5ccc(cc5n4)F                   | 6.03745 |
| 527028 | c1ccc(cc1)n2ncc(n2)CNCc3ccc(cc3)c4cccc(c4)c5[nH]c6ccc(cc6n5)F            | 6.03761 |
| 538900 | c1ccc(cc1)CNCc2c(ccc3c2nc([nH]3)c4cccc(c4)F)O                            | 6.03814 |
| 526450 | Cc1cccc2c1[nH]c(n2)c3ccc(cc3)c4cccc(c4)CN5CCCC5CN                        | 6.03886 |
| 538638 | c1cc(ccc1CNCCN2CCNCC2)c3ccc(s3)c4[nH]c5ccc(cc5n4)C(F)(F)F                | 6.04104 |
| 537166 | c1cc(cc(c1)c2[nH]c3ccc(cc3n2)F)c4ccc(cc4)CN5CCC(CC5)CO                   | 6.04108 |
| 540845 | CC(=CCN1CCC(CC1)C(=O)Nc2ccc(cc2)c3[nH]c4cccc4n3)C                        | 6.04172 |
| 536259 | Cc1cccc2c1[nH]c(n2)c3ccc(cc3)c4cccc(c4)NC(=O)c5cccc(c5)NC(=O)C           | 6.04204 |
| 536863 | c1ccc2c(c1)[nH]c(n2)c3cccc(c3)c4ccc(cc4)CN5CCN(CC5)c6ccc(cn6)C#N         | 6.04207 |
| 538179 | Cc1cccc2c1[nH]c(n2)c3ccc(s3)c4ccc(cc4)CN5CCC(CC5)C(=O)N                  | 6.04221 |
| 539036 | Cc1cccc(c1)NC(=O)Nc2cccc(c2)c3ccc(cc3)c4[nH]c5ccc(cc5n4)C(F)(F)F         | 6.04353 |
| 526419 | c1cc(cc(c1)c2[nH]c3ccc(cc3n2)F)c4ccc(cc4)CNCCN5CCNCC5                    | 6.04389 |
| 524504 | COc1ccc(cc1)OCC(=O)Nc2cc(ccc2Cl)c3[nH]c4cccc4n3                          | 6.04418 |
| 537055 | Cc1cccc2c1[nH]c(n2)c3ccc(cc3)c4cccc(c4)NC(=O)Cc5c[nH]cn5                 | 6.04452 |
| 525265 | c1ccc2c(c1)[nH]c(n2)c3ccc(cc3)NC(=O)c4cccc(c4)S(=O)(=O)N5CCOCC5          | 6.0447  |
| 532510 | Cc1cccc2c1[nH]c(n2)c3cccc(c3)c4ccc(cc4)NC(=O)C5CCCO5                     | 6.04542 |
| 526151 | Cc1cccc2c1[nH]c(n2)c3ccc(s3)c4ccc(cc4)C(=O)NCCN5CCCC5                    | 6.04543 |
| 540106 | c1ccc2c(c1)[nH]c(n2)c3ccc(cc3)c4ccc(cc4)CN5CCC(CC5)CO                    | 6.04654 |
| 543131 | c1ccc(cc1)C2CC2NC(=O)Nc3cccc(c3)c4cccc(c4)c5[nH]c6ccccc6n5               | 6.04656 |

|        |                                                                         |         |
|--------|-------------------------------------------------------------------------|---------|
| 538412 | c1cc(ccc1)c2[nH]c3ccc(cc3n2)F)c4cccc(c4)NC(=O)Cc5cccn(=O)c5             | 6.04699 |
| 530422 | c1cc(ccc1)CNCCCN2CCCC=O)c3ccc(s3)c4[nH]c5ccc(cc5n4)F                    | 6.04774 |
| 530937 | CC(=O)Nc1cccc(c1)C(=O)Nc2cccc(c2)c3ccc(s3)c4[nH]c5ccc(cc5n4)F           | 6.0479  |
| 533561 | c1ccc2c(c1)[nH]c(n2)c3cccc(c3)c4ccc(cc4)NC(=O)NCc5cccc(c5)F             | 6.04866 |
| 542406 | c1cc(ccc1)c2[nH]c3ccc(cc3n2)F)c4ccc(cc4)CN5CCN(CC5)c6cnccn6             | 6.04901 |
| 528308 | c1cc(ccc1)c2ccc(cc2)c3[nH]c4ccc(cc4n3)C(F)(F)F)CNCCN5CCC(C5)N           | 6.04908 |
| 540996 | c1ccc2c(c1)[nH]c(n2)c3ccc(cc3)c4cccc(c4)CN5CCC(C5)N                     | 6.0497  |
| 533795 | CC(C)C(C(=O)Nc1ccc(cc1)c2ccc(cc2)c3[nH]c4ccc(cc4n3)C(F)(F)F)NC(=O)C     | 6.05106 |
| 525507 | Cc1cccc2c1[nH]c(n2)c3cccc(c3)c4ccc(cc4)NC(=O)COc5cccc5C(=O)N            | 6.0511  |
| 534644 | c1ccc2c(c1)[nH]c(n2)c3ccc(cc3)c4cccc(c4)CN5CCCCC5                       | 6.0511  |
| 534512 | c1cc(ccc1)NC(=O)Nc2ccc(c(c2)Cl)Cl)c3ccc(cc3)c4[nH]c5ccc(cc5n4)C(F)(F)F  | 6.0511  |
| 531178 | Cc1c(snn1)C(=O)Nc2cccc(c2)c3ccc(s3)c4[nH]c5ccc(cc5n4)F                  | 6.0513  |
| 534430 | Cc1cccc2c1[nH]c(n2)c3ccc(s3)c4ccc(cc4)NC(=O)NCc5cccc(c5)F               | 6.05208 |
| 528052 | Cc1c(snn1)C(=O)Nc2cccc(c2)c3ccc(s3)c4[nH]c5ccccc5n4                     | 6.05316 |
| 538394 | c1cc(ccc1)c2[nH]c3ccc(cc3n2)F)c4cccc(c4)C(=O)N5CCCCC5CN6CCC(C6)O        | 6.05446 |
| 537570 | c1cc(ccc1)c2[nH]c3ccc(cc3n2)C(F)(F)F)c4ccc(cc4)NC(=O)Cc5cccn(=O)c5      | 6.05466 |
| 525214 | CS(=O)(=O)NCCCNc1ccc(c1)c2ccc(s2)c3[nH]c4ccc(cc4n3)C(F)(F)F             | 6.05554 |
| 540598 | c1cc(ccc1)c2[nH]c3ccc(cc3n2)F)c4ccc(cc4)CN5CCC(CC5)C(=O)N               | 6.05624 |
| 540959 | Cc1cccc2c1[nH]c(n2)c3ccc(s3)c4cccc(c4)C(=O)NCCc5cn(cn5)C                | 6.05679 |
| 538267 | CC1CN(CC(O1)C)Cc2ccc(cc2)c3ccc(s3)c4[nH]c5ccc(cc5n4)F                   | 6.05737 |
| 529914 | Cc1cccc2c1[nH]c(n2)c3ccc(cc3)c4ccc(cc4)NC(=O)NC5CC5c6cccc6              | 6.05737 |
| 535355 | Cc1cccc2c1[nH]c(n2)c3ccc(cc3)c4cccc(c4)NC(=O)c5cnn6c5nccc6              | 6.05934 |
| 530585 | Cn1cncc1C(=O)Nc2cccc(c2)c3ccc(s3)c4[nH]c5ccc(cc5n4)F                    | 6.0596  |
| 531875 | Cc1c(snn1)C(=O)Nc2cccc(c2)c3ccc(cc3)c4[nH]c5ccccc5n4                    | 6.06073 |
| 531604 | c1ccc2c(c1)[nH]c(n2)c3ccc(s3)c4cccc(c4)CN5CCCCC5                        | 6.06087 |
| 535610 | c1ccc2c(c1)[nH]c(n2)c3ccc(s3)c4ccc(cc4)CNCC5CCCO5                       | 6.06091 |
| 533280 | c1cc(ccc1)c2[nH]c3ccc(cc3n2)F)c4ccc(cc4)CN5CCCC(C5)O                    | 6.06149 |
| 541939 | c1cc(ccc1)c2[nH]c3ccc(cc3n2)F)c4cccc(c4)NC(=O)CNc5ccc(cc5)C(=O)N        | 6.06189 |
| 533164 | Cc1cccc2c1[nH]c(n2)c3ccc(s3)c4cccc(c4)CN5CCCCC5CN                       | 6.06196 |
| 536200 | c1cc(ccc1)NC(=O)CCc2cccn2)c3ccc(cc3)c4[nH]c5ccc(cc5n4)C(F)(F)F          | 6.06222 |
| 532539 | Cn1cc(nc1)CCNC(=O)c2ccc(cc2)c3ccc(cc3)c4[nH]c5ccc(cc5n4)F               | 6.06258 |
| 529835 | CS(=O)(=O)c1cccc1CNC(=O)c2ccc(cc2)c3cccc(c3)c4[nH]c5ccc(cc5n4)C(F)(F)F  | 6.06271 |
| 541990 | c1cc(ccc1)c2[nH]c3ccc(cc3n2)F)c4ccc(cc4)NC(=O)c5cccc(c5)C(=O)N          | 6.06279 |
| 533710 | CCCCOc1ccc(cc1)c2[nH]c3cccc3n2                                          | 6.06285 |
| 532296 | CNCCNc1ccc(cc1)c2ccc(s2)c3[nH]c4cccc4n3                                 | 6.0632  |
| 530193 | Cc1cccc2c1[nH]c(n2)c3ccc(cc3)c4ccc(cc4)CN5CCN(CC5)CCC#N                 | 6.06336 |
| 533996 | c1cc(ccc1)c2[nH]c3ccc(cc3n2)C(F)(F)F)c4ccc(cc4)CNCCN5CCNCC5             | 6.06462 |
| 537177 | Cc1cccc2c1[nH]c(n2)c3ccc(cc3)c4cccc(c4)NC(=O)c5cncn5C                   | 6.06501 |
| 530582 | c1ccc2c(c1)[nH]c(n2)c3ccc(s3)c4cccc(c4)CNCCCN5CCC5=O                    | 6.06585 |
| 527387 | c1cc(ccc1)c2[nH]c3ccc(cc3n2)C(F)(F)F)c4ccc(cc4)NC(=O)CNC(=O)c5ccc(cc5)O | 6.06591 |
| 529694 | c1ccc2c(c1)[nH]c(n2)c3cccc(c3)c4cccc(c4)CN5CCCCO5                       | 6.06592 |
| 530925 | Cc1cccc2c1[nH]c(n2)c3ccc(cc3)c4ccc(cc4)CN5CCCC(C5)O                     | 6.06599 |
| 527984 | Cc1cccc2c1[nH]c(n2)c3ccc(s3)c4ccc(cc4)CN5CCN(CC5)CCOC                   | 6.06621 |
| 525383 | Cn1cncc1C(=O)Nc2ccc(cc2)c3cccc(c3)c4[nH]c5ccc(cc5n4)C(F)(F)F            | 6.06663 |
| 540939 | CC1CN(CC(O1)C)Cc2cccc(c2)c3ccc(cc3)c4[nH]c5ccccc5n4                     | 6.0672  |
| 537238 | Cc1cccc2c1[nH]c(n2)c3cccc(c3)c4ccc(cc4)NC(=O)c5ccc(=O)[nH]n5            | 6.06724 |
| 532782 | c1cc(ccc1)CN2CCN(CC2)c3ccc(cc3)C#N)c4ccc(s4)c5[nH]c6ccc(cc6n5)F         | 6.06835 |
| 532910 | c1cc(ccc1)c2ccc(s2)c3[nH]c4ccc(cc4n3)C(F)(F)F)NC(=O)c5ccoc5             | 6.06841 |
| 525315 | CS(=O)(=O)NCCCNc1ccc(cc1)c2cccc(c2)c3[nH]c4ccc(cc4n3)C(F)(F)F           | 6.06852 |
| 539376 | Cn1cncc1C(=O)Nc2cccc(c2)c3ccc(cc3)c4[nH]c5ccccc5n4                      | 6.06856 |
| 537074 | c1cc(ccc1)CN2CCCC(C2)O)c3ccc(cc3)c4[nH]c5ccc(cc5n4)F                    | 6.06879 |
| 537745 | c1cc(ccc1)c2cccc(c2)c3[nH]c4ccc(cc4n3)F)CN5CCC(CC5)C(=O)N               | 6.06892 |
| 541161 | Cc1cccc2c1[nH]c(n2)c3cccc(c3)c4ccc(cc4)CN5CCC(CC5)C(=O)N                | 6.06911 |
| 537229 | Cc1cccc2c1[nH]c(n2)c3ccc(cc3)c4cccc(c4)NC(=O)NCc5cccc(c5)F              | 6.06912 |
| 539539 | COc1ccc(o1)CN2CCC(CC2)C(=O)Nc3ccc(cc3)c4[nH]c5ccccc5n4                  | 6.06922 |
| 539781 | COC(=O)c1ccc2c(c1)[nH]c(n2)c3ccc(cc3)C(=O)NCc4ccc(c4)Cl)Cl              | 6.06964 |
| 537124 | c1cc(ccc1)CN2CCCC(C2)O)c3ccc(s3)c4[nH]c5ccc(cc5n4)F                     | 6.07006 |
| 540113 | c1cc(ccc1)CN2CCC(CC2)CO)c3ccc(s3)c4[nH]c5ccc(cc5n4)F                    | 6.07048 |
| 528100 | c1cc(ccc1)CNCCN2CCNCC2)c3ccc(cc3)c4[nH]c5ccc(cc5n4)F                    | 6.07081 |
| 542384 | c1ccc2c(c1)[nH]c(n2)c3cccc(c3)c4ccc(cc4)CN5CCC(C5)N                     | 6.07118 |
| 535478 | c1ccc2c(c1)[nH]c(n2)c3ccc(cc3)c4cccc(c4)CN5CCCCC5                       | 6.07161 |

|        |                                                                        |         |
|--------|------------------------------------------------------------------------|---------|
| 538012 | CCOC(=O)c1ccc2c(c1)nc([nH]2)c3ccc(cc3)C(=O)NCc4ccc(cc4)C(C)(C)C        | 6.07207 |
| 538748 | c1cc(ccc1CN2CCC(CC2)CO)c3ccc(cc3)c4[nH]c5ccc(cc5n4)F                   | 6.07329 |
| 540292 | c1cc(cc(c1)c2cccc(c2)c3[nH]c4ccc(cc4n3)F)CNCCN5CCNCC5                  | 6.07457 |
| 529777 | CCN(CC(C)O)C(=O)c1ccc(cc1)c2ccc(cc2)c3[nH]c4c(cccc4n3)C                | 6.07555 |
| 525823 | CC(C)(C)c1ccc(cc1)CNC(=O)c2ccc(cc2)c3[nH]c4ccc(cc4n3)C(C)(C)C          | 6.07578 |
| 526142 | Cn1c(ccn1)C(=O)NCCNCc2cccc(c2)c3cc(sc3)c4[nH]c5cccc5n4                 | 6.07584 |
| 531642 | Cc1cccc2c1[nH]c(n2)c3ccc(cc3)c4cccc(c4)CNCCCN5CCCC5=O                  | 6.07588 |
| 538223 | Cc1cccc2c1[nH]c(n2)c3ccc(cc3)c4cccc(c4)NC(=O)c5ccncc5                  | 6.07611 |
| 535298 | c1ccc2c(c1)[nH]c(n2)c3ccc(cc3)c4ccc(cc4)CN5CCCC(C5)O                   | 6.07653 |
| 538560 | c1ccc2c(c1)[nH]c(n2)c3ccc(cc3)NC(=O)C4CCN(CC4)Cc5ccc(cc5)F             | 6.07661 |
| 536585 | Cc1c(snn1)C(=O)Nc2ccc(cc2)c3cccc(c3)c4[nH]c5ccc(cc5n4)C(F)(F)F         | 6.0767  |
| 540686 | Cn1cccc1C(=O)C(=O)Nc2ccc(cc2)c3ccc(cc3)c4[nH]c5ccc(cc5n4)F             | 6.07687 |
| 541321 | Cc1cccc2c1[nH]c(n2)c3ccc(s3)c4cccc(c4)NC(=O)CCc5c[nH]cn5               | 6.07696 |
| 525422 | CC(CN1CCN(CC1)C)C(=O)Nc2ccc(cc2)c3cc(sc3)c4[nH]c5cccc5n4               | 6.07703 |
| 539568 | COc1cccc(c1)c2cc([nH]n2)C(=O)Nc3ccc4c(c3)nc([nH]4)c5cccc5              | 6.07758 |
| 531595 | COc1ccc2c(c1)cc([nH]2)C(=O)Nc3ccc4c(c3)nc([nH]4)c5cccc5                | 6.07875 |
| 538597 | Cc1cccc2c1[nH]c(n2)c3cccc(c3)c4cccc(c4)C(=O)NCCCN5CCCC5                | 6.07929 |
| 527515 | Cc1cnc(cn1)C(=O)Nc2ccc(cc2)c3cccc(c3)c4[nH]c5cccc5n4                   | 6.07951 |
| 536358 | c1cc(cc(c1)c2[nH]c3ccc(cc3n2)C(F)(F)F)c4ccc(cc4)CN5CCCC5CN             | 6.07955 |
| 538925 | CN1CCN(CC1)CC(=O)Nc2ccc(cc2)c3cccc(c3)c4[nH]c5ccc(cc5n4)F              | 6.0798  |
| 536030 | CNCCNCc1cccc(c1)c2ccc(s2)c3[nH]c4cccc4n3                               | 6.0809  |
| 538673 | Cc1cccc2c1[nH]c(n2)c3ccc(s3)c4ccc(cc4)CN5CCCC(C5)O                     | 6.08092 |
| 538543 | c1ccc2c(c1)[nH]c(n2)c3ccc(cc3)c4cccc(c4)CN5CCC(C5)N                    | 6.08104 |
| 531810 | c1cc(cc(c1)c2[nH]c3ccc(cc3n2)C(F)(F)F)c4ccc(cc4)NC(=O)c5ccoc5          | 6.08121 |
| 527464 | Cc1cccc2c1[nH]c(n2)c3cccc(c3)c4ccc(cc4)NC(=O)C5CCN(CC5)C               | 6.0816  |
| 534070 | c1ccc2c(c1)[nH]c(n2)c3cccc(c3)c4cccc(c4)CN5CCCC5                       | 6.08189 |
| 533998 | Cc1c(sc(n1)C)CC(=O)Nc2cccc(c2)c3cccc(c3)c4[nH]c5ccc(cc5n4)C(F)(F)F     | 6.0823  |
| 538788 | CC(CN(C)C)C(=O)Nc1cccc(c1)c2cccc(c2)c3[nH]c4ccc(cc4n3)F                | 6.08318 |
| 531594 | Cc1cccc2c1[nH]c(n2)c3ccc(cc3)c4ccc(cc4)NC(=O)Nc5ccc(c(c5)Cl)Cl         | 6.0832  |
| 537523 | Cc1cccc2c1[nH]c(n2)c3ccc(s3)c4cccc(c4)NC(=O)CN5CCN(CC5)C               | 6.08322 |
| 533542 | Cc1c(snn1)C(=O)Nc2ccc(cc2)c3ccc(s3)c4[nH]c5cccc5n4                     | 6.08373 |
| 541523 | CNCCNCc1cccc(c1)c2ccc(s2)c3[nH]c4ccc(cc4n3)C(F)(F)F                    | 6.08456 |
| 536384 | Cc1cccc2c1[nH]c(n2)c3cccc(c3)c4ccc(cc4)CN5CCN(CC5)CCO                  | 6.0846  |
| 536285 | c1ccc(cc1)CNCc2cccc(c2)c3ccc(cc3)c4[nH]c5cccc5n4                       | 6.08509 |
| 525779 | CCC(C)NC(=O)Nc1ccc(cc1)c2cccc(c2)c3[nH]c4cccc4n3                       | 6.08565 |
| 541772 | CN(C)CCCN1CCN(CC1)Cc2ccc(cc2)c3ccc(s3)c4[nH]c5cccc5n4                  | 6.08598 |
| 542119 | Cc1cccc2c1[nH]c(n2)c3ccc(cc3)c4ccc(cc4)NC(=O)C(=O)c5cccn5C             | 6.08652 |
| 526416 | CC(C)(C)c1ccc(cc1)CNC(=O)c2ccc(cc2)c3[nH]c4ccc(cc4n3)Cl                | 6.08687 |
| 539725 | Cc1cccc2c1[nH]c(n2)c3cccc(c3)c4ccc(cc4)CNCC#C                          | 6.08704 |
| 530273 | C1ccc(cc1)CNCc2cccc(c2)c3ccc(s3)c4[nH]c5cccc5n4                        | 6.08723 |
| 537940 | Cn1ncc1C(=O)Nc2ccc(cc2)c3cccc(c3)c4[nH]c5ccc(cc5n4)F                   | 6.08724 |
| 535960 | Cc1cccc2c1[nH]c(n2)c3ccc(cc3)c4ccc(cc4)CN5CCOCC5                       | 6.08734 |
| 537081 | CN1CCC(CC1)C(=O)Nc2ccc(cc2)c3ccc(s3)c4[nH]c5cccc5n4                    | 6.08808 |
| 529819 | COc1ccc(cc1)CNCc2cccc(c2)c3ccc(s3)c4[nH]c5cccc5n4                      | 6.08821 |
| 533299 | Cc1cccc2c1[nH]c(n2)c3ccc(cc3)c4ccc(cc4)CN5CCCC5CN                      | 6.08899 |
| 537103 | CC(=O)Nc1ncc(s1)C(=O)Nc2cccc(c2)c3cccc(c3)c4[nH]c5cccc5n4              | 6.08916 |
| 526272 | c1cc(ccc1CN2CCN(CC2)c3ccc(cn3)C#N)c4ccc(s4)c5[nH]c6ccc(cc6n5)C(F)(F)F  | 6.08924 |
| 538470 | c1ccc2c(c1)[nH]c(n2)c3ccc(cc3)NC(=O)c4cc(cnc4)Br                       | 6.08962 |
| 535301 | c1ccc2c(c1)[nH]c(n2)c3cccc(c3)c4ccc(cc4)CN5CCC(CC5)CO                  | 6.08995 |
| 535593 | c1cc(cc(c1)c2cccc(c2)c3[nH]c4ccc(cc4n3)F)CN5CCCC5CN                    | 6.09004 |
| 542664 | Cc1cccc2c1[nH]c(n2)c3ccc(s3)c4ccc(cc4)CN5CCC(CC5)CO                    | 6.09025 |
| 543103 | CS(=O)(=O)NCCCNc1ccc(cc1)c2ccc(s2)c3[nH]c4ccc(cc4n3)F                  | 6.09077 |
| 540945 | c1cc(ccc1CN2CCC(CC2)C(=O)N)c3ccc(cc3)c4[nH]c5ccc(cc5n4)F               | 6.09181 |
| 534623 | CS(=O)(=O)c1cccc1CNC(=O)c2cccc(c2)c3ccc(cc3)c4[nH]c5ccc(cc5n4)C(F)(F)F | 6.09182 |
| 529269 | CCC(C)NC(=O)Nc1cccc(c1)c2cccc(c2)c3[nH]c4c(cccc4n3)C                   | 6.09199 |
| 524736 | c1ccc(cc1)c2ccc(cc2)c3[nH]c4cccc4n3                                    | 6.09204 |
| 539311 | Cc1cccc2c1[nH]c(n2)c3ccc(cc3)c4ccc(cc4)CN5CCCC5CO                      | 6.09277 |
| 542242 | CC(CN1CCN(CC1)C)C(=O)Nc2cccc(c2)c3ccc(cc3)c4[nH]c5ccc(cc5n4)F          | 6.09293 |
| 524977 | Cc1cc2c(cc1)nc([nH]2)c3ccc(cc3)C(=O)NCc4cccc(c4)C(F)(F)F               | 6.09325 |
| 532453 | c1cc(cc(c1)NC(=O)C)c2c[nH]cn2)c3ccc(cc3)c4[nH]c5ccc(cc5n4)F            | 6.09348 |
| 530277 | C#CCCC(=O)Nc1cccc(c1)c2cccc(c2)c3[nH]c4ccc(cc4n3)C(F)(F)F              | 6.09405 |

|        |                                                                     |         |
|--------|---------------------------------------------------------------------|---------|
| 537239 | CS(=O)(=O)NCCCNc1ccc(cc1)c2cccc(c2)c3[nH]c4ccc(cc4n3)F              | 6.09451 |
| 527177 | CCn1cc(c(n1)C)CN2CCCC(C2)C(=O)Nc3ccc(cc3)c4[nH]c5ccccc5n4           | 6.09562 |
| 539071 | c1cc(cc(c1)c2[nH]c3ccc(cc3n2)C(F)(F)F)c4ccc(cc4)NC(=O)c5csnn5       | 6.0958  |
| 541664 | c1ccc2c(c1)[nH]c(n2)c3ccc(cc3)NC(=O)c4ccc(c(c4)N(=O)=O)Cl           | 6.0959  |
| 532061 | COc1cccc(c1)C(=O)Nc2ccc(cc2)c3[nH]c4ccccc4n3                        | 6.09593 |
| 539322 | CC(C)(C)c1ccc2c(c1)nc([nH]2)c3ccc(cc3)C(=O)NCCCc4ccccc4             | 6.09622 |
| 538503 | c1cc(ccc1NC(=O)Nc2[nH]c3ccc(cc3n2)N(=O)=O)Cl                        | 6.09634 |
| 532629 | CC(CN(C)C)C(=O)Nc1cccc(c1)c2ccc(s2)c3[nH]c4ccc(cc4n3)F              | 6.09637 |
| 536202 | Cc1cccc2c1[nH]c(n2)c3ccc(cc3)c4cccc(c4)NC(=O)Nc5ccsc5               | 6.09741 |
| 542877 | CC(C)NCc1cccc(c1)c2cccc(c2)c3[nH]c4ccccc4n3                         | 6.09749 |
| 536795 | c1ccc2c(c1)[nH]c(n2)c3cc(ccs3)c4ccc(cc4)NC(=O)Nc5ccc(cc5)Cl         | 6.09762 |
| 527875 | CC(C1CCCN1C(=O)c2cccc(c2)c3ccc(s3)c4[nH]c5ccccc5n4)O                | 6.09797 |
| 530451 | Cc1cccc2c1[nH]c(n2)c3ccc(cc3)c4cccc(c4)CNCCNC                       | 6.09824 |
| 524774 | c1cc(cc(c1)c2[nH]c3ccc(cc3n2)F)c4ccc(cc4)NC(=O)Cc5c[nH]cn5          | 6.09851 |
| 542252 | Cn1cncc1C(=O)Nc2cccc(c2)c3ccc(s3)c4[nH]c5ccccc5n4                   | 6.09932 |
| 535285 | c1ccc2c(c1)[nH]c(n2)c3ccc(cc3)NC(=O)c4ccc(c(c4)N(=O)=O)N5CCOCC5     | 6.09995 |
| 539845 | c1cc(ccc1CN2CCCC2CN)c3ccc(s3)c4[nH]c5ccc(cc5n4)C(F)(F)F             | 6.10007 |
| 536208 | Cc1cccc2c1[nH]c(n2)c3cccc(c3)c4ccc(cc4)NC(=O)Cc5cccn5               | 6.10086 |
| 536825 | CC(CN1CCN(CC1)C)C(=O)Nc2ccc(cc2)c3ccc(cc3)c4[nH]c5ccc(cc5n4)F       | 6.10132 |
| 531580 | CN1CCC(CC1)C(=O)Nc2ccc(cc2)c3cccc(c3)c4[nH]c5ccc(cc5n4)F            | 6.10153 |
| 541032 | c1ccc2c(c1)[nH]c(n2)c3cccc(c3)c4cccc(c4)CN5CCC(C5)N                 | 6.10246 |
| 536885 | Cc1ccc2c(c1C)[nH]c(n2)c3ccc(cc3)C(=O)NCc4ccc(c(c4)Cl)Cl             | 6.10252 |
| 535840 | Cc1cccc2c1[nH]c(n2)c3cccc(c3)c4cccc(c4)NC(=O)c5ccc(=O)[nH]n5        | 6.10268 |
| 525490 | c1ccc2c(c1)[nH]c(n2)c3ccc(s3)c4ccc(cc4)NC(=O)c5ccncc5               | 6.10273 |
| 531085 | Cc1cccc2c1[nH]c(n2)c3cccc(c3)c4ccc(cc4)NC(=O)c5cccc(c5)NC(=O)C      | 6.10288 |
| 530246 | c1cc(cc(c1)c2[nH]c3ccc(cc3n2)F)c4cccc(c4)NC(=O)c5csnn5              | 6.10364 |
| 529603 | Cc1cccc2c1[nH]c(n2)c3ccc(cc3)c4cccc(c4)NCc5cn6cccn6n5               | 6.10398 |
| 528558 | c1cc(ccc1c2[nH]c3ccc(cc3n2)NC(=O)c4ccc(cc4)Br)NC(=O)c5ccc(cc5)Br    | 6.10444 |
| 542059 | c1ccc(c(c1)C(=O)N)OCC(=O)Nc2cccc(c2)c3ccc(cc3)c4[nH]c5ccccc5n4      | 6.10481 |
| 536696 | CN(CCN)Cc1cccc(c1)c2cccc(c2)c3[nH]c4ccc(cc4n3)F                     | 6.10493 |
| 541959 | Cn1cccc1C(=O)C(=O)Nc2cccc(c2)c3ccc(cc3)c4[nH]c5ccc(cc5n4)C(F)(F)F   | 6.10495 |
| 541060 | c1ccc2c(c1)[nH]c(n2)c3cc(ccc3Cl)NC(=O)c4ccc(o4)c5ccc(cc5)Cl         | 6.10499 |
| 525683 | Cc1cccc2c1[nH]c(n2)c3ccc(cc3)c4ccc(cc4)NC(=O)CN5CCN(CC5)C           | 6.10506 |
| 534278 | c1cc(cc(c1)c2[nH]c3ccc(cc3n2)C(F)(F)F)c4cccc(c4)NC(=O)Cc5cccn(=O)c5 | 6.10581 |
| 529795 | c1ccc(cc1)c2ccc(cc2)CNCCCNc3[nH]c4ccccc4n3                          | 6.10602 |
| 534954 | c1cc(cc(c1)c2ccc(cc2)c3[nH]c4ccc(cc4n3)F)CN5CCCC(C5)O               | 6.10807 |
| 539401 | c1cc(ccc1CNCCN2CCNCC2)c3ccc(s3)c4[nH]c5ccc(cc5n4)F                  | 6.10863 |
| 538301 | c1ccc2c(c1)[nH]c(n2)c3cccc(c3)c4cccc(c4)CN5CCCCC5CO                 | 6.10867 |
| 539482 | c1ccc2c(c1)[nH]c(n2)c3ccc(s3)c4cccc(c4)NC(=O)c5ccncc5               | 6.10887 |
| 529202 | c1cc(cc(c1)c2ccc(cc2)c3[nH]c4ccc(cc4n3)C(F)(F)F)CN5CCCC5CN          | 6.109   |
| 531237 | Cc1cccc2c1[nH]c(n2)c3ccc(cc3)c4cccc(c4)NC(=O)Nc5ccccc5              | 6.10934 |
| 538426 | c1cc(cc(c1)c2[nH]c3ccc(cc3n2)F)c4cccc(c4)NC(=O)Cc5c[nH]cn5          | 6.10948 |
| 537545 | c1cc(cc(c1)C(F)(F)F)CNC(=O)c2ccc(cc2)c3[nH]c4cc(c(cc4n3)F)F         | 6.10989 |
| 538631 | COc1ccc(cc1C(=O)Nc2ccc(cc2)c3[nH]c4ccccc4n3)Cl                      | 6.11118 |
| 542078 | c1cc(cc(c1)c2[nH]c3ccc(cc3n2)F)c4ccc(cc4)C(=O)NCCN5CCCC5            | 6.11142 |
| 526194 | CC(CN(C)C)C(=O)Nc1ccc(cc1)c2ccc(cc2)c3[nH]c4ccc(cc4n3)F             | 6.11167 |
| 540012 | c1cc(cc(c1)NC(=O)Cc2c[nH]cn2)c3ccc(s3)c4[nH]c5ccc(cc5n4)C(F)(F)F    | 6.11203 |
| 525699 | Cc1cccc2c1[nH]c(n2)c3ccc(s3)c4cccc(c4)CN5CCC(C5)N                   | 6.11205 |
| 535250 | Cc1cc2c(cc1)nc([nH]2)c3ccc(cc3)C(=O)NCc4ccc(cc4)C(C)(C)C            | 6.11237 |
| 530869 | CNCCNc1ccc(cc1)c2ccc(s2)c3[nH]c4ccc(cc4n3)F                         | 6.11238 |
| 526757 | c1cc(cc(c1)F)CNC(=O)Nc2ccc(cc2)c3cccc(c3)c4[nH]c5ccc(cc5n4)F        | 6.11261 |
| 542429 | Cc1cnc(cn1)C(=O)Nc2cccc(c2)c3cccc(c3)c4[nH]c5ccc(cc5n4)F            | 6.1131  |
| 525977 | c1ccc(cc1)c2[nH]c3ccc(cc3n2)NC(=O)c4cc(n[nH]4)c5ccc6c(c5)OCCO6      | 6.1143  |
| 526320 | c1cc(cc(c1)F)CNC(=O)Nc2ccc(cc2)c3ccc(cc3)c4[nH]c5ccc(cc5n4)C(F)(F)F | 6.11433 |
| 542279 | Cc1cccc2c1[nH]c(n2)c3ccc(s3)c4ccc(cc4)NC(=O)Nc5ccccc5               | 6.11446 |
| 530323 | c1ccc2c(c1)[nH]c(n2)c3cccc(c3)c4ccc(cc4)CN5CCOCC5                   | 6.11464 |
| 529711 | c1ccc2c(c1)[nH]c(n2)c3ccc(cc3)c4ccc(cc4)CN5CCC(C5)CO                | 6.11485 |
| 533133 | Cc1cccc2c1[nH]c(n2)c3cccc(c3)c4cccc(c4)CN5CCCC5CN                   | 6.115   |
| 531012 | Cc1cccc2c1[nH]c(n2)c3ccc(s3)c4cccc(c4)NC(=O)c5cccc(c5)NC(=O)C       | 6.11516 |
| 542180 | c1cc(cc(c1)F)CNC(=O)Nc2cccc(c2)c3ccc(cc3)c4[nH]c5ccc(cc5n4)C(F)(F)F | 6.11551 |
| 537015 | CCNC(=O)Nc1cccc(c1)c2ccc(s2)c3[nH]c4c(cccc4n3)C                     | 6.11568 |

|        |                                                                         |         |
|--------|-------------------------------------------------------------------------|---------|
| 539014 | Cc1c(snn1)C(=O)Nc2ccc(cc2)c3cccc(c3)c4[nH]c5ccc(cc5n4)F                 | 6.11569 |
| 525376 | CN(C)CCNCc1cccc(c1)c2cccc(c2)c3[nH]c4cccc4n3                            | 6.11589 |
| 534059 | Cc1cccc2c1[nH]c(n2)c3cccc(c3)c4cccc(c4)CNCCNC                           | 6.11591 |
| 527333 | CC(=O)Nc1cccc(c1)C(=O)Nc2cccc(c2)c3ccc(cc3)c4[nH]c5ccc(cc5n4)F          | 6.11685 |
| 540572 | COc1ccc(cc1)NC(=O)Nc2ccc(cc2)c3cccc(c3)c4[nH]c5cccc5n4                  | 6.11708 |
| 529221 | c1ccc(cc1)CN2CCCN(CC2)c3ccc4c(c3)CCN(CC4)Cc5ccc(cc5)c6[nH]ccn6          | 6.11795 |
| 526749 | CC(=O)Oc1ccc(cc1OC)C(=O)Nc2cccc(c2)c3[nH]c4cccc4n3                      | 6.118   |
| 540834 | CC(C)NCc1cccc(c1)c2ccc(cc2)c3[nH]c4cccc4n3                              | 6.11846 |
| 535047 | COCCN1CCN(CC1)Cc2cccc(c2)c3ccc(cc3)c4[nH]c5cccc5n4                      | 6.11859 |
| 525102 | Cc1nc(n(n1)CC(=O)Nc2cccc(c2)c3cccc(c3)c4[nH]c5ccc(cc5n4)C(F)(F)F)C      | 6.11862 |
| 541020 | Cc1ccc2c(c1)nc([nH]2)c3ccc(cc3)NC(=O)c4ccc(c(c4)OC)OC                   | 6.11875 |
| 537500 | c1ccc2c(c1)[nH]c(n2)c3ccc(cc3)c4cccc(c4)NC(=O)Cc5c[nH]cn5               | 6.11876 |
| 525757 | Cc1cccc2c1[nH]c(n2)c3ccc(s3)c4cccc(c4)NC(=O)C(C(C)C)NC(=O)C             | 6.11899 |
| 529187 | Cc1cccc2c1[nH]c(n2)c3cccc(c3)c4ccc(cc4)CN5CCCC5CN                       | 6.11909 |
| 541201 | Cc1cccc2c1[nH]c(n2)c3ccc(s3)c4cccc(c4)NC(=O)NCc5cccc(c5)F               | 6.11938 |
| 528280 | c1ccc2c(c1)[nH]c(n2)c3ccc(s3)c4cccc(c4)CN5CCN(CC5)CCC#N                 | 6.1197  |
| 539514 | c1ccc2c(c1)[nH]c(n2)c3ccc(s3)c4cccc(c4)NC(=O)Cc5c[nH]cn5                | 6.11975 |
| 530493 | c1cc(cc(c1)c2[nH]c3ccc(cc3n2)F)c4ccc(cc4)CN5CCC(C5)N                    | 6.11982 |
| 532335 | Cc1cccc2c1[nH]c(n2)c3ccc(s3)c4cccc(c4)CN5CC(OC(C5)C)C                   | 6.12077 |
| 536482 | CCNC(=O)Nc1ccc(cc1)c2cccc(c2)c3[nH]c4c(ccc4n3)C                         | 6.12143 |
| 527350 | Cc1cccc2c1[nH]c(n2)c3cccc(c3)c4cccc(c4)NC(=O)Cc5c(nc(s5)C)C             | 6.12211 |
| 536979 | Cc1cccc2c1[nH]c(n2)c3cccc(c3)c4ccc(cc4)NC(=O)NC(C)C                     | 6.12265 |
| 526205 | c1ccc2c(c1)[nH]c(n2)c3ccc(cc3)NC(=O)COc4cccc(c4)N(=O)=O                 | 6.12273 |
| 535327 | Cc1cccc1OCC(=O)Nc2ccc(cc2)c3[nH]c4cc5cccc5c4n3                          | 6.1233  |
| 537844 | c1cc(cc(c1)C(=O)NCCN2CCCC2)c3ccc(cc3)c4[nH]c5ccc(cc5n4)C(F)(F)F         | 6.12363 |
| 530412 | c1cc(ccc1c2ccc(s2)c3[nH]c4ccc(cc4n3)C(F)(F)F)C(=O)NCCN5CCCC5            | 6.12372 |
| 528700 | CC(C)CN(C)Cc1ccc(cc1)c2ccc(s2)c3[nH]c4cccc4n3                           | 6.1239  |
| 525971 | Cc1cccc2c1[nH]c(n2)c3ccc(cc3)c4ccc(cc4)CNCc5ccc(cc5)S(=O)(=O)C          | 6.12391 |
| 539903 | c1cc(cc(c1)c2[nH]c3ccc(cc3n2)F)c4ccc(cc4)CN5CCCC5CN                     | 6.12409 |
| 533948 | Cc1cccc2c1[nH]c(n2)c3ccc(s3)c4ccc(cc4)CNCc5cccc(c5)N                    | 6.12437 |
| 529573 | CN(C)CCN(C)Cc1ccc(cc1)c2cccc(c2)c3[nH]c4cccc4n3                         | 6.12449 |
| 533565 | Cc1cccc2c1[nH]c(n2)c3ccc(s3)c4ccc(cc4)CN5CCN(CC5)c6cncn6                | 6.12469 |
| 536794 | Cc1cccc2c1[nH]c(n2)c3cccc(c3)c4ccc(cc4)C(=O)NCc5cccc5S(=O)(=O)C         | 6.12507 |
| 526324 | c1ccc2c(c1)[nH]c(n2)c3ccc(cc3)c4ccc(cc4)CN5CCCCC5                       | 6.12513 |
| 542870 | Cc1cccc2c1[nH]c(n2)c3ccc(s3)c4ccc(cc4)CNCCCN5CCCC5=O                    | 6.12527 |
| 526754 | c1ccc2c(c1)[nH]c(n2)c3ccc(cc3)NC(=O)c4ccc(cc4)S(=O)(=O)N5CCCCC5         | 6.12572 |
| 524567 | c1ccc2c(c1)[nH]c(n2)c3cccc(c3)c4ccc(cc4)CN5CCN(CC5)CCO                  | 6.12579 |
| 537386 | Cc1cccc2c1[nH]c(n2)c3ccc(s3)c4cccc(c4)NC(=O)C(C)CN5CCN(CC5)C            | 6.12615 |
| 533963 | Cc1cccc2c1[nH]c(n2)c3ccc(cc3)c4ccc(cc4)NC(=O)C5CCN(CC5)C                | 6.12629 |
| 525473 | c1cc(cc(c1)c2ccc(s2)c3[nH]c4ccc(cc4n3)C(F)(F)F)CN5CCCC5CN               | 6.12639 |
| 528065 | CC(CN(C)C)C(=O)Nc1ccc(cc1)c2ccc(cc2)c3[nH]c4ccc(cc4n3)C(F)(F)F          | 6.12654 |
| 527219 | c1cc(cc(c1)c2[nH]c3ccc(cc3n2)C(F)(F)F)c4ccc(cc4)NC(=O)Nc5ccc(c(c5)Cl)Cl | 6.12725 |
| 527714 | Cc1cccc2c1[nH]c(n2)c3ccc(cc3)c4cccc(c4)NC(=O)Nc5ccc6c(c5)OCO6           | 6.1279  |
| 534124 | C#CCNCc1ccc(cc1)c2ccc(s2)c3[nH]c4ccc(cc4n3)C(F)(F)F                     | 6.12821 |
| 537505 | c1cc(cc(c1)c2ccc(cc2)c3[nH]c4ccc(cc4n3)C(F)(F)F)CN5CCN(CC5)CCC#N        | 6.12837 |
| 531376 | CC(CN(C)C)C(=O)Nc1cccc(c1)c2ccc(s2)c3[nH]c4cccc4n3                      | 6.12882 |
| 530875 | c1ccc2c(c1)[nH]c(n2)c3ccc(s3)c4ccc(cc4)CN5CCC(C5)N                      | 6.12891 |
| 540830 | Cc1cccc2c1[nH]c(n2)c3cccc(c3)c4cccc(c4)CNCCCN5CCCC5=O                   | 6.12903 |
| 528638 | c1ccc2c(c1)[nH]c(n2)c3ccc(cc3)NC(=O)c4cccc(c4)S(=O)(=O)N5CCCC5          | 6.12905 |
| 530413 | CNCCNCc1cccc(c1)c2ccc(cc2)c3[nH]c4cccc4n3                               | 6.1291  |
| 535116 | c1ccc2c(c1)[nH]c(n2)c3ccc(s3)c4ccc(cc4)CN5CCCCC5                        | 6.12951 |
| 535505 | c1cc(cc(c1)c2[nH]c3ccc(cc3n2)C(F)(F)F)c4ccc(cc4)NC(=O)Cc5c[nH]cn5       | 6.1296  |
| 525600 | CC(C1CCCN1C(=O)c2cccc(c2)c3ccc(cc3)c4[nH]c5ccc(cc5n4)F)O                | 6.12971 |
| 526354 | Cc1cc(cc(c1)C)OCC(=O)Nc2ccc(cc2)c3[nH]c4cccc4n3                         | 6.12985 |
| 527231 | c1ccc2c(c1)[nH]c(n2)c3cccc(c3)c4cccc(c4)NC(=O)Cc5ccc5                   | 6.13008 |
| 539110 | Cc1cccc2c1[nH]c(n2)c3ccc(s3)c4cccc(c4)CNCc5cccc5                        | 6.1301  |
| 534036 | CN1CCN(CC1)CC(=O)Nc2cccc(c2)c3cccc(c3)c4[nH]c5ccc(cc5n4)F               | 6.13017 |
| 524972 | c1ccc2c(c1)CCN2S(=O)(=O)c3ccc(cc3)C(=O)Nc4ccc(cc4)c5[nH]c6cccc6n5       | 6.13029 |
| 525203 | CC(CN(C)C)C(=O)Nc1ccc(cc1)c2ccc(cc2)c3[nH]c4cccc4n3                     | 6.13035 |
| 537586 | CCOC(=O)NCC(=O)Nc1cccc(c1)c2cccc(c2)c3[nH]c4c(cccc4n3)C                 | 6.13087 |
| 529525 | Cc1cccc2c1[nH]c(n2)c3ccc(cc3)c4cccc(c4)NC(=O)C(C)CN5CCN(CC5)C           | 6.13108 |

|        |                                                                          |         |
|--------|--------------------------------------------------------------------------|---------|
| 542478 | c1cc(ccc1)c2[nH]c3ccc(cc3n2)F)c4ccc(cc4)NC(=O)Nc5ccc(c(c5F)F)F           | 6.13113 |
| 533381 | Cc1cccc2c1[nH]c(n2)c3ccc(s3)c4ccc(cc4)CNCC5CCCO5                         | 6.13126 |
| 536808 | COc(=O)C(c1ccc(cc1)O)NC(=O)c2ccc(cc2)c3ccc(s3)c4[nH]c5ccccc5n4           | 6.13215 |
| 533628 | Cc1cccc2c1[nH]c(n2)c3cccc(c3)c4cccc(c4)NC(=O)CCC#C                       | 6.13317 |
| 538105 | CC(=O)Nc1nc(cs1)C(=O)Nc2cccc(c2)c3ccc4c(c3)cnn4CC5CC5                    | 6.13346 |
| 528769 | Cn1cncc1C(=O)Nc2cccc(c2)c3ccc(cc3)c4[nH]c5ccc(cc5n4)F                    | 6.13373 |
| 529723 | c1ccc(cc1)NC(=O)Nc2ccc(cc2)c3cccc(c3)c4[nH]c5ccc(cc5n4)C(F)(F)F          | 6.13403 |
| 536635 | CNc1ccc(cc1)CNCc2cccc(c2)c3ccc(s3)c4[nH]c5ccccc5n4                       | 6.13414 |
| 526478 | c1cc(ccc1)c2ccc(cc2)c3[nH]c4ccc(cc4n3)F)CNCCN5CCC(C5)N                   | 6.13417 |
| 537918 | Cc1cccc2c1[nH]c(n2)c3ccc(s3)c4cccc(c4)NC(=O)COc5ccccc5C(=O)N             | 6.13431 |
| 539772 | Cc1cccc2c1[nH]c(n2)c3cccc(c3)c4ccc(cc4)NC(=O)c5cccn5C                    | 6.13462 |
| 530022 | CC(C)(C)c1ccc2c(c1)nc([nH]2)c3ccc(cc3)C(=O)NCc4cccc(c4)C(F)(F)F          | 6.13489 |
| 532790 | Cc1cccc2c1[nH]c(n2)c3cccc(c3)c4cccc(c4)CNCCc5cccn5C                      | 6.13494 |
| 535042 | Cc1cc(on1)CNC(=O)c2ccc(cc2)c3ccc(s3)c4[nH]c5ccc(cc5n4)C(F)(F)F           | 6.13557 |
| 532478 | Cc1cccc2c1[nH]c(n2)c3ccc(s3)c4ccc(cc4)CNCCNC                             | 6.13572 |
| 531703 | c1cc(ccc1c2ccc(cc2)NC(=O)Cc3c[nH]cn3)c4[nH]c5ccc(cc5n4)F                 | 6.13583 |
| 527220 | Cc1cccc2c1[nH]c(n2)c3ccc(s3)c4ccc(cc4)NC(=O)C(C)CN5CCN(CC5)C             | 6.13596 |
| 534306 | Cc1cccc2c1[nH]c(n2)c3ccc(cc3)c4cccc(c4)CN5CCN(CC5)CCO                    | 6.13688 |
| 534769 | c1ccc2c(c1)[nH]c(n2)c3ccc(cc3)NC(=O)c4cc(c(nc4)Cl)Cl                     | 6.13763 |
| 535712 | c1ccc2c(c1)[nH]c(n2)c3cccc(c3)c4cccc(c4)C(=O)N5CCCC5CN6CCC(C6)O          | 6.13808 |
| 526733 | c1ccc2c(c1)[nH]c(n2)c3ccc(s3)c4cccc(c4)CN5CCC(C5)N                       | 6.13826 |
| 540647 | Cc1cccc2c1[nH]c(n2)c3cccc(c3)c4ccc(cc4)NC(=O)c5c(cco5)C                  | 6.13894 |
| 535709 | Cn1cc(nc1)CCNC(=O)c2ccc(cc2)c3cccc(c3)c4[nH]c5ccc(cc5n4)C(F)(F)F         | 6.13914 |
| 530052 | c1cc(ccc1)c2[nH]c3ccc(cc3n2)C(F)(F)F)c4ccc(cc4)NC(=O)c5cccn5             | 6.13996 |
| 532587 | CC(=O)N(C)c1cccc(c1)C(=O)Nc2ccc(cc2)c3cccc(c3)c4[nH]c5ccc(cc5n4)C(F)(F)F | 6.14019 |
| 541019 | Cc1cccc2c1[nH]c(n2)c3cccc(c3)c4cccc(c4)CN5CCC(CC5)CO                     | 6.14041 |
| 537876 | CN1CCC(CC1)C(=O)Nc2cccc(c2)c3ccc(s3)c4[nH]c5ccc(cc5n4)C(F)(F)F           | 6.14047 |
| 526251 | Cc1cccc2c1[nH]c(n2)c3ccc(s3)c4cccc(c4)NC(=O)C(C)CN(C)C                   | 6.1405  |
| 527684 | Cn1ccnc1CNC(=O)c2ccc(cc2)c3cccc(c3)c4[nH]c5ccc(cc5n4)C(F)(F)F            | 6.14071 |
| 536771 | COc1cc(ccc1OC)OC(=O)Nc2cccc(c2)c3[nH]c4cccc4n3                           | 6.14109 |
| 532477 | c1cc(ccc1)C(=O)NCCN2CCC2)c3ccc(cc3)c4[nH]c5ccc(cc5n4)F                   | 6.14129 |
| 532055 | CC(CN(C)C)C(=O)Nc1ccc(cc1)c2cccc(c2)c3[nH]c4cccc4n3                      | 6.14159 |
| 532342 | c1ccc2c(c1)[nH]c(n2)c3ccc(cc3)c4cccc(c4)CN5CCCC(C5)N                     | 6.14167 |
| 534751 | Cc1cccc2c1[nH]c(n2)c3cccc(c3)c4ccc(cc4)NC(=O)c5c[nH]cn5                  | 6.14167 |
| 532601 | Cc1cccc2c1[nH]c(n2)c3ccc(cc3)c4ccc(cc4)CNCc5ccc(cc5)CN                   | 6.1418  |
| 540973 | c1ccc2c(c1)[nH]c(n2)c3cccc(c3)c4ccc(cc4)CN5CCCC(C5)N                     | 6.14211 |
| 532973 | c1cc(ccc1)c2ccc(cc2)c3[nH]c4ccc(cc4n3)F)CN5CCC(CC5)CO                    | 6.14255 |
| 529133 | Cc1cccc2c1[nH]c(n2)c3cccc(c3)c4ccc(cc4)NC(=O)NC5CC5c6ccccc6              | 6.1433  |
| 533593 | c1cc(ccc1)c2[nH]c3ccc(cc3n2)F)c4ccc(cc4)NC(=O)c5ccncc5                   | 6.14337 |
| 536070 | Cc1cccc2c1[nH]c(n2)c3ccc(s3)c4ccc(cc4)CNCc5cnn(n5)c6ccccc6               | 6.14402 |
| 528800 | c1ccc2c(c1)[nH]c(n2)c3ccc(cc3)c4cccc(c4)CNCc5ccc(cc5)CN                  | 6.14419 |
| 530671 | COCCN1CCN(CC1)Cc2ccc(cc2)c3ccc(cc3)c4[nH]c5ccc(cc5n4)F                   | 6.14422 |
| 540709 | CN(C)CCNCc1ccc(cc1)c2cccc(c2)c3[nH]c4cccc4n3                             | 6.14434 |
| 531070 | CC(CN(C)C)C(=O)Nc1ccc(cc1)c2ccc(s2)c3[nH]c4cccc4n3                       | 6.14449 |
| 529562 | c1cc(ccc1)C(=O)N2CCCC2CN3CCC(C3)O)c4ccc(s4)c5[nH]c6ccc(cc6n5)F           | 6.14549 |
| 541395 | Cc1cccc2c1[nH]c(n2)c3ccc(cc3)c4cccc(c4)NC(=O)Nc5ccccc5                   | 6.14568 |
| 529450 | Cn1cc(n(c1=O)C)C(=O)Nc2cccc(c2)c3cccc(c3)c4[nH]c5ccccc5n4                | 6.14586 |
| 533604 | c1cc(ccc1)NC(=O)c2ccoc2)c3ccc(cc3)c4[nH]c5ccc(cc5n4)C(F)(F)F             | 6.14607 |
| 529545 | Cc1cccc2c1[nH]c(n2)c3ccc(s3)c4ccc(cc4)CN5CCN(CC5)CCO                     | 6.14767 |
| 538319 | c1ccc2c(c1)[nH]c(n2)c3cccc(c3)c4ccc(cc4)CNCc5cccc(c5)N                   | 6.14893 |
| 541686 | Cc1cccc2c1[nH]c(n2)c3cccc(c3)c4cccc(c4)NC(=O)c5cccn5Cl                   | 6.15035 |
| 542550 | c1cc(ccc1)c2cccc(c2)c3[nH]c4ccc(cc4n3)F)CN5CCN(CC5)CCO                   | 6.15101 |
| 532394 | CS(=O)(=O)c1ccc(cc1)CNCc2ccc(cc2)c3ccc(cc3)c4[nH]c5ccc(cc5n4)C(F)(F)F    | 6.1512  |
| 525394 | CN1CCC(CC1)C(=O)Nc2cccc(c2)c3ccc(cc3)c4[nH]c5ccc(cc5n4)F                 | 6.15136 |
| 542239 | c1cc(ccc1)c2[nH]c3ccc(cc3n2)C(F)(F)F)c4ccc(cc4)NC(=O)Nc5ccc(c(c5F)F)F    | 6.1514  |
| 531788 | CC(CN(C)C)C(=O)Nc1cccc(c1)c2ccc(cc2)c3[nH]c4cccc4n3                      | 6.15149 |
| 540938 | c1ccc2c(c1)[nH]c(n2)c3ccc(cc3)c4ccc(cc4)NC(=O)C5c[nH]cn5                 | 6.15155 |
| 532338 | Cc1cccc2c1[nH]c(n2)c3cccc(c3)c4cccc(c4)NC(=O)NC5CC5c6ccccc6              | 6.15162 |
| 536443 | Cc1cnc(cn1)C(=O)Nc2cccc(c2)c3ccc(s3)c4[nH]c5ccc(cc5n4)C(F)(F)F           | 6.15227 |
| 525456 | c1ccc2c(c1)[nH]c(n2)c3cc(c3)c4cccc(c4)CNCCc5cccn5                        | 6.1525  |
| 529927 | Cc1cccc2c1[nH]c(n2)c3cccc(c3)c4ccc(cc4)NC(=O)c5ccoc5                     | 6.15275 |

|        |                                                                           |         |
|--------|---------------------------------------------------------------------------|---------|
| 536343 | c1cc(ccc1)NC(=O)c2ccncc2)c3ccc(s3)c4[nH]c5ccc(cc5n4)F                     | 6.15283 |
| 528909 | CN1CCN(CC1)CC(=O)Nc2cccc(c2)c3ccc(cc3)c4[nH]c5ccc(cc5n4)F                 | 6.15305 |
| 531320 | c1cc(ccc1)c2ccc(cc2)c3[nH]c4ccc(cc4n3)C(F)(F)F)CN5CCN(CC5)c6ccc(cc6)C#N   | 6.15372 |
| 537251 | c1cc(ccc1)NC(=O)Cc2c[nH]cn2)c3ccc(cc3)c4[nH]c5ccc(cc5n4)C(F)(F)F          | 6.15486 |
| 528549 | Cc1cccc2c1[nH]c(n2)c3ccc(cc3)c4cccc(c4)CNCC5CCCO5                         | 6.15512 |
| 527396 | Cn1cc(nc1)CCNC(=O)c2cccc(c2)c3cccc(c3)c4[nH]c5ccc(cc5n4)C(F)(F)F          | 6.15519 |
| 542190 | Cn1ccnc1CNC(=O)c2ccc(cc2)c3ccc(s3)c4[nH]c5ccc(cc5n4)C(F)(F)F              | 6.15596 |
| 543091 | c1cc(ccc1)c2ccc(cc2)c3[nH]c4ccc(cc4n3)C(F)(F)F)CN5CCC(C5)N                | 6.15626 |
| 526444 | c1ccc(cc1)c2[nH]c3ccc(cc3n2)C#N                                           | 6.15628 |
| 530702 | c1cc(ccc1)CN2CCC(CC2)CO)c3ccc(cc3)c4[nH]c5ccc(cc5n4)C(F)(F)F              | 6.15701 |
| 526235 | COc1ccc(cc1)c2cc([nH]n2)C(=O)Nc3ccc4c(c3)nc([nH]4)c5ccccc5                | 6.15734 |
| 526468 | CN1CCN(CC1)CC(=O)Nc2ccc(cc2)c3ccc(cc3)c4[nH]c5ccccc5n4                    | 6.15758 |
| 538281 | Cc1cccc2c1[nH]c(n2)c3cccc(c3)c4ccc(cc4)NC(=O)c5cnc5C(F)(F)F               | 6.15784 |
| 537413 | CN1CCC(CC1)C(=O)Nc2cccc(c2)c3cccc(c3)c4[nH]c5ccc(cc5n4)F                  | 6.15815 |
| 528568 | c1cc(ccc1)c2[nH]c3ccc(cc3n2)F)c4ccc(cc4)NC(=O)Nc5ccsc5                    | 6.15917 |
| 527353 | COC(=O)c1cccc(c1)CNCc2cccc(c2)c3cc(sc3)c4[nH]c5ccccc5n4                   | 6.15925 |
| 530243 | c1cc(ccc1)c2ccc(cc2)NC(=O)CCc3c[nH]cn3)c4[nH]c5ccc(cc5n4)F                | 6.15946 |
| 528627 | CNCCNCc1cccc(c1)c2ccc(cc2)c3[nH]c4ccc(cc4n3)C(F)(F)F                      | 6.15955 |
| 525072 | c1cc(ccc1)c2cccc(c2)c3[nH]c4ccc(cc4n3)F)CNCc5ccccc5)N                     | 6.15961 |
| 533987 | CC(C1CCCN1C(=O)c2cccc(c2)c3ccc(cc3)c4[nH]c5ccc(cc5n4)C(F)(F)F)O           | 6.16105 |
| 539608 | c1ccc2c(c1)[nH]c(n2)c3cccc(c3)c4ccc(cc4)CN5CCCC5                          | 6.16116 |
| 542061 | c1cc(ccc1)c2ccc(cc2)c3[nH]c4ccc(cc4n3)C(F)(F)F)CN5CCCC(C5)O               | 6.16124 |
| 536725 | Cc1cccc2c1[nH]c(n2)c3cccc(c3)c4ccc(cc4)NC(=O)C(C)CN5CCOCC5                | 6.16199 |
| 529731 | Cc1cccc2c1[nH]c(n2)c3cccc(c3)c4ccc(cc4)NC(=O)Cc5c[nH]cn5                  | 6.1626  |
| 531104 | c1cc(ccc1)CN2CCN(CC2)c3cncnc3)c4ccc(cc4)c5[nH]c6ccc(cc6n5)C(F)(F)F        | 6.16325 |
| 533802 | c1cc(ccc1)NC(=O)c2csnn2)c3ccc(cc3)c4[nH]c5ccc(cc5n4)C(F)(F)F              | 6.16367 |
| 532875 | Cc1cccc2c1[nH]c(n2)c3cccc(c3)c4ccc(cc4)NC(=O)C(C)(C)c5ccccc5              | 6.16413 |
| 528016 | Cc1cccc2c1[nH]c(n2)c3cccc(c3)c4ccc(cc4)NC(=O)C5CC(=O)Nc6c5ccccc6          | 6.16429 |
| 530996 | c1ccc2c(c1)[nH]c(n2)c3cc(c3)c4cccc(c4)CNCc5ccccc5)N                       | 6.16437 |
| 532673 | Cc1cccc2c1[nH]c(n2)c3ccc(cc3)c4cccc(c4)CNCCN(C)C                          | 6.16623 |
| 525164 | Cc1cn(c(=O)[nH]c1=O)CC(=O)Nc2cccc(c2)c3cccc(c3)c4[nH]c5ccc(cc5n4)C(F)(F)F | 6.16683 |
| 538542 | Cc1cccc2c1[nH]c(n2)c3ccc(cc3)c4ccc(cc4)NC(=O)C(C)CN(C)C                   | 6.16701 |
| 540995 | c1cc(ccc1)NC(=O)c2ccncc2)c3ccc(s3)c4[nH]c5ccc(cc5n4)C(F)(F)F              | 6.16713 |
| 538995 | Cn1cc(nc1)CCNC(=O)c2ccc(cc2)c3cccc(c3)c4[nH]c5ccc(cc5n4)F                 | 6.16749 |
| 538756 | c1cc(ccc1)CN2CCC(CC2)C(=O)N)c3ccc(cc3)c4[nH]c5ccc(cc5n4)C(F)(F)F          | 6.16779 |
| 525547 | CN1CCN(CC1)CC(=O)Nc2cccc(c2)c3ccc(s3)c4[nH]c5ccc(cc5n4)F                  | 6.16807 |
| 539688 | CCNC(=O)Nc1cccc(c1)c2cccc(c2)c3[nH]c4ccc(cc4n3)C(F)(F)F                   | 6.16847 |
| 533441 | c1ccc2c(c1)[nH]c(n2)c3ccc(cc3)NC(=O)c4ccc(cc4)N(=O)N5CCCC5                | 6.16879 |
| 533330 | Cc1cccc2c1[nH]c(n2)c3ccc(cc3)c4ccc(cc4)CNCC5CCCO5                         | 6.16887 |
| 535439 | c1cc(ccc1)c2[nH]c3ccc(cc3n2)C(F)(F)F)c4cccc(c4)NC(=O)Cc5ccccc5            | 6.1692  |
| 538053 | Cc1cccc2c1[nH]c(n2)c3ccc(cc3)c4ccc(cc4)CNC(C)C                            | 6.17036 |
| 542247 | CN1CCC(CC1)C(=O)Nc2cccc(c2)c3ccc(cc3)c4[nH]c5ccc(cc5n4)C(F)(F)F           | 6.1707  |
| 529017 | Cc1cccc2c1[nH]c(n2)c3cccc(c3)c4cccc(c4)NC(=O)c5c(cco5)C                   | 6.17071 |
| 541434 | Cc1cccc2c1[nH]c(n2)c3cccc(c3)c4cccc(c4)NC(=O)Cc5c[nH]cn5                  | 6.17095 |
| 528825 | c1ccc2c(c1)[nH]c(n2)c3ccc(s3)c4ccc(cc4)CN5CCCC(C5)N                       | 6.1726  |
| 536664 | c1ccc(cc1)CNC(=O)Nc2ccc(cc2)c3ccc(cc3)c4[nH]c5ccc(cc5n4)C(F)(F)F          | 6.1731  |
| 533053 | Cc1cccc2c1[nH]c(n2)c3ccc(s3)c4cccc(c4)NC(=O)Nc5ccc(cc5)OC                 | 6.17328 |
| 533876 | Cc1cccc2c1[nH]c(n2)c3cccc(c3)c4cccc(c4)NC(=O)c5cnn6c5nccc6                | 6.17337 |
| 541341 | c1ccc2c(c1)[nH]c(n2)c3ccc(cc3)c4cccc(c4)NC(=O)Nc5ccc6c(c5)OCO6            | 6.17349 |
| 532655 | Cc1cc(ccc1N(=O)=O)C(=O)Nc2ccc(cc2)c3[nH]c4cccc4n3                         | 6.1735  |
| 532522 | Cc1cccc2c1[nH]c(n2)c3ccc(cc3)c4ccc(cc4)CNCCNC                             | 6.17385 |
| 536799 | CNCCNCc1cccc(c1)c2cccc(c2)c3[nH]c4ccc(cc4n3)F                             | 6.17399 |
| 534523 | c1cc(ccc1)c2ccc(s2)c3[nH]c4ccc(cc4n3)C(F)(F)F)NC(=O)c5c[nH]cn5            | 6.17404 |
| 532141 | Cc1cccc2c1[nH]c(n2)c3ccc(s3)c4ccc(cc4)NC(=O)c5cncn5C                      | 6.17405 |
| 541574 | CC(=O)Nc1ncc(s1)C(=O)Nc2cccc(c2)c3ccc(cc3)c4[nH]c5ccccc5n4                | 6.17466 |
| 535810 | c1cc(ccc1)c2[nH]c3ccc(cc3n2)C(F)(F)F)c4ccc(cc4)NC(=O)c5ccncc5             | 6.17766 |
| 528539 | Cc1cccc2c1[nH]c(n2)c3cccc(c3)c4cccc(c4)CNCC5cnn(n5)c6ccccc6               | 6.17869 |
| 534139 | c1ccc(cc1)CNC(=O)Nc2ccc(cc2)c3cccc(c3)c4[nH]c5ccc(cc5n4)C(F)(F)F          | 6.17908 |
| 533152 | c1cc(ccc1)c2ccc(cc2)c3[nH]c4ccc(cc4n3)C(F)(F)F)CN5CCC(CC5)CO              | 6.1792  |
| 531645 | Cc1cccc2c1[nH]c(n2)c3ccc(s3)c4ccc(cc4)CNCc5ccc(cc5)NC                     | 6.17963 |
| 526022 | Cc1cccc2c1[nH]c(n2)c3ccc(cc3)c4cccc(c4)CNCc5ccc(cc5)NC                    | 6.18013 |

|        |                                                                          |         |
|--------|--------------------------------------------------------------------------|---------|
| 528842 | c1ccc2c(c1)[nH]c(n2)c3cccc(c3)c4cccc(c4)NC(=O)CCc5c[nH]cn5               | 6.18036 |
| 531406 | c1cc(cc(c1)NC(=O)Cc2c[nH]cn2)c3ccc(s3)c4[nH]c5ccc(cc5n4)F                | 6.18038 |
| 540808 | c1cc(ccc1CN2CCN(CC2)CCC#N)c3ccc(s3)c4[nH]c5ccc(cc5n4)F                   | 6.18118 |
| 529824 | Cc1cccc2c1[nH]c(n2)c3cccc(c3)c4cccc(c4)NC(=O)c5cnccc5C(F)(F)F            | 6.18132 |
| 535898 | c1cc(cc(c1)c2[nH]c3ccc(cc3n2)F)c4ccc(cc4)CNCCCN5CCCC5=O                  | 6.18135 |
| 526743 | c1cc(cc(c1)c2[nH]c3ccc(cc3n2)C(F)(F)F)c4cccc(c4)NC(=O)c5cccnc5Cl         | 6.18266 |
| 533191 | c1cc(ccc1c2ccc(s2)c3[nH]c4ccc(cc4n3)C(F)(F)F)NC(=O)Cc5c[nH]cn5           | 6.18275 |
| 531917 | c1cc(cc(c1)c2[nH]c3ccc(cc3n2)C(F)(F)F)c4cccc(c4)NC(=O)c5ccc(=O)[nH]n5    | 6.1831  |
| 532080 | CC(CN(C)C)C(=O)Nc1cccc(c1)c2ccc(cc2)c3[nH]c4ccc(cc4n3)F                  | 6.18479 |
| 525426 | CC(=O)Nc1cccc(c1)C(=O)Nc2cccc(c2)c3ccc(s3)c4[nH]c5ccc(cc5n4)C(F)(F)F     | 6.1855  |
| 541496 | Cc1cccc2c1[nH]c(n2)c3ccc(cc3)c4cccc(c4)NC(=O)C(C)CN(C)C                  | 6.18572 |
| 526659 | c1ccc(cc1)n2ncc(n2)CNCc3cccc(c3)c4ccc(cc4)c5[nH]c6ccc(cc6n5)C(F)(F)F     | 6.18573 |
| 524855 | c1cc(cc(c1)c2[nH]c3ccc(cc3n2)C(F)(F)F)c4ccc(cc4)C(=O)N5CCCCC5CN6CCC(C6)O | 6.18583 |
| 540158 | c1cc(ccc1CN2CCN(CC2)c3cnccn3)c4ccc(s4)c5[nH]c6ccc(cc6n5)C(F)(F)F         | 6.18608 |
| 537207 | Cc1cccc2c1[nH]c(n2)c3cccc(c3)c4ccc(cc4)NC(=O)c5cccc(c5)N(C)C(=O)C        | 6.18612 |
| 525862 | c1ccc2c(c1)[nH]c(n2)c3ccc(cc3)c4cccc(c4)NC(=O)CCc5c[nH]cn5               | 6.18668 |
| 530553 | c1cc(cc(c1)c2[nH]c3ccc(cc3n2)F)c4ccc(cc4)NC(=O)Nc5ccc(c(c5)Cl)Cl         | 6.18885 |
| 535145 | c1ccc(c(c1)C(=O)N)OCC(=O)Nc2cccc(c2)c3ccc(cc3)c4[nH]c5ccc(cc5n4)C(F)(F)F | 6.1892  |
| 530970 | c1cc(cc(c1)c2[nH]c3ccc(cc3n2)F)c4ccc(cc4)NC(=O)c5cnn6c5nccc6             | 6.18921 |
| 526183 | c1cc(ccc1CN2CCC(C2)N)c3ccc(s3)c4[nH]c5ccc(cc5n4)F                        | 6.18979 |
| 525493 | c1ccc2c(c1)[nH]c(n2)c3cccc(c3)c4cccc(c4)NC(=O)c5cccnc5                   | 6.18995 |
| 532801 | COc1ccc(cc1)CNCc2cccc(c2)c3cc(sc3)c4[nH]c5ccccc5n4                       | 6.19034 |
| 539974 | Cc1cccc2c1[nH]c(n2)c3ccc(s3)c4cccc(c4)NC(=O)c5cncn5C                     | 6.19074 |
| 528113 | Cc1cccc2c1[nH]c(n2)c3ccc(cc3)c4cccc(c4)NC(=O)c5cnc(s5)NC(=O)C            | 6.19162 |
| 533644 | c1cc(cc(c1)c2[nH]c3ccc(cc3n2)C(F)(F)F)c4ccc(cc4)CN5CCN(CC5)CCO           | 6.19271 |
| 525790 | c1cc(cc(c1)c2cccc(c2)c3[nH]c4ccc(cc4n3)C(F)(F)F)CN5CCC(CC5)C(=O)N        | 6.19294 |
| 541555 | COc1cccc1NC(=O)Nc2cccc(c2)c3cccc(c3)c4[nH]c5ccccc5n4                     | 6.19314 |
| 539815 | c1cc(cc(c1)c2[nH]c3ccc(cc3n2)F)c4ccc(cc4)CN5CCCC(C5)N                    | 6.19365 |
| 526103 | c1cc(cc(c1)F)CNC(=O)C=Cc2ccc(cc2)c3[nH]c4cc(ccc4n3)Cl                    | 6.19384 |
| 531672 | CCN(CC(C)O)C(=O)c1ccc(cc1)c2cccc(c2)c3[nH]c4c(cccc4n3)C                  | 6.19457 |
| 538377 | CC(CN1CCN(CC1)C)C(=O)Nc2ccc(cc2)c3ccc(s3)c4[nH]c5ccccc5n4                | 6.19538 |
| 529183 | Cc1cnc(cn1)C(=O)Nc2cccc(c2)c3ccc(cc3)c4[nH]c5ccc(cc5n4)F                 | 6.19598 |
| 542396 | c1ccc2c(c1)[nH]c(n2)c3cccc(c3)c4cccc(c4)CN5CCCC(C5)N                     | 6.19612 |
| 526898 | Cc1cccc2c1[nH]c(n2)c3ccc(s3)c4cccc(c4)C(=O)N5CCCCC5C(C)O                 | 6.1963  |
| 532027 | Cn1cncc1C(=O)Nc2cccc(c2)c3cccc(c3)c4[nH]c5ccccc5n4                       | 6.19719 |
| 532920 | Cc1cccc2c1[nH]c(n2)c3cccc(c3)c4cccc(c4)NC(=O)Cc5cccn(=O)c5               | 6.19725 |
| 528636 | CC(=O)Nc1cccc(c1)C(=O)Nc2ccc(cc2)c3cccc(c3)c4[nH]c5ccc(cc5n4)F           | 6.19829 |
| 532131 | Cc1cccc2c1[nH]c(n2)c3ccc(s3)c4cccc(c4)NC(=O)c5ccc(cc5)CC(=O)NC           | 6.19906 |
| 530509 | CC(CN1CCN(CC1)C)C(=O)Nc2cccc(c2)c3ccc(s3)c4[nH]c5ccccc5n4                | 6.19929 |
| 539583 | Cc1cccc2c1[nH]c(n2)c3ccc(cc3)c4ccc(cc4)CNCCCN5CCCC5=O                    | 6.19935 |
| 537903 | c1ccc(cc1)C2CC2NC(=O)Nc3ccc(cc3)c4cccc(c4)c5[nH]c6cccccc6n5              | 6.20041 |
| 531387 | Cc1cccc2c1[nH]c(n2)c3cccc(c3)c4ccc(cc4)NC(=O)c5c(nns5)C                  | 6.20063 |
| 541898 | CNCCNCc1ccc(cc1)c2cccc(c2)c3[nH]c4ccc(cc4n3)C(F)(F)F                     | 6.20172 |
| 525147 | COc1cccc(c1)CN2CCC(CC2)C(=O)Nc3ccc(cc3)c4[nH]c5ccccc5n4                  | 6.2028  |
| 537143 | Cc1cccc2c1[nH]c(n2)c3cccc(c3)c4ccc(cc4)NC(=O)Cc5cccn(=O)c5               | 6.20302 |
| 526156 | CCOC(=O)NCC(=O)Nc1cccc(c1)c2cccc(c2)c3[nH]c4ccc(cc4n3)C(F)(F)F           | 6.20328 |
| 538286 | CC(C)CNCc1ccc(cc1)c2cccc(c2)c3[nH]c4cccc4n3                              | 6.2036  |
| 540763 | CCC(C)NC(=O)Nc1ccc(cc1)c2cccc(c2)c3[nH]c4ccc(cc4n3)C(F)(F)F              | 6.20514 |
| 527798 | CC(=O)Nc1ncc(s1)C(=O)Nc2cccc(c2)c3ccc(cc3)c4[nH]c5ccc(cc5n4)F            | 6.20622 |
| 542077 | Cc1cccc2c1[nH]c(n2)c3cccc(c3)c4cccc(c4)NC(=O)c5ccc(cc5)N(C)C(=O)C        | 6.20738 |
| 536981 | c1ccc2c(c1)[nH]c(n2)c3cccc(c3)c4ccc(cc4)CNCCc5ccccc5                     | 6.20857 |
| 539985 | Cc1cccc2c1[nH]c(n2)c3cccc(c3)c4cccc(c4)NC(=O)c5cccc(c5)N(C)C(=O)C        | 6.20944 |
| 542779 | c1cc(ccc1CN2CCN(CC2)c3cnccn3)c4ccc(s4)c5[nH]c6ccc(cc6n5)F                | 6.2098  |
| 533358 | COc1ccc2c(c1)[nH]c(n2)c3ccc(cc3n2)c4ccc(cc4)NC(=O)CN5CCOCC5              | 6.21011 |
| 541998 | c1ccc2c(c1)[nH]c(n2)c3ccc(cc3)c4ccc(cc4)CN5CCN(CC5)CCO                   | 6.21061 |
| 535452 | c1ccc2c(c1)[nH]c(n2)c3cccc(c3)c4cccc(c4)CNCc5ccccc5                      | 6.21113 |
| 530539 | Cc1ccoc1C(=O)Nc2cccc(c2)c3cccc(c3)c4[nH]c5ccc(cc5n4)C(F)(F)F             | 6.21233 |
| 534429 | c1cc2c(cc1c3[nH]c4ccc(cc4n3)NC(=O)C5CCCCC5)sc(n2)NC(=O)C6CCCCC6          | 6.2129  |
| 537719 | c1cc(cc(c1)NC(=O)c2ccncc2)c3ccc(cc3)c4[nH]c5ccc(cc5n4)F                  | 6.21325 |
| 535312 | CCCN1CCN(CC1)Cc2ccc(cc2)c3ccc(s3)c4[nH]c5ccccc5n4                        | 6.21376 |
| 537737 | c1cncc(c1)CC(=O)Nc2cccc(c2)c3cccc(c3)c4[nH]c5ccc(cc5n4)C(F)(F)F          | 6.21447 |



|        |                                                                          |         |
|--------|--------------------------------------------------------------------------|---------|
| 542459 | c1cc(ccc1)c2ccc(cc2)c3[nH]c4ccc(cc4n3)C(F)(F)F)CN5CCC(CC5)C(=O)N         | 6.21464 |
| 525608 | CCc1ccc(o1)CN2CCC(CC2)C(=O)Nc3ccc(cc3)c4[nH]c5ccccc5n4                   | 6.21489 |
| 539293 | c1cc(ccc1)c2[nH]c3ccc(cc3n2)F)c4ccc(cc4)CN5CCN(CC5)CCO                   | 6.2161  |
| 530872 | c1cc(ccc1)NC(=O)c2cccnc2)c3ccc(s3)c4[nH]c5ccc(cc5n4)F                    | 6.21613 |
| 530042 | CC(CN1CCN(CC1)C)C(=O)Nc2cccc(c2)c3ccc(cc3)c4[nH]c5ccc(cc5n4)C(F)(F)F     | 6.21667 |
| 527890 | CN(CCN)Cc1ccc(cc1)c2ccc(s2)c3[nH]c4ccc(cc4n3)C(F)(F)F                    | 6.21668 |
| 536758 | Cc1cccc2c1[nH]c(n2)c3ccc(s3)c4cccc(c4)CNc5ccc(cc5)CN                     | 6.21735 |
| 528804 | CNCCNCc1ccc(cc1)c2ccc(s2)c3[nH]c4ccc(cc4n3)C(F)(F)F                      | 6.21862 |
| 535756 | c1ccc2c(c1)[nH]c(n2)c3ccc(s3)c4cccc(c4)CNc5ccc(cc5)N                     | 6.21913 |
| 531117 | c1cc(ccc1)CNCCCN2CCCC2=O)c3ccc(cc3)c4[nH]c5ccc(cc5n4)F                   | 6.21986 |
| 538476 | c1cc(ccc1)CN2CCCC2)c3ccc(s3)c4[nH]c5ccc(cc5n4)F                          | 6.22022 |
| 533607 | Cc1cccc2c1[nH]c(n2)c3cccc(c3)c4cccc(c4)CNCC5CCCO5                        | 6.22058 |
| 535046 | Cc1c(cccn1)C(=O)Nc2cccc(c2)c3cccc(c3)c4[nH]c5ccc(cc5n4)C(F)(F)F          | 6.22076 |
| 538736 | Cc1cccc2c1[nH]c(n2)c3ccc(cc3)c4ccc(cc4)CN5CCN(CC5)CCO                    | 6.22279 |
| 526079 | Cn1cc(nc1)CCNC(=O)c2cccc(c2)c3ccc(s3)c4[nH]c5ccccc5n4                    | 6.22289 |
| 532367 | c1cc(ccc1)c2ccc(cc2)c3[nH]c4ccc(cc4n3)F)CN5CCN(CC5)CCC#N                 | 6.2229  |
| 526248 | c1cc(ccc1)CNCC2CCCCO2)c3ccc(s3)c4[nH]c5ccc(cc5n4)F                       | 6.22292 |
| 539149 | c1cc(ccc1)c2cccc(c2)c3[nH]c4ccc(cc4n3)F)CNCCCN5CCCC5=O                   | 6.22317 |
| 533523 | c1ccc2c(c1)[nH]c(n2)c3cccc(c3)c4ccc(cc4)NC(=O)c5cnn6c5nccc6              | 6.22395 |
| 534870 | Cc1cccc2c1[nH]c(n2)c3cccc(c3)c4ccc(cc4)NC(=O)Cc5c(nc(s5)C)C              | 6.22462 |
| 536492 | c1cc(ccc1)c2ccc(cc2)c3[nH]c4ccc(cc4n3)F)CN5CCC(C5)N                      | 6.22491 |
| 541597 | CC(=O)N(C)C1CCN(C1)Cc2ccc(cc2)c3cccc(c3)c4[nH]c5ccc(cc5n4)F              | 6.22499 |
| 542806 | c1ccc2c(c1)[nH]c(n2)c3ccc(cc3)NC(=O)c4ccc(s4)Cl                          | 6.22561 |
| 535424 | C1cccc2c1[nH]c(n2)c3cccc(c3)c4ccc(cc4)NC(=O)c5cccnc5                     | 6.22617 |
| 536500 | Cc1cccc2c1[nH]c(n2)c3ccc(s3)c4cccc(c4)NC(=O)Nc5ccc(cc5)Cl)Cl             | 6.22626 |
| 541370 | CC(=O)Nc1cccc(c1)C(=O)Nc2cccc(c2)c3ccc(cc3)c4[nH]c5ccccc5n4              | 6.22649 |
| 530703 | Cc1cccc2c1[nH]c(n2)c3ccc(s3)c4ccc(cc4)NC(=O)c5c(nns5)C                   | 6.22653 |
| 525745 | c1ccc2c(c1)[nH]c(n2)c3cccc(c3)c4ccc(cc4)CNc5cccc(c5)C(=O)N               | 6.22744 |
| 527945 | c1ccc(cc1)CCN2CCN(CC2)C(=O)c3ccc(cc3)c4ccc(s4)c5[nH]c6ccc(cc6n5)C(F)(F)F | 6.22798 |
| 527876 | CC(=O)Nc1ccc(cc1)C(=O)Nc2ccc(cc2)c3ccc(s3)c4[nH]c5ccccc5n4               | 6.22845 |
| 539586 | CCOc1ccc(cc1N(=O)=O)C(=O)Nc2ccc(cc2)c3[nH]c4cccc4n3                      | 6.22872 |
| 536126 | CS(=O)(=O)c1ccc(cc1)CNc2cccc(c2)c3cccc(c3)c4[nH]c5ccccc5n4               | 6.22916 |
| 534649 | Cc1cccc2c1[nH]c(n2)c3ccc(s3)c4cccc(c4)CNCCCN5CCCC5=O                     | 6.22939 |
| 528584 | CC(=O)Nc1ncc(s1)C(=O)Nc2cccc(c2)c3ccc(cc3)c4[nH]c5ccc(cc5n4)C(F)(F)F     | 6.22947 |
| 539251 | Cc1cccc2c1[nH]c(n2)c3ccc(cc3)c4ccc(cc4)CN5CCCCC5                         | 6.22998 |
| 540182 | c1cc(ccc1)c2ccc(s2)c3[nH]c4ccc(cc4n3)C(F)(F)F)CN5CCC(CC5)CO              | 6.2305  |
| 531315 | CN(CCC1CCCC1)Cc2ccc(cc2)c3ccc(s3)c4[nH]c5ccccc5n4                        | 6.23081 |
| 535458 | COC(=O)c1cccc(c1)CNc2ccc(cc2)c3ccc(s3)c4[nH]c5ccc(cc5n4)F                | 6.23084 |
| 533414 | Cc1cccc2c1[nH]c(n2)c3cccc(c3)c4cccc(c4)C(=O)NCCc5cn(cc5)C                | 6.23095 |
| 535880 | c1ccc2c(c1)[nH]c(n2)c3ccc(s3)c4cccc(c4)CN5CCCC(C5)N                      | 6.23289 |
| 541396 | c1ccc2c(c1)[nH]c(n2)c3cccc(c3)c4ccc(cc4)CN5CCCCC5                        | 6.2331  |
| 536019 | Cc1cccc2c1[nH]c(n2)c3cccc(c3)c4ccc(cc4)NC(=O)C5CCC(CC5)OC                | 6.23316 |
| 532079 | c1cc(ccc1)CNCCCN2CCCC2=O)c3ccc(cc3)c4[nH]c5ccc(cc5n4)C(F)(F)F            | 6.23458 |
| 531163 | Cc1cccc2c1[nH]c(n2)c3cccc(c3)c4cccc(c4)NC(=O)Cn5cc(c(=O)[nH]c5=O)C       | 6.23615 |
| 525906 | Cc1cccc2c1[nH]c(n2)c3ccc(s3)c4cccc(c4)NC(=O)Nc5ccccc5OC                  | 6.237   |
| 535511 | Cc1cccc2c1[nH]c(n2)c3cccc(c3)c4cccc(c4)NC(=O)c5cnc(cc5)C                 | 6.23753 |
| 527589 | CN1CCC(CC1)C(=O)Nc2ccc(cc2)c3cccc(c3)c4[nH]c5ccc(cc5n4)C(F)(F)F          | 6.23879 |
| 537722 | c1ccc2c(c1)[nH]c(n2)c3ccc(s3)c4ccc(cc4)CNc5ccccc5)N                      | 6.24131 |
| 526491 | c1cc(ccc1)NC(=O)c2cccnc2)c3ccc(cc3)c4[nH]c5ccc(cc5n4)C(F)(F)F            | 6.24289 |
| 528866 | c1ccc(cc1)CNc2cccc(c2)c3cccc(c3)c4[nH]c5ccccc5n4                         | 6.24486 |
| 543080 | CN1CCN(CC1)CC(=O)Nc2ccc(cc2)c3ccc(s3)c4[nH]c5ccc(cc5n4)C(F)(F)F          | 6.24491 |
| 526833 | CN(C)CCNCc1ccc(cc1)c2ccc(s2)c3[nH]c4cccc4n3                              | 6.24498 |
| 524973 | Cc1c(c(on1)C)c2cccc(c2)CNc3ccc(cc3)c4cccc(c4)c5[nH]c6ccccc6n5            | 6.24499 |
| 525434 | c1cc(ccc1)CN2CCN(CC2)CCO)c3ccc(cc3)c4[nH]c5ccc(cc5n4)F                   | 6.24675 |
| 537512 | c1cc(ccc1)c2ccc(cc2)c3[nH]c4ccc(cc4n3)F)CN5CCCC(C5)N                     | 6.2468  |
| 526084 | CC(CN1CCN(CC1)C)C(=O)Nc2ccc(cc2)c3cccc(c3)c4[nH]c5ccccc5n4               | 6.24693 |
| 527785 | Cc1cccc2c1[nH]c(n2)c3cccc(c3)c4ccc(cc4)NC(=O)Nc5ccc(cc5)Cl)Cl            | 6.2473  |
| 533317 | Cc1cccc2c1[nH]c(n2)c3ccc(cc3)c4ccc(cc4)CNc5cccc(c5)N                     | 6.24761 |
| 536172 | CC1CN(CC(O1)C)Cc2ccc(cc2)c3ccc(cc3)c4[nH]c5ccc(cc5n4)F                   | 6.24885 |
| 536566 | CC(=O)N(C)C1CCN(C1)Cc2cccc(c2)c3ccc(cc3)c4[nH]c5ccc(cc5n4)C(F)(F)F       | 6.24951 |
| 528158 | Cc1cccc2c1[nH]c(n2)c3cccc(c3)c4ccc(cc4)NC(=O)CN5CCN(CC5)C                | 6.25016 |

|        |                                                                         |         |
|--------|-------------------------------------------------------------------------|---------|
| 533293 | Cn1cncc1C(=O)Nc2ccc(cc2)c3ccc(cc3)c4[nH]c5ccc(cc5n4)C(F)(F)F            | 6.25191 |
| 526042 | c1cc(ccc1c2ccc(s2)c3[nH]c4ccc(cc4n3)C(F)(F)F)C(=O)N5CCCC5CN6CCC(C6)O    | 6.25195 |
| 542299 | Cn1c(ccn1)C(=O)NCCNCc2ccc(cc2)c3ccc(s3)c4[nH]c5ccccc5n4                 | 6.25222 |
| 533872 | CC(=O)Nc1cccc(c1)NC(=O)CS2ccc(cc2)c3[nH]c4ccccc4n3                      | 6.25259 |
| 534090 | CS(=O)(=O)c1ccc(cc1)CNCc2cccc(c2)c3cccc(c3)c4[nH]c5ccc(cc5n4)F          | 6.25277 |
| 541218 | c1cc(cc(c1)c2ccc(cc2)c3[nH]c4ccc(cc4n3)C(F)(F)F)CN5CCN(CC5)CCO          | 6.25283 |
| 530543 | CC(C)C(=O)Nc1ccc(cc1)c2cc(c(nc2)N)c3[nH]c4ccc(cc4n3)OC                  | 6.25387 |
| 529857 | c1cc(ccc1)NC(=O)CCc2c[nH]cn2)c3ccc(s3)c4[nH]c5ccc(cc5n4)F               | 6.25437 |
| 530720 | Cc1c(c(on1)C)c2cccc(c2)CNCc3ccc(cc3)c4ccc(s4)c5[nH]c6ccccc6n5           | 6.25466 |
| 538658 | Cc1c(c(on1)C)c2cccc(c2)CNCc3ccc(cc3)c4ccc(c4)c5[nH]c6ccc(cc6n5)C(F)(F)F | 6.2551  |
| 540847 | Cc1cccc2c1[nH]c(n2)c3cccc(c3)c4cccc(c4)NC(=O)CCc5c[nH]cn5               | 6.25753 |
| 538039 | CC(=O)Nc1nc(cs1)C(=O)Nc2ccc(cc2)c3cccc(c3)c4[nH]c5ccccc5n4              | 6.25796 |
| 532870 | c1ccc(cc1)n2ncc(n2)CNCc3cccc(c3)c4cccc(c4)c5[nH]c6ccc(cc6n5)C(F)(F)F    | 6.25817 |
| 528895 | c1ccc2c(c1)[nH]c(n2)c3cc(cs3)c4ccc(cc4)NC(=O)Nc5ccsc5                   | 6.25842 |
| 530644 | Cc1cccc2c1[nH]c(n2)c3ccc(s3)c4cccc(c4)CNCc5cnn(n5)c6ccccc6              | 6.25888 |
| 540734 | CCNCc1ccc(cc1)c2cccc(c2)c3[nH]c4ccccc4n3                                | 6.25985 |
| 528356 | CC(=O)Nc1cccc(c1)C(=O)Nc2cccc(c2)c3cccc(c3)c4[nH]c5ccc(cc5n4)F          | 6.26008 |
| 531912 | c1ccc2c(c1)[nH]c(n2)c3cccc(c3)c4cccc(c4)NC(=O)c5ccc(cc5)C(=O)N          | 6.26147 |
| 539847 | COC1CCC(CC1)C(=O)Nc2ccc(cc2)c3cccc(c3)c4[nH]c5ccc(cc5n4)C(F)(F)F        | 6.26167 |
| 525804 | Cc1c(c(on1)C)c2cccc(c2)CNCc3ccc(cc3)c4ccc(c4)c5[nH]c6ccc(cc6n5)F        | 6.2636  |
| 530365 | CC(C)(C)c1ccc(cc1)CNC(=O)C=Cc2ccc(cc2)c3[nH]c4ccc(cc4n3)C(C)(C)C        | 6.26378 |
| 536188 | Cc1cccc2c1[nH]c(n2)c3ccc(cc3)c4cccc(c4)NC(=O)Nc5cccc(c5)C#N             | 6.2642  |
| 532470 | COc1cccc1NC(=O)Nc2ccc(cc2)c3ccc(cc3)c4[nH]c5ccc(cc5n4)C(F)(F)F          | 6.26449 |
| 530234 | Cc1cccc2c1[nH]c(n2)c3cccc(c3)c4cccc(c4)CNCc5cccc(c5)N                   | 6.26552 |
| 538107 | Cc1cccc2c1[nH]c(n2)c3ccc(s3)c4cccc(c4)NC(=O)Nc5ccsc5                    | 6.26561 |
| 535792 | c1cc(cc(c1)c2[nH]c3ccc(cc3n2)F)c4ccc(cc4)CNCc5CCCO5                     | 6.26656 |
| 536826 | c1ccc2c(c1)[nH]c(n2)c3ccc(cc3)NC(=O)c4cccc(c4)C#N                       | 6.26708 |
| 542173 | c1cc(ccc1CN2CCC(CC2)C(=O)N)c3ccc(s3)c4[nH]c5ccc(cc5n4)C(F)(F)F          | 6.26743 |
| 527673 | CC(C1CCCN1C(=O)c2ccc(cc2)c3cccc(c3)c4[nH]c5ccc(cc5n4)F)O                | 6.26768 |
| 539529 | c1ccc(cc1)n2ncc(n2)CNCc3ccc(cc3)c4ccc(cc4)c5[nH]c6ccc(cc6n5)F           | 6.26786 |
| 531855 | Cc1cccc2c1[nH]c(n2)c3ccc(s3)c4cccc(c4)CN5CCCC(C5)N                      | 6.2681  |
| 536022 | Cc1cccc2c1[nH]c(n2)c3cccc(c3)c4cccc(c4)NC(=O)C(C)CN5CCN(CC5)C           | 6.26981 |
| 525692 | CC(C1CCCN1C(=O)c2cccc(c2)c3cccc(c3)c4[nH]c5ccc(cc5n4)F)O                | 6.2709  |
| 525840 | CC(C1CCCN1C(=O)c2cccc(c2)c3cccc(c3)c4[nH]c5ccccc5n4)O                   | 6.27284 |
| 531192 | Cc1cccc2c1[nH]c(n2)c3cccc(c3)c4cccc(c4)NC(=O)CN5CCN(CC5)C               | 6.27328 |
| 536374 | Cc1cccc2c1[nH]c(n2)c3cccc(c3)c4cccc(c4)NC(=O)c5ccc(cc5)CC(=O)NC         | 6.27543 |
| 530347 | c1ccc2c(c1)[nH]c(n2)c3ccc(cc3)c4cccc(c4)NC(=O)c5ccncc5                  | 6.27637 |
| 528361 | Cc1cccc2c1[nH]c(n2)c3cccc(c3)c4cccc(c4)C(=O)NCc5nccn5C                  | 6.27747 |
| 539649 | Cc1cccc2c1[nH]c(n2)c3ccc(cc3)c4ccc(cc4)CN5CC(OC(C5)C)C                  | 6.28181 |
| 528519 | CC1CN(CC(O1)C)Cc2ccc(cc2)c3ccc(cc3)c4[nH]c5ccccc5n4                     | 6.28183 |
| 539155 | CC(CN1CCN(CC1)C)C(=O)Nc2ccc(cc2)c3cccc(c3)c4[nH]c5ccc(cc5n4)F           | 6.28213 |
| 532057 | Cc1cccc2c1[nH]c(n2)c3ccc(s3)c4ccc(cc4)CN5CCCC5                          | 6.28287 |
| 532970 | Cc1cccc2c1[nH]c(n2)c3cccc(c3)c4cccc(c4)NC(=O)NCc5ccccc5                 | 6.28316 |
| 532429 | c1cc(cc(c1)NC(=O)c2cccc(c2)C(=O)N)c3ccc(cc3)c4[nH]c5ccc(cc5n4)C(F)(F)F  | 6.28389 |
| 529672 | CN1CCN(CC1)CC(=O)Nc2cccc(c2)c3ccc(cc3)c4[nH]c5ccc(cc5n4)C(F)(F)F        | 6.28412 |
| 531322 | Cc1cccc2c1[nH]c(n2)c3ccc(cc3)c4ccc(cc4)C(=O)NCCN5CCCC5                  | 6.28446 |
| 539139 | c1cc(cc(c1)c2ccc(cc2)c3[nH]c4ccc(cc4n3)C(F)(F)F)CN5CCCC(C5)N            | 6.28551 |
| 533363 | Cc1cccc2c1[nH]c(n2)c3ccc(s3)c4cccc(c4)CNCc5cccc(c5)N                    | 6.28652 |
| 525515 | Cc1cccc2c1[nH]c(n2)c3ccc(s3)c4cccc(c4)NC(=O)Nc5ccc(cc5)Cl               | 6.28673 |
| 528059 | CS(=O)(=O)NCCNCNc1ccc(cc1)c2ccc(s2)c3[nH]c4ccc(cc4n3)C(F)(F)F           | 6.2884  |
| 540069 | c1cc(cc(c1)c2[nH]c3ccc(cc3n2)F)c4cccc(c4)NC(=O)c5ccncc5                 | 6.28891 |
| 538248 | c1cc(cc(c1)NC(=O)c2ccc(cc2)C(=O)N)c3ccc(cc3)c4[nH]c5ccc(cc5n4)C(F)(F)F  | 6.28894 |
| 536010 | c1cc(cc(c1)c2cccc(c2)c3[nH]c4ccc(cc4n3)F)CNCc5CCCO5                     | 6.2896  |
| 530689 | CS(=O)(=O)c1ccc(cc1)CNCc2cccc(c2)c3ccc(cc3)c4[nH]c5ccc(cc5n4)C(F)(F)F   | 6.29007 |
| 535942 | c1cc(ccc1c2[nH]c3ccc(cc3n2)Cc4ccc5c(c4)nc([nH]5)c6ccc(cc6)N)N           | 6.29078 |
| 537318 | c1cc(cc(c1)c2cccc(c2)c3[nH]c4ccc(cc4n3)C(F)(F)F)CNCc5cccc(c5)N          | 6.29248 |
| 539827 | Cn1cncc1C(=O)Nc2cccc(c2)c3ccc(cc3)c4[nH]c5ccc(cc5n4)C(F)(F)F            | 6.29301 |
| 534174 | COc1ccc(cc1)NC(=O)Nc2ccc(cc2)c3ccc(cc3)c4[nH]c5ccccc5n4                 | 6.29306 |
| 542684 | CN(CCN)Cc1cccc(c1)c2cccc(c2)c3[nH]c4ccc(cc4n3)C(F)(F)F                  | 6.29365 |
| 534613 | Cc1cccc2c1[nH]c(n2)c3ccc(cc3)c4ccc(cc4)CNCc5ccccc5                      | 6.29411 |
| 528363 | c1cc(cc(c1)c2cccc(c2)c3[nH]c4ccc(cc4n3)C(F)(F)F)CN5CCC(CC5)CO           | 6.29581 |

|        |                                                                             |         |
|--------|-----------------------------------------------------------------------------|---------|
| 541446 | COc1cc(cc(c1)OC)C(=O)Nc2ccc(cc2)c3[nH]c4cccc4n3                             | 6.29595 |
| 526343 | Cc1cccc2c1[nH]c(n2)c3cccc(c3)c4cccc(c4)NC(=O)c5cn(c(=O)n5C)C                | 6.29706 |
| 534690 | COC(=O)c1cccc(c1)CNCc2cccc(c2)c3cccc(c3)c4[nH]c5cccc5n4                     | 6.29777 |
| 541330 | CCNC(=O)Nc1ccc(cc1)c2cc(c(nc2)N)c3[nH]c4cc(ccc4n3)OC                        | 6.30156 |
| 529891 | Cc1cccc2c1[nH]c(n2)c3cccc(c3)c4ccc(cc4)NC(=O)c5ccncc5                       | 6.3038  |
| 527259 | Cn1cncc1C(=O)Nc2cccc(c2)c3cccc(c3)c4[nH]c5ccc(cc5n4)F                       | 6.30749 |
| 525088 | COC(=O)c1cccc(c1)CNCc2cccc(c2)c3ccc(s3)c4[nH]c5cccc5n4                      | 6.30925 |
| 528372 | c1ccc2c(c1)[nH]c(n2)c3cccc(c3)c4cccc(c4)CNCc5ccc(cc5)CN                     | 6.31086 |
| 533229 | c1cc(cc(c1)c2[nH]c3ccc(cc3n2)C(F)(F)F)c4ccc(cc4)CN5CCC(CC5)CO               | 6.31606 |
| 526396 | Cc1cccc2c1[nH]c(n2)c3ccc(cc3)c4ccc(cc4)CNCNC(=O)c5ccnn5C                    | 6.31881 |
| 527508 | c1ccc2c(c1)[nH]c(n2)c3cccc(c3)c4cccc(c4)NC(=O)c5ccncc5                      | 6.31939 |
| 528012 | c1cc(ccc1CN2CCC(CC2)CO)c3ccc(s3)c4[nH]c5ccc(cc5n4)C(F)(F)F                  | 6.32184 |
| 536088 | CN(C)CCNCc1ccc(cc1)c2ccc(cc2)c3[nH]c4ccc(cc4n3)F                            | 6.324   |
| 531628 | Cn1c(ccn1)C(=O)NCCNCc2cccc(c2)c3ccc(cc3)c4[nH]c5cccc5n4                     | 6.32527 |
| 533174 | c1ccc2c(c1)C(=O)NC2=O)CC(=O)Nc3ccc(cc3)c4ccc(cc4)c5[nH]c6ccc(cc6n5)C(F)(F)F | 6.32802 |
| 535718 | Cc1cccc2c1[nH]c(n2)c3ccc(s3)c4cccc(c4)CN5CCCCC5                             | 6.32933 |
| 528424 | CS(=O)(=O)NCCNCc1cccc(c1)c2cccc(c2)c3[nH]c4ccc(cc4n3)C(F)(F)F               | 6.33066 |
| 537816 | c1cc(cc(c1)C(=O)N2CCCC2CN3CCC(C3)O)c4ccc(cc4)c5[nH]c6ccc(cc6n5)C(F)(F)F     | 6.33216 |
| 527421 | Cc1ccc(cc1NC(=O)C)C(=O)Nc2cccc(c2)c3cc(sc3)c4[nH]c5cccc5n4                  | 6.33297 |
| 535417 | Cc1cccc2c1[nH]c(n2)c3cccc(c3)c4cccc(c4)C(=O)N5CCCCC5CN6CCC(C6)O             | 6.33471 |
| 541857 | CC(=O)Nc1nc(cs1)C(=O)Nc2ccc(cc2)c3ccc(cc3)c4[nH]c5ccc(cc5n4)F               | 6.33714 |
| 535102 | c1cc(cc(c1)c2[nH]c3ccc(cc3n2)F)c4ccc(c4)NC(=O)c5c[nH]cn5                    | 6.33779 |
| 536777 | c1ccc2c(c1)[nH]c(n2)c3cccc(c3)c4ccc(cc4)NC(=O)Nc5ccc(c(c5)Cl)Cl             | 6.33813 |
| 533382 | CS(=O)(=O)NCCNCc1ccc(cc1)c2ccc(cc2)c3[nH]c4ccc(cc4n3)C(F)(F)F               | 6.34042 |
| 536350 | c1ccc(cc1)n2ncc(n2)CNCc3ccc(cc3)c4ccc(s4)c5[nH]c6ccc(cc6n5)C(F)(F)F         | 6.34078 |
| 536650 | Cc1c(c(on1)C)c2cccc(c2)CNCc3cccc(c3)c4cccc(c4)c5[nH]c6ccc(cc6n5)C(F)(F)F    | 6.34104 |
| 534585 | c1ccc(cc1)CNCc2cccc(c2)c3cc(sc3)c4[nH]c5cccc5n4                             | 6.34116 |
| 542074 | CC(=O)Nc1ncc(s1)C(=O)Nc2cccc(c2)c3cccc(c3)c4[nH]c5ccc(cc5n4)F               | 6.34294 |
| 540268 | Cc1cccc2c1[nH]c(n2)c3cccc(c3)c4cccc(c4)NC(=O)NCc5cccc(c5)F                  | 6.34413 |
| 525131 | c1ccc2c(c1)[nH]c(n2)c3cc(cs3)c4cccc(c4)CN5CCN(CC5)CCN6CCOCC6                | 6.34441 |
| 527864 | Cc1cccc2c1[nH]c(n2)c3cccc(c3)c4ccc(cc4)NC(=O)Cc5ccc(c(c5)O)OC               | 6.34452 |
| 529454 | COc1ccc(cc1)NC(=O)Nc2cccc(c2)c3ccc(cc3)c4[nH]c5ccc(cc5n4)C(F)(F)F           | 6.34503 |
| 529866 | c1cc(cc(c1)c2ccc(s2)c3[nH]c4ccc(cc4n3)C(F)(F)F)CNCCN5CCCC5=O                | 6.34868 |
| 527697 | Cn1cncc1C(=O)Nc2cccc(c2)c3cc(sc3)c4[nH]c5cccc5n4                            | 6.34928 |
| 538777 | Cc1cccc2c1[nH]c(n2)c3ccc(s3)c4ccc(cc4)CNCc5ccc(cc5)CN                       | 6.35504 |
| 542836 | c1cc(ccc1CNCC2CCCO2)c3ccc(cc3)c4[nH]c5ccc(cc5n4)F                           | 6.35608 |
| 542411 | CNC(=O)Cc1ccc(cc1)C(=O)Nc2cccc(c2)c3cccc(c3)c4[nH]c5ccc(cc5n4)C(F)(F)F      | 6.35669 |
| 536527 | c1cc(cc(c1)N)CNCc2ccc(cc2)c3ccc(s3)c4[nH]c5ccc(cc5n4)C(F)(F)F               | 6.35819 |
| 536383 | Cc1c(snn1)C(=O)Nc2cccc(c2)c3cccc(c3)c4[nH]c5cccc5n4                         | 6.35926 |
| 532309 | CC(C1CCCCN1C(=O)c2ccc(cc2)c3ccc(cc3)c4[nH]c5ccc(cc5n4)F)O                   | 6.36108 |
| 542955 | c1ccc(cc1)n2ncc(n2)CNCc3ccc(cc3)c4ccc(cc4)c5[nH]c6ccc(cc6n5)C(F)(F)F        | 6.36359 |
| 536578 | Cc1cccc2c1[nH]c(n2)c3ccc(cc3)c4ccc(cc4)CNCc5cnn(n5)c6cccc6                  | 6.3686  |
| 532213 | Cc1c(c(on1)C)c2cccc(c2)CNCc3ccc(cc3)c4ccc(s4)c5[nH]c6ccc(cc6n5)F            | 6.37345 |
| 537583 | c1ccc(cc1)CNCc2ccc(cc2)c3cccc(c3)c4[nH]c5cccc5n4                            | 6.3742  |
| 528373 | c1cc(cc(c1)c2cccc(c2)c3[nH]c4ccc(cc4n3)C(F)(F)F)CNCC5CCCO5                  | 6.37436 |
| 534008 | CC(=O)Nc1nc(cs1)C(=O)Nc2cccc(c2)c3ccc(cc3)c4[nH]c5cccc5n4                   | 6.37531 |
| 539687 | CN1CCN(CC1)CC(=O)Nc2ccc(cc2)c3ccc(cc3)c4[nH]c5ccc(cc5n4)C(F)(F)F            | 6.37627 |
| 527402 | c1ccc2c(c1)[nH]c(n2)c3ccc(cc3)c4cccc(c4)CNCc5cccc(c5)N                      | 6.38161 |
| 539928 | CC(CN1CCN(CC1)C)C(=O)Nc2ccc(cc2)c3ccc(cc3)c4[nH]c5ccc(cc5n4)C(F)(F)F        | 6.38199 |
| 540200 | CN1CCCC(C1)CN2CCN(CC2)Cc3cccc(c3)c4cc(sc4)c5[nH]c6cccc6n5                   | 6.38334 |
| 525770 | Cc1cccc2c1[nH]c(n2)c3cccc(c3)c4cccc(c4)NC(=O)C(C)CN(C)C                     | 6.38403 |
| 540987 | c1ccc2c(c1)[nH]c(n2)c3ccc(cc3)NC(=O)c4ccc(cc4)S(=O)(=O)N5CCCCC5             | 6.38609 |
| 540011 | Cc1cccc2c1[nH]c(n2)c3ccc(cc3)c4cccc(c4)NC(=O)CCc5c[nH]cn5                   | 6.38676 |
| 525094 | Cc1cccc2c1[nH]c(n2)c3cccc(c3)c4ccc(cc4)NC(=O)c5cccc(c5)C(=O)N               | 6.3877  |
| 536685 | Cc1cccc2c1[nH]c(n2)c3ccc(s3)c4ccc(cc4)NC(=O)C(C)CN(C)C                      | 6.38853 |
| 529535 | c1cc(ccc1CNCC2CCCO2)c3ccc(cc3)c4[nH]c5ccc(cc5n4)C(F)(F)F                    | 6.39027 |
| 527157 | CC(C)NCc1ccc(cc1)c2cccc(c2)c3[nH]c4ccc(cc4n3)F                              | 6.39208 |
| 532530 | Cc1cccc2c1[nH]c(n2)c3ccc(cc3)c4ccc(cc4)CNCC(C)C                             | 6.3924  |
| 536439 | c1cc(cc(c1)c2[nH]c3ccc(cc3n2)C(F)(F)F)c4cccc(c4)NC(=O)c5ccncc5              | 6.39365 |
| 534881 | CC(CN1CCN(CC1)C)C(=O)Nc2ccc(cc2)c3cccc(c3)c4[nH]c5ccc(cc5n4)C(F)(F)F        | 6.39432 |
| 542153 | c1ccc2c(c1)[nH]c(n2)c3cc(cs3)c4ccc(cc4)NC(=O)Nc5ccc(c(c5)Cl)Cl              | 6.39581 |

|        |                                                                        |         |
|--------|------------------------------------------------------------------------|---------|
| 535844 | Cc1cccc2c1[nH]c(n2)c3ccc(s3)c4ccc(cc4)CNCc5cccc(c5)C(=O)OC             | 6.39603 |
| 530985 | Cn1cc(nc1)CCNC(=O)c2ccc(cc2)c3ccc(s3)c4[nH]c5ccc(cc5n4)C(F)(F)F        | 6.39621 |
| 529418 | c1cc(ccc1CN)CNCc2ccc(cc2)c3ccc(cc3)c4[nH]c5ccc(cc5n4)F                 | 6.39629 |
| 526685 | Cc1cccc2c1[nH]c(n2)c3cccc(c3)c4cccc(c4)NC(=O)Nc5ccc(cc5)OC             | 6.39845 |
| 527631 | CN1CCN(CC1)CC(=O)Nc2ccc(cc2)c3cccc(c3)c4[nH]c5ccc(cc5n4)C(F)(F)F       | 6.39921 |
| 528902 | CC(=O)Nc1ncc(s1)C(=O)Nc2cccc(c2)c3ccc(s3)c4[nH]c5ccc(cc5n4)C(F)(F)F    | 6.40012 |
| 530714 | CN(C)CCN1CCN(CC1)Cc2cccc(c2)c3cc(sc3)c4[nH]c5cccc5n4                   | 6.40022 |
| 541389 | c1ccc2c(c1)[nH]c(n2)c3cccc(c3)c4ccc(cc4)CNCc5ccc(s5)c6ccccn6           | 6.4019  |
| 528174 | Cc1cccc2c1[nH]c(n2)c3ccc(cc3)c4cccc(c4)CNCCNC(=O)c5ccnn5C              | 6.40279 |
| 525543 | Cc1ncc(s1)CN2CCC(CC2)C(=O)Nc3ccc(cc3)c4nc5cccc5o4                      | 6.40509 |
| 531692 | Cc1cccc2c1[nH]c(n2)c3cccc(c3)c4cccc(c4)CNCc5cccc5                      | 6.40518 |
| 532816 | Cc1cccc2c1[nH]c(n2)c3ccc(cc3)c4cccc(c4)CNCc5cccc(c5)N                  | 6.40873 |
| 530495 | c1ccc2c(c1)[nH]c(n2)c3cccc(c3)c4cccc(c4)NC(=O)NCc5cccc(c5)F            | 6.4103  |
| 536987 | Cn1cc(n(c1=O)C)C(=O)Nc2cccc(c2)c3cccc(c3)c4[nH]c5ccc(cc5n4)F           | 6.41087 |
| 528142 | CNCCNCc1ccc(cc1)c2ccc(cc2)c3[nH]c4ccc(cc4n3)F                          | 6.41235 |
| 540232 | Cc1cccc2c1[nH]c(n2)c3ccc(s3)c4ccc(cc4)CN5CCCC(C5)N                     | 6.41767 |
| 542506 | c1cc(ccc1CNCCCN2CCCC=O)c3ccc(s3)c4[nH]c5ccc(cc5n4)C(F)(F)F             | 6.41993 |
| 537692 | c1cc(ccc1CN2CCN(CC2)CCO)c3ccc(s3)c4[nH]c5ccc(cc5n4)C(F)(F)F            | 6.4213  |
| 537794 | Cc1c(c(on1)C)c2cccc(c2)CNCc3cccc(c3)c4cccc(c4)c5[nH]c6cccc6n5          | 6.42333 |
| 538031 | c1ccc(c(c1)C(=O)N)OCC(=O)Nc2cccc(c2)c3cccc(c3)c4[nH]c5cccc5n4          | 6.42436 |
| 536676 | Cc1cccc2c1[nH]c(n2)c3cccc(c3)c4ccc(cc4)NC(=O)C(=O)c5cccn5C             | 6.42545 |
| 531870 | Cc1cccc2c1[nH]c(n2)c3cccc(c3)c4cccc(c4)NC(=O)Nc5ccc(c(c5)Cl)Cl         | 6.42609 |
| 532949 | Cc1cccc2c1[nH]c(n2)c3ccc(s3)c4ccc(cc4)CN5CCC(C5)N                      | 6.42776 |
| 543005 | CN1CCN(CC1)CC(=O)Nc2cccc(c2)c3cccc(c3)c4[nH]c5ccc(cc5n4)C(F)(F)F       | 6.43    |
| 525346 | Cc1cccc2c1[nH]c(n2)c3cccc(c3)c4ccc(cc4)C(=O)N5CCCCC5(C)O               | 6.43032 |
| 527888 | Cc1cccc2c1[nH]c(n2)c3cccc(c3)c4cccc(c4)CNCc5cccc(c5)c6c(noc6C)C        | 6.43225 |
| 534394 | c1cc(ccc1c2ccc(cc2)C(=O)N3CCCCC3CN4CCC(C4)O)c5[nH]c6ccc(cc6n5)F        | 6.43371 |
| 525074 | COc1ccc(cc1)CNCc2cccc(c2)c3cccc(c3)c4[nH]c5cccc5n4                     | 6.43381 |
| 534766 | c1cc(cc(c1)c2ccc(s2)c3[nH]c4ccc(cc4n3)C(F)(F)F)CNCC5CCCO5              | 6.43498 |
| 538715 | c1cc(cc(c1)NC(=O)c2cccnc2)c3ccc(s3)c4[nH]c5ccc(cc5n4)C(F)(F)F          | 6.44021 |
| 527145 | c1ccc2cc3c(cc2c1)[nH]c(n3)c4ccc(cc4)NC(=O)c5cccc(c5)Br                 | 6.44052 |
| 525835 | c1cc(cc(c1)c2ccc(cc2)c3[nH]c4ccc(cc4n3)C(F)(F)F)CNCc5cccc(c5)N         | 6.44325 |
| 537674 | c1ccc2c(c1)[nH]c(n2)c3cccc(c3)NC(=O)c4cccc(c4)NC(=O)c5ccc5             | 6.44344 |
| 537960 | CC(C)(C)OC(=O)C1CCCN(C1)Cc2ccc(cc2)c3cccc(c3)c4[nH]c5cccc5n4           | 6.44618 |
| 541470 | COc(=O)c1cccc(c1)CNCc2cccc(c2)c3ccc(cc3)c4[nH]c5cccc5n4                | 6.4506  |
| 537208 | CC(=O)Nc1ncc(s1)C(=O)Nc2ccc(cc2)c3cccc(c3)c4[nH]c5ccc(cc5n4)F          | 6.45104 |
| 541149 | Cc1cccc2c1[nH]c(n2)c3cccc(c3)c4cccc(c4)NC(=O)c5cnc(s5)NC(=O)C          | 6.45158 |
| 541145 | c1ccc2c(c1)[nH]c(n2)c3ccc(cc3)c4cccc(c4)NC(=O)c5ccc(cc5)C(=O)N         | 6.45475 |
| 538928 | Cc1c(snn1)C(=O)Nc2cccc(c2)c3cc(sc3)c4[nH]c5cccc5n4                     | 6.45509 |
| 539689 | c1cc(cc(c1)NC(=O)Nc2ccsc2)c3ccc(cc3)c4[nH]c5ccc(cc5n4)C(F)(F)F         | 6.45523 |
| 527180 | c1cc(cc(c1)c2[nH]c3ccc(cc3n2)C(F)(F)F)c4ccc(cc4)NC(=O)c5cccc(c5)C(=O)N | 6.45578 |
| 526059 | Cc1cccc2c1[nH]c(n2)c3ccc(cc3)c4ccc(cc4)CN5CCCC(C5)N                    | 6.45651 |
| 527169 | c1ccc2c(c1)[nH]c(n2)c3ccc(s3)c4cccc(c4)NC(=O)c5cccc(c5)C(=O)N          | 6.45726 |
| 538425 | c1cc(ccc1CN2CCCCC2)c3ccc(cc3)c4[nH]c5ccc(cc5n4)F                       | 6.45749 |
| 535760 | c1ccc2c(c1)[nH]c(n2)c3cccc(c3)c4ccc(cc4)NC(=O)CCc5c[nH]cn5             | 6.45856 |
| 540039 | Cc1cccc2c1[nH]c(n2)c3ccc(cc3)c4ccc(cc4)CNCc5ccc(cc5)OC                 | 6.4672  |
| 531119 | C=CCOC(=O)N1CCC(C1)CNCc2cccc(c2)c3cccc(c3)c4[nH]c5cccc5n4              | 6.46909 |
| 532657 | Cc1cccc2c1[nH]c(n2)c3ccc(cc3)c4ccc(cc4)NC(=O)Nc5ccc(c(c5F)F)F          | 6.47101 |
| 539429 | c1ccc(cc1)CNCc2ccc(cc2)c3ccc(cc3)c4[nH]c5cccc5n4                       | 6.47145 |
| 542679 | c1cc(cc(c1)NC(=O)c2ccncc2)c3ccc(cc3)c4[nH]c5ccc(cc5n4)C(F)(F)F         | 6.47276 |
| 525436 | c1ccc2c(c1)[nH]c(n2)c3ccc(s3)c4cccc(c4)CNCCc5ccncc5                    | 6.47388 |
| 533035 | Cc1cccc2c1[nH]c(n2)c3cccc(c3)c4cccc(c4)CNC(C)C                         | 6.47429 |
| 529417 | Cc1cccc2c1[nH]c(n2)c3ccc(s3)c4cccc(c4)CNCc5ccc(cc5)S(=O)(=O)C          | 6.47665 |
| 531965 | c1cc(cc(c1)c2[nH]c3ccc(cc3n2)F)c4cccc(c4)NC(=O)c5ccc5                  | 6.47785 |
| 536472 | c1cc(cc(c1)F)CNC(=O)Nc2cccc(c2)c3cccc(c3)c4[nH]c5ccc(cc5n4)C(F)(F)F    | 6.48087 |
| 541594 | c1ccc2c(c1)[nH]c(n2)c3ccc(cc3)c4ccc(cc4)NC(=O)Nc5ccc(c(c5F)F)F         | 6.48168 |
| 529611 | c1ccc(cc1)n2ncc(n2)CNCc3cccc(c3)c4ccc(s4)c5[nH]c6ccc(cc6n5)C(F)(F)F    | 6.48236 |
| 539372 | Cc1cccc2c1[nH]c(n2)c3cccc(c3)c4cccc(c4)NC(=O)c5ccc(c(c5)NC(=O)C)C      | 6.48339 |
| 541590 | CS(=O)(=O)c1ccc(cc1)CNCc2ccc(cc2)c3cccc(c3)c4[nH]c5cccc5n4             | 6.48672 |
| 528388 | Cc1cccc2c1[nH]c(n2)c3cccc(c3)c4cccc(c4)NC(=O)c5ccc(cc5)C(=O)N          | 6.49066 |
| 533662 | Cc1cccc2c1[nH]c(n2)c3ccc(cc3)c4cccc(c4)CNCc5cccc(c5)C(=O)OC            | 6.49261 |

|        |                                                                             |         |
|--------|-----------------------------------------------------------------------------|---------|
| 539890 | Cc1cccc2c1[nH]c(n2)c3ccc(cc3)c4ccc(cc4)CNCc5ccc(cc5)NC                      | 6.49558 |
| 525795 | c1ccc2c(c1)[nH]c(n2)c3ccc(cc3O)NC(=O)c4ccc(cc4)N(=O)=O                      | 6.49752 |
| 530951 | CS(=O)(=O)c1ccc(cc1)CNCc2ccc(cc2)c3cccc(c3)c4[nH]c5ccc(cc5n4)F              | 6.50137 |
| 541492 | CC(=O)N(C)c1ccc(cc1)C(=O)Nc2cccc(c2)c3cccc(c3)c4[nH]c5ccc(cc5n4)C(F)(F)F    | 6.50307 |
| 533720 | Cc1c(snn1)C(=O)Nc2cccc(c2)c3ccc(cc3)c4[nH]c5ccc(cc5n4)C(F)(F)F              | 6.50314 |
| 529716 | CNCCNCc1ccc(cc1)c2ccc(cc2)c3[nH]c4ccc(cc4n3)C(F)(F)F                        | 6.50374 |
| 542886 | Cc1cccc2c1[nH]c(n2)c3cccc(c3)c4ccc(cc4)NC(=O)C5CCN(CC5)C(=O)C               | 6.50473 |
| 539487 | COc1ccc(cc1)CNCc2cccc(c2)c3ccc(cc3)c4[nH]c5cccc5n4                          | 6.5074  |
| 537430 | COc1ccc(cc1)NC(=O)Nc2cccc(c2)c3cccc(c3)c4[nH]c5cccc5n4                      | 6.50989 |
| 531536 | CN1CCN(CC1)CC(=O)Nc2cccc(c2)c3ccc(s3)c4[nH]c5ccc(cc5n4)C(F)(F)F             | 6.51007 |
| 532848 | c1cc(cc(c1)c2cccc(c2)c3[nH]c4ccc(cc4n3)F)CNCc5ccc(cc5)CN                    | 6.51097 |
| 534480 | Cc1cccc2c1[nH]c(n2)c3ccc(s3)c4ccc(cc4)CNCCNC(=O)c5ccnn5C                    | 6.51207 |
| 527146 | c1cc(cc(c1)c2[nH]c3ccc(cc3n2)F)c4ccc(cc4)CN5CCN(CC5)CCN6CCOCC6              | 6.51248 |
| 538178 | Cc1cccc2c1[nH]c(n2)c3cccc(c3)c4ccc(cc4)CNCc5cccc(c5)C(=O)OC                 | 6.51435 |
| 537409 | COc1cccc1NC(=O)Nc2cccc(c2)c3ccc(cc3)c4[nH]c5ccc(cc5n4)C(F)(F)F              | 6.51468 |
| 525951 | Cc1cccc2c1[nH]c(n2)c3cccc(c3)c4cccc(c4)NC(=O)c5csnn5                        | 6.51646 |
| 529400 | Cn1c(ccn1)C(=O)NCCNCc2cccc(c2)c3ccc(s3)c4[nH]c5cccc5n4                      | 6.51909 |
| 538297 | Cc1cccc2c1[nH]c(n2)c3cccc(c3)c4ccc(cc4)NC(=O)CCc5c[nH]cn5                   | 6.52026 |
| 539879 | c1cc(cnc1)c2cc(c3cc(ccc3n2)Cl)C(=O)Nc4ccc(cc4)S(=O)(=O)N5CCCC5              | 6.52286 |
| 534517 | COc1ccc(cc1)CNCc2cccc(c2)c3cccc(c3)c4[nH]c5ccc(cc5n4)F                      | 6.52305 |
| 530508 | CNc1ccc(cc1)CNCc2cccc(c2)c3ccc(cc3)c4[nH]c5cccc5n4                          | 6.52325 |
| 526600 | c1cc(cc(c1)c2ccc(cc2)c3[nH]c4ccc(cc4n3)C(F)(F)F)CNCCN5CCCC5=O               | 6.52331 |
| 538930 | Cc1cccc2c1[nH]c(n2)c3cccc(c3)c4cccc(c4)CNCc5ccc(cc5)S(=O)(=O)C              | 6.5239  |
| 535383 | CN1CCN(CC1)CC(=O)Nc2ccc(cc2)c3ccc(s3)c4[nH]c5cccc5n4                        | 6.52441 |
| 541287 | c1cc(cc(c1)c2cccc(c2)c3[nH]c4ccc(cc4n3)C(F)(F)F)CNCCN5CCCC5=O               | 6.52471 |
| 531456 | COC(=O)c1cccc(c1)CNCc2ccc(cc2)c3ccc(cc3)c4[nH]c5ccc(cc5n4)C(F)(F)F          | 6.52577 |
| 542042 | Cn1c(ccn1)C(=O)NCCNCc2ccc(cc2)c3ccc(cc3)c4[nH]c5ccc(cc5n4)F                 | 6.52685 |
| 543037 | c1cc(cc(c1)c2[nH]c3ccc(cc3n2)F)c4ccc(cc4)NC(=O)Nc5ccc(cc5)Cl                | 6.53413 |
| 526666 | CC(=O)Nc1nc(cs1)C(=O)Nc2ccc(cc2)c3cccc(c3)c4[nH]c5ccc(cc5n4)F               | 6.53536 |
| 541463 | Cc1cccc2c1[nH]c(n2)c3cccc(c3)c4ccc(cc4)NC(=O)CC5c6cccc6C(=O)N5              | 6.5391  |
| 538370 | COC(=O)c1cccc(c1)CNCc2ccc(cc2)c3ccc(s3)c4[nH]c5cccc5n4                      | 6.53917 |
| 532172 | CC(=O)Nc1nc(cs1)C(=O)Nc2cccc(c2)c3ccc(cc3)c4[nH]c5ccc(cc5n4)F               | 6.54097 |
| 542340 | CC(C)NCc1cccc(c1)c2cccc(c2)c3[nH]c4ccc(cc4n3)F                              | 6.54519 |
| 529167 | c1ccc(cc1)CNCc2ccc(cc2)c3ccc(cc3)c4[nH]c5ccc(cc5n4)F                        | 6.54688 |
| 524998 | Cc1cccc2c1[nH]c(n2)c3ccc(cc3)c4ccc(cc4)CNCc5cccc(c5)C(=O)OC                 | 6.54839 |
| 527738 | c1ccc(cc1)CNCc2cccc(c2)c3cccc(c3)c4[nH]c5ccc(cc5n4)F                        | 6.54884 |
| 536301 | Cc1cccc2c1[nH]c(n2)c3cccc(c3)c4cccc(c4)NC(=O)CNC5ccc(cc5)C(=O)N             | 6.54923 |
| 528641 | CC(C)(C)C(=O)Nc1ccc(cc1)C(=O)Nc2cccc(c2)c3[nH]c4cccc4n3                     | 6.55016 |
| 529642 | CCOC(=O)c1ccc(cc1)c2cc(c(nc2)N)c3[nH]c4c(cccc4n3)C                          | 6.55095 |
| 536449 | CC(C1CCCN1C(=O)c2cccc(c2)c3cccc(c3)c4[nH]c5ccc(cc5n4)C(F)(F)F)O             | 6.55273 |
| 540058 | c1ccc2c(c1)[nH]c(n2)c3ccc(s3)c4ccc(cc4)CN5CCN(CC5)CCN6CCOCC6                | 6.55284 |
| 540169 | c1cc(cc(c1)c2[nH]c3ccc(cc3n2)C(F)(F)F)c4cccc(c4)C(=O)N5CCCC5CN6CCC(C6)O     | 6.55422 |
| 542318 | c1ccc2c(c1)[nH]c(n2)c3ccc(s3)c4ccc(cc4)NC(=O)Nc5ccsc5                       | 6.55495 |
| 532680 | c1cc(cc(c1)NC(=O)c2ccncc2)c3ccc(cc3)c4[nH]c5ccc(cc5n4)F                     | 6.55555 |
| 534929 | c1cc(cc(c1)NC(=O)c2csnn2)c3ccc(cc3)c4[nH]c5ccc(cc5n4)F                      | 6.55573 |
| 532524 | c1cc(cc(c1)c2[nH]c3ccc(cc3n2)C(F)(F)F)c4ccc(cc4)CNCC5CCCO5                  | 6.55721 |
| 529907 | c1cc(cc(c1)c2[nH]c3ccc(cc3n2)C(F)(F)F)c4cccc(c4)NC(=O)c5ccoc5               | 6.55801 |
| 530868 | Cc1cnc(cn1)C(=O)Nc2cccc(c2)c3cc(sc3)c4[nH]c5cccc5n4                         | 6.56079 |
| 532300 | c1cc(cc(c1)NC(=O)Nc2ccc(cc2)c3cccc(c3)c4[nH]c5ccc(cc5n4)F)C#N               | 6.56085 |
| 533448 | CC(CN1CCN(CC1)C)C(=O)Nc2cccc(c2)c3cccc(c3)c4[nH]c5ccc(cc5n4)F               | 6.56187 |
| 532947 | CNC(=O)Cc1ccc(cc1)C(=O)Nc2cccc(c2)c3cc(sc3)c4[nH]c5cccc5n4                  | 6.56312 |
| 533214 | CCOC(=O)c1ccc(cc1)NC(=O)Nc2ccc(cc2)c3ccc(cc3)c4[nH]c5ccc(cc5n4)C(F)(F)F     | 6.56418 |
| 534275 | Cc1cccc2c1[nH]c(n2)c3ccc(cc3)c4ccc(cc4)NC(=O)Nc5ccc(cc5)C(F)(F)F            | 6.56432 |
| 540004 | C=CCOC(=O)N1CCC(C1)CNCc2cccc(c2)c3ccc(s3)c4[nH]c5cccc5n4                    | 6.56497 |
| 534743 | CC(C(=O)Nc1ccc(cc1)c2ccc(cc2)c3[nH]c4ccc(cc4n3)C(F)(F)F)NC(=O)C5CCCC5       | 6.56544 |
| 542521 | CC(C)(C)OC(=O)C(CC(=O)N)NC(=O)c1ccc(cc1)c2ccc(s2)c3[nH]c4ccc(cc4n3)C(F)(F)F | 6.56739 |
| 536005 | c1cc(cc(c1)c2[nH]c3ccc(cc3n2)C(F)(F)F)c4cccc(c4)NC(=O)CNC5ccc(cc5)C(=O)N    | 6.56863 |
| 530684 | CS(=O)(=O)c1ccc(cc1)CNCc2ccc(cc2)c3ccc(s3)c4[nH]c5ccc(cc5n4)F               | 6.57172 |
| 532793 | c1cc(cc(c1)c2ccc(cc2)c3[nH]c4ccc(cc4n3)F)CN5CCCC5                           | 6.57296 |
| 537403 | c1ccc2c(c1)[nH]c(n2)c3ccc(cc3)NC(=O)c4ccc(o4)c5cccc(c5)N(=O)=O              | 6.57407 |
| 538804 | Cc1cccc2c1[nH]c(n2)c3cccc(c3)c4cccc(c4)NC(=O)c5c(nns5)C                     | 6.57417 |

|        |                                                                          |         |
|--------|--------------------------------------------------------------------------|---------|
| 526866 | c1ccc(cc1)CNCc2ccc(cc2)c3cccc(c3)c4[nH]c5ccc(cc5n4)F                     | 6.57558 |
| 537377 | CC(C)NCc1ccc(cc1)c2ccc(cc2)c3[nH]c4ccc(cc4n3)C(F)(F)F                    | 6.57586 |
| 543114 | Cc1cccc2c1[nH]c(n2)c3cccc(c3)c4ccc(cc4)NC(=O)c5ccc(nc5)NC(=O)C           | 6.5773  |
| 532242 | c1ccc(cc1)CNC(=O)Nc2cccc(c2)c3cccc(c3)c4[nH]c5ccc(cc5n4)C(F)(F)F         | 6.57824 |
| 529214 | Cc1cccc2c1[nH]c(n2)c3ccc(s3)c4cccc(c4)CNCc5ccc(cc5)OC                    | 6.5804  |
| 534808 | Cc1c(c(on1)C)c2cccc(c2)CNCc3cccc(c3)c4cc(sc4)c5[nH]c6cccc6n5             | 6.58062 |
| 537042 | CC(C)NCc1ccc(cc1)c2cccc(c2)c3[nH]c4ccc(cc4n3)C(F)(F)F                    | 6.582   |
| 527262 | Cn1c(ccn1)C(=O)NCCNCc2cccc(c2)c3cccc(c3)c4[nH]c5ccc(cc5n4)F              | 6.58345 |
| 538104 | c1cc(ccc1)c2ccc(cc2)c3[nH]c4ccc(cc4n3)C(F)(F)F)CNCc5ccc(cc5)CN           | 6.58348 |
| 525987 | COC(=O)c1cccc(c1)CNCc2ccc(cc2)c3cccc(c3)c4[nH]c5cccc5n4                  | 6.5838  |
| 542457 | CC(=O)Nc1ncc(s1)C(=O)Nc2ccc(cc2)c3cccc(c3)c4[nH]c5ccc(cc5n4)C(F)(F)F     | 6.58478 |
| 538493 | Cc1cccc2c1[nH]c(n2)c3cccc(c3)c4ccc(cc4)CNCc5cccc(c5)N                    | 6.5857  |
| 534329 | c1cc(ccc1)NC(=O)Nc2ccc(c(c2F)F)F)c3ccc(cc3)c4[nH]c5ccc(cc5n4)C(F)(F)F    | 6.58662 |
| 530833 | Cc1cccc2c1[nH]c(n2)c3cccc(c3)c4cccc(c4)NC(=O)c5c[nH]cn5                  | 6.58773 |
| 535441 | c1ccc2c(c1)[nH]c(n2)c3cc(cs3)c4cccc(c4)CNCCc5ccncc5                      | 6.58868 |
| 538374 | COC(=O)c1cccc(c1)CNCc2cccc(c2)c3ccc(cc3)c4[nH]c5ccc(cc5n4)C(F)(F)F       | 6.59083 |
| 530744 | c1ccc2c(c1)[nH]c(n2)c3cc(cs3)c4cccc(c4)NC(=O)c5ccncc5                    | 6.5923  |
| 530608 | C=CCOC(=O)N1CCC(C1)CNCc2ccc(cc2)c3cccc(c3)c4[nH]c5cccc5n4                | 6.59419 |
| 529018 | c1ccc2c(c1)[nH]c(n2)c3cccc(c3)c4ccc(cc4)NC(=O)Nc5ccc6c(c5)OCO6           | 6.59478 |
| 532253 | c1ccc2c(c1)[nH]c(n2)c3ccc(cc3)NC(=O)c4ccc(s4)N(=O)=O                     | 6.59884 |
| 539469 | c1cc(ccc1)CN2CCN(CC2)c3ccncc3)c4ccc(cc4)c5[nH]c6ccc(cc6n5)F              | 6.60033 |
| 542991 | Cc1cccc2c1[nH]c(n2)c3ccc(cc3)c4cccc(c4)CNCC5CCN(C5)C(=O)OCC=C            | 6.60037 |
| 535094 | c1cc(ccc1)c2ccc(cc2)c3[nH]c4ccc(cc4n3)C(F)(F)F)CNCC5CCCO5                | 6.60164 |
| 539753 | c1cc(ccc1)c2[nH]c3ccc(cc3n2)F)c4cccc(c4)NC(=O)c5cccc(c5)C(=O)N           | 6.60319 |
| 538579 | COc1ccc(cc1)CNCc2ccc(cc2)c3ccc(cc3)c4[nH]c5ccc(cc5n4)F                   | 6.60376 |
| 535462 | Cc1cccc2c1[nH]c(n2)c3ccc(s3)c4cccc(c4)CNCC5CCN(C5)C(=O)OCC=C             | 6.60528 |
| 541473 | CC(CN(C)C)C(=O)Nc1cccc(c1)c2ccc(cc2)c3[nH]c4ccc(cc4n3)C(F)(F)F           | 6.60533 |
| 532256 | c1cc(ccc1)NC(=O)Nc2cccc(c2)c3ccc(cc3)c4[nH]c5ccc(cc5n4)C(F)(F)F)C#N      | 6.60716 |
| 537824 | Cc1cccc2c1[nH]c(n2)c3ccc(cc3)c4cccc(c4)CNCc5cccc5                        | 6.60819 |
| 526285 | c1ccc2c(c1)[nH]c(n2)c3cccc(c3)c4ccc(cc4)NC(=O)Nc5ccsc5                   | 6.60892 |
| 537145 | Cc1cccc2c1[nH]c(n2)c3ccc(s3)c4ccc(cc4)CN5CCN(CC5)CCN6CCOCC6              | 6.61151 |
| 525458 | c1cc(ccc1)NC(=O)CCc2c[nH]cn2)c3ccc(cc3)c4[nH]c5ccc(cc5n4)F               | 6.61289 |
| 541469 | CC(=O)Nc1ccc(cc1)c2[nH]c3ccc(cc3n2)c4[nH]c5ccc(cc5n4)NC(=O)C             | 6.61624 |
| 529013 | c1cc(ccc1)c2[nH]c3ccc(cc3n2)c4ccc5c(c4)[nH]c6ccc(cc6)Cl)Cl               | 6.61774 |
| 527411 | COc1ccc(cc1)CNCc2ccc(cc2)c3ccc(cc3)c4[nH]c5cccc5n4                       | 6.61876 |
| 524474 | Cc1cccc2c1[nH]c(n2)c3ccc(cc3)c4ccc(cc4)CNCc5cccc(c5)c6c(noc6)C           | 6.62113 |
| 540237 | CC(=O)N1CCC(CC1)C(=O)Nc2ccc(cc2)c3cccc(c3)c4[nH]c5ccc(cc5n4)C(F)(F)F     | 6.62199 |
| 525673 | c1cc(ccc1)c2[nH]c3ccc(cc3n2)C(F)(F)F)c4cccc(c4)NC(=O)c5csnn5             | 6.62334 |
| 542885 | CC(=O)Nc1ccc(cc1)C(=O)Nc2ccc(cc2)c3cccc(c3)c4[nH]c5cccc5n4               | 6.62361 |
| 528131 | c1ccc2c(c1)[nH]c(n2)c3ccc(cc3)c4cccc(c4)NC(=O)Nc5ccc(c(c5F)F)F           | 6.62393 |
| 525899 | COC(=O)c1cccc(c1)CNCc2ccc(cc2)c3ccc(cc3)c4[nH]c5ccc(cc5n4)F              | 6.62553 |
| 530584 | Cc1cccc2c1[nH]c(n2)c3ccc(cc3)c4cccc(c4)CNCc5ccc(cc5)OC                   | 6.62586 |
| 527277 | Cc1cccc2c1[nH]c(n2)c3cccc(c3)c4ccc(cc4)NC(=O)NCc5cccc(c5)F               | 6.62617 |
| 531894 | CS(=O)(=O)c1cccc1)CNC(=O)c2ccc(cc2)c3ccc(s3)c4[nH]c5ccc(cc5n4)C(F)(F)F   | 6.62664 |
| 542414 | c1ccc2c(c1)[nH]c(n2)c3cccc(c3)c4cccc(c4)CN5CCN(CC5)CCN6CCOCC6            | 6.62668 |
| 529246 | CC(=O)N(C)c1cccc(c1)C(=O)Nc2cccc(c2)c3cccc(c3)c4[nH]c5ccc(cc5n4)C(F)(F)F | 6.62682 |
| 538786 | c1cc(cnc1)CCNCc2ccc(cc2)c3ccc(s3)c4[nH]c5ccc(cc5n4)F                     | 6.62742 |
| 532491 | Cc1cccc2c1[nH]c(n2)c3cccc(c3)c4cccc(c4)NC(=O)Nc5ccc(cc5)Cl               | 6.62769 |
| 527059 | Cc1cccc2c1[nH]c(n2)c3cccc(c3)c4cccc(c4)NC(=O)c5ccncc5                    | 6.62769 |
| 539557 | Cc1c(snn1)C(=O)Nc2cccc(c2)c3cccc(c3)c4[nH]c5ccc(cc5n4)C(F)(F)F           | 6.62834 |
| 530404 | CCOC1cc(ccc1OCC)OCC)C(=O)Nc2ccc(cc2)c3[nH]c4cccc4n3                      | 6.63098 |
| 534407 | Cn1cncc1)CNCc2ccc(cc2)c3cccc(c3)c4[nH]c5cccc5n4                          | 6.63157 |
| 525455 | CC(=O)Nc1ccc(cc1)C(=O)Nc2cccc(c2)c3ccc(s3)c4[nH]c5ccc(cc5n4)F            | 6.6331  |
| 541248 | c1ccc2c(c1)c(=O)cc([nH]2)C(=O)Nc3cccc(c3)c4cc(sc4)c5[nH]c6cccc6n5        | 6.6336  |
| 541269 | Cc1cccc2c1[nH]c(n2)c3ccc(cc3)c4cccc(c4)NC(=O)c5csc(n5)NC(=O)C            | 6.63425 |
| 530305 | Cc1cccc2c1[nH]c(n2)c3cccc(c3)c4ccc(cc4)NC(=O)c5csc(n5)NC(=O)C            | 6.63435 |
| 529589 | Cc1cccc2c1[nH]c(n2)c3cccc(c3)c4ccc(cc4)NC(=O)NCc5cccc5                   | 6.63565 |
| 542346 | c1ccc(cc1)NC(=O)Nc2cccc(c2)c3ccc(cc3)c4[nH]c5ccc(cc5n4)C(F)(F)F          | 6.63589 |
| 533915 | CC(=O)Nc1ccc(cc1)C(=O)Nc2ccc(cc2)c3cccc(c3)c4[nH]c5ccc(cc5n4)F           | 6.63593 |
| 527291 | CC(C)NCc1ccc(cc1)c2cccc(c2)c3[nH]c4cccc4n3                               | 6.63614 |
| 528495 | CC(=O)Nc1ccc(cc1)C(=O)Nc2cccc(c2)c3ccc(cc3)c4[nH]c5ccc(cc5n4)C(F)(F)F    | 6.63656 |

|        |                                                                         |         |
|--------|-------------------------------------------------------------------------|---------|
| 533713 | Cc1cccc2c1[nH]c(n2)c3ccc(cc3)c4ccc(cc4)CN5CCN(CC5)CCN6CCOCC6            | 6.63667 |
| 527878 | Cc1cccc2c1[nH]c(n2)c3ccc(s3)c4cccc(c4)CNC(C)C                           | 6.6372  |
| 541550 | c1ccc2c(c1)[nH]c(n2)c3cc(s3)c4cccc(c4)NC(=O)c5ccccc5                    | 6.6383  |
| 539976 | C=CCOC(=O)N1CCC(C1)CNCc2ccc(cc2)c3ccc(s3)c4[nH]c5ccccc5n4               | 6.64064 |
| 529541 | c1cc(cc(c1)c2[nH]c3ccc(cc3n2)C(F)(F)F)c4cccc(c4)NC(=O)c5ccc(cc5)C(=O)N  | 6.64108 |
| 534686 | Cc1cccc2c1[nH]c(n2)c3cccc(c3)c4cccc(c4)NC(=O)c5ccccc5                   | 6.64125 |
| 537701 | Cc1c(c(on1)C)c2cccc(c2)CNCc3cccc(c3)c4ccc(cc4)c5[nH]c6ccccc6n5          | 6.64134 |
| 539084 | c1cc(cc(c1)c2[nH]c3ccc(cc3n2)C(F)(F)F)c4cccc(c4)NC(=O)Nc5ccc(cc5)Cl     | 6.64457 |
| 531797 | c1cc(cc(c1)NC(=O)NCc2ccc(cc2)F)c3ccc(cc3)c4[nH]c5ccc(cc5n4)F            | 6.64548 |
| 536772 | c1cc(cc(c1)NC(=O)Nc2cccc(c2)c3ccc(c3)c4[nH]c5ccc(cc5n4)F)C#N            | 6.64702 |
| 525846 | c1cc(cc(c1)c2[nH]c3ccc(cc3n2)C(F)(F)F)c4cccc(c4)NC(=O)Cc5c[nH]cn5       | 6.64718 |
| 536972 | c1cc(cc(c1)NC(=O)Nc2cccc(c2)c3ccc(c3)c4[nH]c5ccc(cc5n4)C(F)(F)F)C#N     | 6.65021 |
| 527855 | c1ccc(cc1)CNCc2cccc(c2)c3ccc(cc3)c4[nH]c5ccc(cc5n4)C(F)(F)F             | 6.65314 |
| 533570 | Cc1cccc2c1[nH]c(n2)c3ccc(s3)c4cccc(c4)NC(=O)c5csc(n5)NC(=O)C            | 6.65409 |
| 528110 | Cc1cccc2c1[nH]c(n2)c3cccc(c3)c4ccc(cc4)NC(=O)C(C)CN(C)C                 | 6.65452 |
| 527325 | c1cc(cc(c1)c2[nH]c3ccc(cc3n2)F)c4cccc(c4)NC(=O)Nc5ccc(cc5)Cl            | 6.65662 |
| 536890 | c1ccc2c(c1)[nH]c(n2)c3ccc(cc3)NC(=O)c4cccc(c4)N(=O)=O                   | 6.65685 |
| 535926 | Cc1cccc2c1[nH]c(n2)c3cccc(c3)c4cccc(c4)NC(=O)c5ccoc5                    | 6.65913 |
| 527982 | Cn1c(ccn1)C(=O)NCCNCc2ccc(cc2)c3cccc(c3)c4[nH]c5ccc(cc5n4)F             | 6.66232 |
| 536236 | Cc1c(snn1)C(=O)Nc2cccc(c2)c3cccc(c3)c4[nH]c5ccc(cc5n4)F                 | 6.66252 |
| 531832 | c1cc(ccc1c2ccc(cc2)NC(=O)Nc3ccc(c(c3F)F)F)c4[nH]c5ccc(cc5n4)C(F)(F)F    | 6.66439 |
| 529227 | Cc1cccc2c1[nH]c(n2)c3ccc(s3)c4cccc(c4)CNCCNC(=O)c5ccnn5C                | 6.66646 |
| 528233 | Cc1cccc2c1[nH]c(n2)c3cccc(c3)c4ccc(cc4)CNCc5cccc(c5)c6c(noc6C)C         | 6.66678 |
| 535437 | Cc1ccc(cc1NC(=O)C)C(=O)Nc2cccc(c2)c3cccc(c3)c4[nH]c5ccc(cc5n4)C(F)(F)F  | 6.66707 |
| 527740 | COc1ccc(cc1)CNCc2ccc(cc2)c3cccc(c3)c4[nH]c5ccccc5n4                     | 6.67012 |
| 535141 | CC(C)NCc1ccc(cc1)c2ccc(cc2)c3[nH]c4ccc(cc4n3)F                          | 6.67103 |
| 535705 | c1cc(cc(c1)N)CNCc2ccc(cc2)c3cccc(c3)c4[nH]c5ccc(cc5n4)F                 | 6.67182 |
| 534996 | c1ccc2c(c1)[nH]c(n2)c3ccc(s3)c4ccc(cc4)CNCCc5ccccc5                     | 6.6722  |
| 538909 | Cc1c(c(on1)C)c2cccc(c2)CNCc3ccc(cc3)c4ccc(cc4)c5[nH]c6ccc(cc6n5)F       | 6.67285 |
| 525635 | CCOC(=O)c1ccc(cc1)NC(=O)Nc2cccc(c2)c3ccc(cc3)c4[nH]c5ccccc5n4           | 6.6745  |
| 530294 | CCOC(=O)c1ccc(cc1)NC(=O)Nc2cccc(c2)c3ccc(cc3)c4[nH]c5ccc(cc5n4)C(F)(F)F | 6.67454 |
| 531342 | Cc1cccc2c1[nH]c(n2)c3cccc(c3)c4ccc(cc4)NC(=O)c5cnn6c5nccc6              | 6.6747  |
| 531062 | c1cc(cc(c1)c2[nH]c3ccc(cc3n2)F)c4ccc(cc4)CN5CCN(CC5)c6ccncc6            | 6.67489 |
| 540999 | Cc1cccc2c1[nH]c(n2)c3ccc(s3)c4cccc(c4)CNCc5cccc(c5)c6c(noc6C)C          | 6.67534 |
| 529085 | c1ccc2c(c1)[nH]c(n2)c3cc(s3)c4cccc(c4)NC(=O)c5ccoc5                     | 6.67621 |
| 526651 | COC(=O)c1ccc2c(c1)[nH]c(n2)c3cc(cnc3N)c4cccc(c4)c5ccccc5                | 6.67633 |
| 541860 | Cc1cccc2c1[nH]c(n2)c3ccc(s3)c4cccc(c4)CNCc5cccc(c5)C(=O)OC              | 6.67651 |
| 532866 | CNc1ccc(cc1)CNCc2ccc(cc2)c3ccc(cc3)c4[nH]c5ccc(cc5n4)F                  | 6.67746 |
| 534132 | CC(CN(C)C)C(=O)Nc1ccc(cc1)c2cccc(c2)c3[nH]c4ccc(cc4n3)C(F)(F)F          | 6.67816 |
| 525540 | Cc1cccc2c1[nH]c(n2)c3ccc(cc3)c4ccc(cc4)CNCCc5ccccc5                     | 6.68194 |
| 531214 | Cc1cccc2c1[nH]c(n2)c3ccc(s3)c4ccc(cc4)CNCc5ccccc5                       | 6.68278 |
| 539563 | c1ccc2c(c1)[nH]c(n2)c3cccc(c3)c4ccc(cc4)CNCCCN5CCOCC5                   | 6.68308 |
| 525730 | C=CCOC(=O)N1CCC(C1)CNCc2cccc(c2)c3cccc(c3)c4[nH]c5ccc(cc5n4)F           | 6.68374 |
| 535691 | c1cc(cc(c1)c2[nH]c3ccc(cc3n2)C(F)(F)F)c4cccc(c4)NC(=O)c5c[nH]cn5        | 6.68657 |
| 537472 | CC(=O)Nc1ccc(cc1)C(=O)Nc2cccc(c2)c3ccc(cc3)c4[nH]c5ccccc5n4             | 6.68701 |
| 527894 | Cn1cncc1C(=O)Nc2cccc(c2)c3cccc(c3)c4[nH]c5ccc(cc5n4)C(F)(F)F            | 6.68863 |
| 541497 | CC(=O)Nc1ccc(cc1)C(=O)Nc2cccc(c2)c3cccc(c3)c4[nH]c5ccccc5n4             | 6.68951 |
| 539248 | Cc1cccc2c1[nH]c(n2)c3ccc(cc3)c4cccc(c4)CNCc5ccncc5                      | 6.69079 |
| 529135 | Cc1c(c(on1)C)c2cccc(c2)CNCc3cccc(c3)c4ccc(s4)c5[nH]c6cccccc6n5          | 6.69099 |
| 529365 | CNCCNCc1cccc(c1)c2cccc(c2)c3[nH]c4ccc(cc4n3)C(F)(F)F                    | 6.69318 |
| 531024 | c1ccc2c(c1)[nH]c(n2)c3ccc(s3)c4ccc(cc4)CN5CCN(CC5)c6ccncc6              | 6.69375 |
| 541342 | COc1ccc(cc1)CNCc2ccc(cc2)c3cccc(c3)c4[nH]c5ccc(cc5n4)F                  | 6.69514 |
| 534553 | c1ccc2c(c1)[nH]c(n2)c3ccc(s3)c4cccc(c4)CNCCc5ccccc5                     | 6.69528 |
| 526722 | c1cc(cc(c1)c2[nH]c3ccc(cc3n2)C(F)(F)F)c4cccc(c4)NC(=O)c5ccncc5          | 6.69606 |
| 537963 | Cc1cccc2c1[nH]c(n2)c3cccc(c3)c4cccc(c4)CN5CCN(CC5)c6ccncc6              | 6.69841 |
| 532001 | CN(C)CCN1CCN(CC1)Cc2ccc(cc2)c3cccc(c3)c4[nH]c5ccccc5n4                  | 6.70032 |
| 525175 | Cc1cccc2c1[nH]c(n2)c3cccc(c3)c4ccc(cc4)NC(=O)Nc5ccc(cc5)Cl              | 6.70078 |
| 531771 | CCOC(=O)c1ccc(cc1)NC(=O)Nc2ccc(cc2)c3ccc(s3)c4[nH]c5c(cccc5n4)C         | 6.70115 |
| 542916 | c1cc(cc(c1)c2[nH]c3ccc(cc3n2)F)c4cccc(c4)NC(=O)Nc5ccsc5                 | 6.70185 |
| 540005 | COc1ccc(cc1)CNCc2cccc(c2)c3cccc(c3)c4[nH]c5ccc(cc5n4)C(F)(F)F           | 6.70785 |
| 529185 | CN1CCC(CC1)N2CCN(CC2)Cc3cccc(c3)c4cccc(c4)c5[nH]c6cccccc6n5             | 6.71192 |

|        |                                                                       |         |
|--------|-----------------------------------------------------------------------|---------|
| 532302 | CS(=O)(=O)c1ccc(cc1)CCNCc2ccc(cc2)c3cccc(c3)c4[nH]c5cccc5n4           | 6.712   |
| 532971 | c1ccc2c(c1)[nH]c(n2)c3ccc(s3)c4ccc(cc4)NC(=O)Nc5ccc(c(c5F)F)F         | 6.71282 |
| 527967 | CC(C)NCc1cccc(c1)c2ccc(cc2)c3[nH]c4ccc(cc4n3)C(F)F                    | 6.71357 |
| 535255 | Cc1cccc2c1[nH]c(n2)c3cccc(c3)c4cccc(c4)CNCCNC(=O)c5ccnn5C             | 6.71721 |
| 526489 | c1cc(cc(c1)c2[nH]c3ccc(cc3n2)C(F)F)c4ccc(cc4)CNCCCN5CCCC5=O           | 6.71809 |
| 532464 | Cc1cccc2c1[nH]c(n2)c3ccc(cc3)c4cccc(c4)CNCc5cccc(c5)c6c(noc6C)C       | 6.71871 |
| 527041 | Cc1cccc2c1[nH]c(n2)c3ccc(cc3)c4cccc(c4)NC(=O)c5ccc(nc5)NC(=O)C        | 6.71992 |
| 542214 | CCC(C)NC(=O)Nc1ccc(cc1)c2cccc(c2)c3[nH]c4c(ccc4n3)C                   | 6.72379 |
| 535681 | Cc1cccc2c1[nH]c(n2)c3cccc(c3)c4ccc(cc4)NC(=O)Nc5cccc(c5)C#N           | 6.72755 |
| 541572 | Cn1c(ccn1)C(=O)NCCNCc2ccc(cc2)c3ccc(s3)c4[nH]c5ccc(cc5n4)C(F)F        | 6.72979 |
| 531255 | Cc1cccc2c1[nH]c(n2)c3cccc(c3)c4cccc(c4)CNCc5cccc(c5)C(=O)OC           | 6.73021 |
| 526588 | CC(=O)Nc1ncc(s1)C(=O)Nc2cccc(c2)c3cccc(c3)c4[nH]c5ccc(cc5n4)C(F)F     | 6.73337 |
| 527561 | CC(=O)Nc1nc(cs1)C(=O)Nc2ccc(cc2)c3cccc(c3)c4[nH]c5ccc(cc5n4)C(F)F     | 6.734   |
| 528589 | CN1CCCC(C1)CN2CCN(CC2)Cc3ccc(cc3)c4cccc(c4)c5[nH]c6ccc(cc6n5)F        | 6.73529 |
| 537770 | c1cc(ccc1)CN2CCC(C2)Nc3ccc(cc3)c4[nH]c5ccc(cc5n4)F                    | 6.73561 |
| 535699 | Cc1cccc2c1[nH]c(n2)c3cccc(c3)c4ccc(cc4)CNCc5ccc(cc5)S(=O)(=O)C        | 6.73576 |
| 532354 | c1cc(ccc1)CN2CCN(CC2)CCN3CCOCC3)c4ccc(cc4)c5[nH]c6ccc(cc6n5)F         | 6.73805 |
| 534062 | c1ccc2c(c1)[nH]c(n2)c3cccc(c3)c4ccc(cc4)NC(=O)Nc5ccc(c(c5F)F)F        | 6.73966 |
| 539836 | Cc1cccc2c1[nH]c(n2)c3ccc(s3)c4cccc(c4)CNC5CCN(CC5)C                   | 6.73974 |
| 536116 | CS(=O)(=O)c1ccc(cc1)CNCc2cccc(c2)c3cccc(c3)c4[nH]c5ccc(cc5n4)C(F)F    | 6.73986 |
| 534301 | Cc1cccc2c1[nH]c(n2)c3ccc(cc3)c4ccc(cc4)NC(=O)c5csc(n5)NC(=O)C         | 6.74004 |
| 540807 | Cc1c(c(on1)C)c2cccc(c2)CNCc3ccc(cc3)c4ccc(s4)c5[nH]c6ccc(cc6n5)C(F)F  | 6.74115 |
| 534020 | CC(C)NCc1ccc(cc1)c2ccc(s2)c3[nH]c4ccc(cc4n3)C(F)F                     | 6.74128 |
| 542985 | CC(=O)Nc1cccc(c1)C(=O)Nc2cccc(c2)c3ccc(cc3)c4[nH]c5cccc5n4            | 6.74281 |
| 533744 | Cc1cccc2c1[nH]c(n2)c3ccc(s3)c4ccc(cc4)CNCc5ccc(cc5)OC                 | 6.74495 |
| 526196 | CC(=O)Nc1ccc(cc1)C(=O)Nc2cccc(c2)c3ccc(s3)c4[nH]c5cccc5n4             | 6.74539 |
| 538025 | c1cc(ccc1)CN2CCCC(C2)Nc3ccc(s3)c4[nH]c5ccc(cc5n4)F                    | 6.75114 |
| 538675 | CNc1ccc(cc1)CNCc2ccc(cc2)c3ccc(s3)c4[nH]c5ccc(cc5n4)C(F)F             | 6.75119 |
| 531294 | Cc1cccc2c1[nH]c(n2)c3ccc(s3)c4ccc(cc4)NC(=O)Nc5ccc(c(c5)Cl)Cl         | 6.75325 |
| 543031 | Cc1c(c(on1)C)c2cccc(c2)CNCc3cccc(c3)c4cccc(c4)c5[nH]c6ccc(cc6n5)F     | 6.75348 |
| 530189 | Cc1cccc2c1[nH]c(n2)c3ccc(s3)c4ccc(cc4)NC(=O)Nc5ccc(c(c5F)F)F          | 6.75363 |
| 526688 | c1ccc(cc1)NC(=O)Nc2cccc(c2)c3cccc(c3)c4[nH]c5ccc(cc5n4)F              | 6.75417 |
| 530938 | Cc1cccc2c1[nH]c(n2)c3ccc(s3)c4ccc(cc4)NC(=O)Nc5ccc(cc5)OC             | 6.75609 |
| 530438 | Cc1cccc2c1[nH]c(n2)c3cccc(c3)c4ccc(cc4)NC(=O)C(C)CN5CCN(CC5)C         | 6.75657 |
| 527495 | c1cc(cc(c1)F)c2cc(c(nc2)N)c3[nH]c4ccc(cc4n3)F                         | 6.75692 |
| 542277 | CC(=O)Nc1ccc(cc1)C(=O)Nc2cccc(c2)c3ccc(cc3)c4[nH]c5ccc(cc5n4)F        | 6.75981 |
| 532355 | c1ccc2c(c1)[nH]c(n2)c3cccc(c3)c4ccc(cc4)CNCc5c[nH]c6c5cc(cc6)F        | 6.76019 |
| 530038 | COc1ccc(cc1)CNCc2ccc(cc2)c3ccc(s3)c4[nH]c5ccc(cc5n4)C(F)F             | 6.76032 |
| 537032 | CN1CCC(CC1)N2CCN(CC2)Cc3ccc(cc3)c4cccc(c4)c5[nH]c6ccc(cc6n5)F         | 6.76075 |
| 537009 | Cc1c(c(on1)C)c2cccc(c2)CNCc3ccc(cc3)c4ccc(cc4)c5[nH]c6ccc(cc6n5)C(F)F | 6.76325 |
| 534359 | COC(=O)c1cccc(c1)CNCc2cccc(c2)c3cccc(c3)c4[nH]c5ccc(cc5n4)C(F)F       | 6.7642  |
| 538885 | c1cc(cc(c1)N)CNCc2ccc(cc2)c3cccc(c3)c4[nH]c5ccc(cc5n4)C(F)F           | 6.76437 |
| 541148 | CC(=O)Nc1nc(cs1)C(=O)Nc2cccc(c2)c3cccc(c3)c4[nH]c5cccc5n4             | 6.76477 |
| 542762 | Cn1c(ccn1)C(=O)NCCNCc2cccc(c2)c3cccc(c3)c4[nH]c5ccc(cc5n4)C(F)F       | 6.76507 |
| 526288 | COc1ccc(cc1)NC(=O)Nc2cccc(c2)c3cccc(c3)c4[nH]c5ccc(cc5n4)F            | 6.76619 |
| 528509 | Cc1cccc2c1[nH]c(n2)c3ccc(cc3)c4ccc(cc4)NC(=O)Nc5ccsc5                 | 6.76673 |
| 540226 | Cc1cccc2c1[nH]c(n2)c3cccc(c3)c4cccc(c4)NC(=O)Nc5ccsc5                 | 6.76997 |
| 528944 | c1cc(cc(c1)c2ccc(s2)c3[nH]c4ccc(cc4n3)C(F)F)CNCc5ccncc5               | 6.7702  |
| 535188 | c1cc(cc(c1)c2cccc(c2)c3[nH]c4ccc(cc4n3)F)CNCc5ccncc5                  | 6.77029 |
| 541776 | Cc1cccc2c1[nH]c(n2)c3cccc(c3)c4ccc(cc4)NC(=O)Nc5ccc(c(c5F)F)F         | 6.77559 |
| 528159 | c1ccc2c(c1)[nH]c(n2)c3cccc(c3)c4cccc(c4)NC(=O)Nc5ccc6c(c5)OCO6        | 6.77716 |
| 531054 | Cc1cccc2c1[nH]c(n2)c3cccc(c3)c4cccc(c4)NC(=O)c5cnnc5C                 | 6.77762 |
| 541402 | Cc1cccc2c1[nH]c(n2)c3cccc(c3)c4ccc(cc4)CNCCNC(=O)c5ccnn5C             | 6.77784 |
| 541677 | CNc1ccc(cc1)CNCc2ccc(cc2)c3ccc(cc3)c4[nH]c5ccc(cc5n4)C(F)F            | 6.77844 |
| 538038 | Cc1c(c(on1)C)c2cccc(c2)CNCc3cccc(c3)c4ccc(s4)c5[nH]c6ccc(cc6n5)C(F)F  | 6.77936 |
| 539841 | c1ccc2c(c1)[nH]c(n2)c3ccc(cc3)c4cccc(c4)NC(=O)Nc5ccc(cc5)F            | 6.78215 |
| 535975 | c1ccc2c(c1)[nH]c(n2)c3ccc(s3)c4ccc(cc4)NC(=O)Nc5ccc(c(c5)Cl)Cl        | 6.78297 |
| 529390 | c1ccc2c(c1)[nH]c(n2)c3cccc(c3)c4ccc(cc4)CNCc5ccncc5                   | 6.78388 |
| 529926 | c1ccc2c(c1)[nH]c(n2)c3ccc(cc3)c4ccc(cc4)CN5CCN(CC5)c6ccncc6           | 6.78556 |
| 534974 | c1ccc(cc1)CNCc2ccc(cc2)c3cccc(c3)c4[nH]c5ccc(cc5n4)C(F)F              | 6.78695 |
| 528357 | Cc1cccc2c1[nH]c(n2)c3ccc(cc3)c4ccc(cc4)CN5CCN(CC5)c6ccncc6            | 6.78755 |



|        |                                                                       |         |
|--------|-----------------------------------------------------------------------|---------|
| 531419 | c1cc(ccc1)c2[nH]c3ccc(cc3n2)F)c4ccc(cc4)CN5CCCCC5                     | 6.78803 |
| 538498 | Cc1cccc2c1[nH]c(n2)c3cccc(c3)c4ccc(cc4)NC(=O)COc5ccccc5C(=O)N         | 6.79363 |
| 528512 | c1cc(ccc1)c2ccc(cc2)c3[nH]c4ccc(cc4n3)C(F)(F)F)CN5CCN(CC5)CCN6CCOCC6  | 6.79626 |
| 540781 | c1ccc2c(c1)[nH]c(n2)c3ccc(s3)c4ccc(cc4)CNCCc5ccncc5                   | 6.80033 |
| 537645 | c1cc(ccc1)CNCC2CCCO2)c3ccc(s3)c4[nH]c5ccc(cc5n4)C(F)(F)F              | 6.80064 |
| 536078 | Cc1cccc2c1[nH]c(n2)c3ccc(s3)c4ccc(cc4)NC(=O)Nc5ccccc5OC               | 6.80065 |
| 537132 | c1ccc2c(c1)[nH]c(n2)c3cccc(c3)c4ccc(cc4)CNCc5ccc(cc5)c6csnn6          | 6.80111 |
| 534607 | c1cc(ccc1)c2cccc(c2)c3[nH]c4ccc(cc4n3)C(F)(F)F)CN5CCN(CC5)c6ccncc6    | 6.80148 |
| 540642 | c1ccc2c(c1)[nH]c(n2)c3ccc(cc3)c4ccc(cc4)CN5CCN(CC5)CCN6CCOCC6         | 6.80265 |
| 538126 | c1cc(ccc1)CN)CNCc2ccc(cc2)c3ccc(s3)c4[nH]c5ccc(cc5n4)C(F)(F)F         | 6.80332 |
| 525957 | c1ccc2c(c1)[nH]c(n2)c3cccc(c3)c4ccc(cc4)NC(=O)Nc5ccc(cc5)Cl           | 6.80365 |
| 529229 | CN1CCCC(C1)CN2CCN(CC2)Cc3cccc(c3)c4ccc(cc4)c5[nH]c6cccc6n5            | 6.80367 |
| 542807 | COC(=O)c1cccc(c1)CNCc2ccc(cc2)c3ccc(s3)c4[nH]c5ccc(cc5n4)C(F)(F)F     | 6.80531 |
| 529967 | CN1CCC(CC1)N2CCN(CC2)Cc3cccc(c3)c4ccc(cc4)c5[nH]c6cccc6n5             | 6.80654 |
| 536892 | c1ccc2c(c1)[nH]c(n2)c3cccc(c3)c4ccc(cc4)CNCc5ccsc5                    | 6.80717 |
| 527439 | CS(=O)(=O)c1ccc(cc1)CNCc2ccc(cc2)c3ccc(s3)c4[nH]c5ccc(cc5n4)C(F)(F)F  | 6.80797 |
| 536017 | COC(=O)c1cccc(c1)CNCc2ccc(cc2)c3cccc(c3)c4[nH]c5ccc(cc5n4)C(F)(F)F    | 6.80813 |
| 542328 | Cc1cccc2c1[nH]c(n2)c3ccc(s3)c4cccc(c4)CN5CCN(CC5)CCN6CCOCC6           | 6.81395 |
| 527081 | c1cc(ccc1)c2ccc(cc2)c3[nH]c4ccc(cc4n3)C(F)(F)F)CN5CCC(CC5)CCN6CCCCC6  | 6.81476 |
| 540042 | c1cc(ccc1)CN2CCN(CC2)c3ccncc3)c4ccc(s4)c5[nH]c6ccc(cc6n5)C(F)(F)F     | 6.81491 |
| 532401 | c1ccc2c(c1)[nH]c(n2)c3ccc(s3)c4ccc(cc4)CN5CCC(CC5)N6CCCCC6            | 6.8161  |
| 542514 | c1ccc(cc1)CNCc2cccc(c2)c3ccc(s3)c4[nH]c5ccc(cc5n4)C(F)(F)F            | 6.81616 |
| 538231 | c1ccc2c(c1)[nH]c(n2)c3ccc(cc3)c4cccc(c4)CN5CCN(CC5)c6ccncc6           | 6.81635 |
| 531998 | CN1CCC(CC1)N2CCN(CC2)Cc3ccc(cc3)c4ccc(cc4)c5[nH]c6ccc(cc6n5)F         | 6.81655 |
| 533556 | Cc1cccc2c1[nH]c(n2)c3ccc(s3)c4ccc(cc4)NC(=O)Nc5ccc(cc5)Cl             | 6.81831 |
| 534971 | c1ccc2c(c1)[nH]c(n2)c3cc(c3)c4ccc(cc4)NC(=O)Nc5cccc(c5)C#N            | 6.81846 |
| 537672 | c1ccc2c(c1)[nH]c(n2)c3cccc(c3)NC(=O)c4ccc(o4)c5cccc(c5)N(=O)=O        | 6.8202  |
| 526200 | Cn1c(ccn1)C(=O)NCCNCc2cccc(c2)c3ccc(s3)c4[nH]c5ccc(cc5n4)C(F)(F)F     | 6.82051 |
| 530057 | COc1ccc(cc1)CNCc2ccc(cc2)c3cccc(c3)c4[nH]c5ccc(cc5n4)C(F)(F)F         | 6.8222  |
| 528204 | C=CCOC(=O)N1CCC(C1)CNCc2ccc(cc2)c3ccc(cc3)c4[nH]c5ccc(cc5n4)C(F)(F)F  | 6.8226  |
| 538987 | CC(=O)Nc1nc(cs1)C(=O)Nc2ccc(cc2)c3ccc(cc3)c4[nH]c5ccccc5n4            | 6.82317 |
| 536002 | c1cc(ccc1)c2[nH]c3ccc(cc3n2)C(F)(F)F)c4ccc(cc4)NC(=O)Nc5ccsc5         | 6.82514 |
| 542720 | CN1CCCC(C1)CN2CCN(CC2)Cc3cccc(c3)c4ccc(s4)c5[nH]c6cccc6n5             | 6.82665 |
| 534056 | c1ccc2c(c1)[nH]c(n2)c3ccc(s3)c4cccc(c4)CN5CCN(CC5)c6ccncc6            | 6.82851 |
| 530009 | CC(=O)Nc1cccc(c1)C(=O)Nc2ccc(cc2)c3cccc(c3)c4[nH]c5ccc(cc5n4)C(F)(F)F | 6.82907 |
| 526939 | Cc1cccc2c1[nH]c(n2)c3cccc(c3)c4ccc(cc4)CNCc5ccccc5                    | 6.83095 |
| 528154 | c1ccc2c(c1)[nH]c(n2)c3ccc(cc3)c4ccc(cc4)CN5CCC(C5)N                   | 6.83191 |
| 525333 | c1cc(ccc1)CN2CCN(CC2)CCN3CCOCC3)c4ccc(s4)c5[nH]c6ccc(cc6n5)F          | 6.834   |
| 530778 | C=CCOC(=O)N1CCC(C1)CNCc2cccc(c2)c3ccc(cc3)c4[nH]c5ccc(cc5n4)C(F)(F)F  | 6.83473 |
| 537431 | Cc1cccc2c1[nH]c(n2)c3ccc(cc3)c4cccc(c4)NC(=O)NCCc5ccc(cc5)F           | 6.83562 |
| 529752 | c1ccc2c(c1)[nH]c(n2)c3ccc(cc3)c4cccc(c4)CNCCc5ccncc5                  | 6.83577 |
| 542624 | c1ccc2c(c1)[nH]c(n2)c3cccc(c3)c4cccc(c4)CNCc5ccncc5                   | 6.83605 |
| 539878 | CN1CCCC(C1)CN2CCN(CC2)Cc3cccc(c3)c4ccc(cc4)c5[nH]c6ccc(cc6n5)C(F)(F)F | 6.83766 |
| 526467 | c1cc(ccc1)c2cccc(c2)c3[nH]c4ccc(cc4n3)F)CN5CCN(CC5)c6ccncc6           | 6.83768 |
| 529284 | Cn1c(ccn1)C(=O)NCCNCc2ccc(cc2)c3ccc(cc3)c4[nH]c5ccc(cc5n4)C(F)(F)F    | 6.83794 |
| 528992 | Cc1cccc2c1[nH]c(n2)c3cccc(c3)c4ccc(cc4)NC(=O)Nc5ccc6c(c5)OCO6         | 6.83872 |
| 541741 | CN1CCC(CC1)N2CCN(CC2)Cc3ccc(cc3)c4cccc(c4)c5[nH]c6cccc6n5             | 6.83896 |
| 539378 | c1cc(ccc1)c2ccc(cc2)c3[nH]c4ccc(cc4n3)F)CN5CCN(CC5)CCN6CCOCC6         | 6.83943 |
| 533143 | CCOC(=O)c1ccc(cc1)NC(=O)Nc2ccc(cc2)c3cccc(c3)c4[nH]c5ccccc5n4         | 6.83975 |
| 528949 | CCOC(=O)c1ccc(cc1)NC(=O)Nc2ccc(cc2)c3cccc(c3)c4[nH]c5c(cccc5n4)C      | 6.83982 |
| 539321 | c1cc(ccc1)NC(=O)Nc2ccc(cc2)c3ccc(cc3)c4[nH]c5ccc(cc5n4)C(F)(F)F)C#N   | 6.83993 |
| 525820 | Cc1cccc2c1[nH]c(n2)c3ccc(s3)c4ccc(cc4)CN5CCN(CC5)C6CCN(CC6)C          | 6.84008 |
| 534339 | Cc1cccc2c1[nH]c(n2)c3ccc(cc3)c4ccc(cc4)CN5CCN(CC5)CC6CCN(CC6)C        | 6.8412  |
| 532573 | c1cc(ccc1)c2ccc(cc2)c3[nH]c4ccc(cc4n3)C(F)(F)F)CN5CCCCC5              | 6.84159 |
| 534273 | Cc1cccc2c1[nH]c(n2)c3ccc(cc3)c4ccc(cc4)CN5CCC(CC5)CCN6CCCCC6          | 6.84224 |
| 534538 | CCOC(=O)c1ccc(cc1)NC(=O)Nc2cccc(c2)c3ccc(s3)c4[nH]c5c(cccc5n4)C       | 6.84284 |
| 534276 | c1ccc(cc1)CNCc2ccc(cc2)c3ccc(cc3)c4[nH]c5ccc(cc5n4)C(F)(F)F           | 6.84502 |
| 536574 | Cc1cccc2c1[nH]c(n2)c3cccc(c3)c4ccc(cc4)NC(=O)Nc5ccc(cc5)OC            | 6.84631 |
| 536397 | c1cc(ccc1)CNCc2ccncc2)c3ccc(cc3)c4[nH]c5ccc(cc5n4)F                   | 6.84641 |
| 536852 | Cc1cccc2c1[nH]c(n2)c3ccc(s3)c4ccc(cc4)CN5CCN(CC5)CC6CCCN(CC6)C        | 6.84649 |
| 539924 | c1cc(ccc1)CNCc2ccncc2)c3ccc(s3)c4[nH]c5ccc(cc5n4)F                    | 6.84722 |

|        |                                                                        |         |
|--------|------------------------------------------------------------------------|---------|
| 531982 | c1cc(ccc1CN2CCC(CC2)CCN3CCCCC3)c4ccc(s4)c5[nH]c6ccc(cc6n5)F            | 6.8474  |
| 528434 | c1cc(cc(c1)c2[nH]c3ccc(cc3n2)F)c4ccc(cc4)CN5CCC(CC5)CCN6CCCCC6         | 6.84766 |
| 525892 | c1ccc2c(c1)[nH]c(n2)c3cc(cs3)c4cccc(c4)CN5CCC(CC5)CCN6CCCCC6           | 6.84773 |
| 526716 | CN1CCC(CC1)NCc2cccc(c2)c3cccc(c3)c4[nH]c5ccc(cc5n4)C(F)(F)F            | 6.84794 |
| 540815 | c1cc(cc(c1)c2cccc(c2)c3[nH]c4ccc(cc4n3)C(F)(F)F)CNCCc5ccncc5           | 6.85015 |
| 532159 | CN1CCCC(C1)CN2CCN(CC2)Cc3ccc(cc3)c4ccc(cc4)c5[nH]c6cccccc6n5           | 6.85221 |
| 535063 | CN1CCC(CC1)N2CCN(CC2)Cc3ccc(cc3)c4ccc(s4)c5[nH]c6cccccc6n5             | 6.85249 |
| 527170 | Cc1cccc2c1[nH]c(n2)c3cccc(c3)c4cccc(c4)CN5CCC(CC5)CCN6CCCCC6           | 6.85249 |
| 541519 | c1ccc2c(c1)[nH]c(n2)c3cccc(c3)c4ccc(cc4)CN5CCN(CC5)c6ccncc6            | 6.8528  |
| 537772 | C=CCOC(=O)N1CCC(C1)CNCc2ccc(cc2)c3cccc(c3)c4[nH]c5ccc(cc5n4)F          | 6.85335 |
| 542148 | CN1CCC(CC1)N2CCN(CC2)Cc3cccc(c3)c4ccc(cc4)c5[nH]c6ccc(cc6n5)C(F)(F)F   | 6.85392 |
| 538993 | c1ccc2c(c1)[nH]c(n2)c3cccc(c3)c4cccc(c4)CN5CCC(CC5)CCN6CCCCC6          | 6.85398 |
| 542561 | c1ccc2c(c1)[nH]c(n2)c3cccc(c3)c4ccc(cc4)CNCCc5ccncc5                   | 6.85599 |
| 536348 | Cc1cccc2c1[nH]c(n2)c3cccc(c3)c4ccc(cc4)CNCCc5ccncc5                    | 6.85638 |
| 533056 | CN1CCCC(C1)CN2CCN(CC2)Cc3cccc(c3)c4cccc(c4)c5[nH]c6cccccc6n5           | 6.85649 |
| 531097 | c1cc(cc(c1)NC(=O)Nc2ccc(c(c2)Cl)Cl)c3ccc(cc3)c4[nH]c5ccc(cc5n4)F       | 6.85658 |
| 539092 | Cc1cccc2c1[nH]c(n2)c3cccc(c3)c4cccc(c4)NC(=O)Nc5ccccc5                 | 6.85763 |
| 536694 | CN1CCCC(C1)CN2CCN(CC2)Cc3cccc(c3)c4ccc(cc4)c5[nH]c6ccc(cc6n5)F         | 6.85828 |
| 529833 | Cc1cccc2c1[nH]c(n2)c3ccc(s3)c4cccc(c4)CNCc5ccncc5                      | 6.85915 |
| 537934 | CS(=O)(=O)c1ccc(cc1)CNCc2ccc(cc2)c3cccc(c3)c4[nH]c5ccc(cc5n4)C(F)(F)F  | 6.85993 |
| 541380 | Cn1c(ccn1)C(=O)NCCNCc2ccc(cc2)c3cccc(c3)c4[nH]c5cccccc5n4              | 6.86253 |
| 540902 | c1cc(cc(c1)c2[nH]c3ccc(cc3n2)F)c4ccc(cc4)NC(=O)Nc5ccc6c(c5)OCO6        | 6.86464 |
| 537539 | c1cc(cc(c1)c2ccc(cc2)c3[nH]c4ccc(cc4n3)F)CN5CCC(CC5)CCN6CCCCC6         | 6.86775 |
| 528569 | COc1ccc(cc1)CNCc2ccc(cc2)c3ccc(cc3)c4[nH]c5ccc(cc5n4)C(F)(F)F          | 6.87089 |
| 529493 | Cc1cccc2c1[nH]c(n2)c3cccc(c3)c4cccc(c4)CNCCc5ccc(cc5)OC                | 6.87174 |
| 537913 | CC(=O)Nc1ccc(cc1)C(=O)Nc2cccc(c2)c3cccc(c3)c4[nH]c5ccc(cc5n4)F         | 6.87333 |
| 525940 | CN1CCCC(C1)CN2CCN(CC2)Cc3ccc(cc3)c4ccc(s4)c5[nH]c6cccccc6n5            | 6.87649 |
| 528312 | c1ccc2c(c1)[nH]c(n2)c3cc(cs3)c4cccc(c4)NC(=O)c5cccc(c5)C(=O)N          | 6.87663 |
| 530320 | c1cc(cc(c1)c2[nH]c3ccc(cc3n2)C(F)(F)F)c4cccc(c4)NC(=O)CCc5c[nH]cn5     | 6.87866 |
| 542322 | CN1CCCC(C1)CN2CCN(CC2)Cc3ccc(cc3)c4cccc(c4)c5[nH]c6cccccc6n5           | 6.88003 |
| 537689 | c1ccc2c(c1)[nH]c(n2)c3cccc(c3)c4cccc(c4)NC(=O)Nc5ccc(cc5)Cl            | 6.88136 |
| 526594 | c1ccc2c(c1)[nH]c(n2)c3ccc(cc3)c4ccc(cc4)CN5CCN(CC5)CCN6CCOCC6          | 6.88274 |
| 541892 | c1ccc2c(c1)[nH]c(n2)c3cccc(c3)c4cccc(c4)NC(=O)Nc5ccc(c(c5)Cl)Cl        | 6.88293 |
| 526125 | Cc1cccc2c1[nH]c(n2)c3cccc(c3)c4ccc(cc4)CNCc5ccc(cc5)OC                 | 6.88645 |
| 525152 | c1cc(ccc1CN2CCC(CC2)CCN3CCCCC3)c4ccc(cc4)c5[nH]c6ccc(cc6n5)F           | 6.88821 |
| 542759 | COC(=O)c1cccc(c1)CNCc2cccc(c2)c3cccc(c3)c4[nH]c5ccc(cc5n4)F            | 6.88921 |
| 534434 | c1cc(ccc1)CNCc2ccncc2)c3ccc(cc3)c4[nH]c5ccc(cc5n4)C(F)(F)F             | 6.89032 |
| 532616 | CN1CCCC(C1)CN2CCN(CC2)Cc3ccc(cc3)c4ccc(s4)c5[nH]c6ccc(cc6n5)F          | 6.89768 |
| 532101 | Cc1cccc2c1[nH]c(n2)c3ccc(s3)c4cccc(c4)CN5CCN(CC5)c6ccncc6              | 6.89849 |
| 535654 | Cc1cccc2c1[nH]c(n2)c3cccc(c3)c4cccc(c4)CN5CCN(CC5)c6ccncc6             | 6.89911 |
| 526595 | c1cc(cc(c1)c2[nH]c3ccc(cc3n2)C(F)(F)F)c4cccc(c4)NC(=O)c5cccc(c5)C(=O)N | 6.89915 |
| 531606 | COc1ccc(cc1)CNCc2cccc(c2)c3ccc(cc3)c4[nH]c5ccc(cc5n4)C(F)(F)F          | 6.89942 |
| 537593 | CC(=O)Nc1ccc(cc1)C(=O)Nc2cccc(c2)c3ccc(s3)c4[nH]c5ccc(cc5n4)C(F)(F)F   | 6.89965 |
| 527255 | CN1CCC(CC1)NCc2ccc(cc2)c3cccc(c3)c4[nH]c5cccccc5n4                     | 6.90091 |
| 534506 | CCOC(=O)c1ccc(cc1)NC(=O)Nc2ccc(cc2)c3cccc(c3)c4[nH]c5ccc(cc5n4)F       | 6.91456 |
| 534591 | Cn1c(ccn1)C(=O)NCCNCc2cccc(c2)c3ccc(cc3)c4[nH]c5ccc(cc5n4)C(F)(F)F     | 6.9147  |
| 529501 | Cc1cccc2c1[nH]c(n2)c3ccc(s3)c4cccc(c4)CN5CCN(CC5)CC6CCCN(C6)C          | 6.91617 |
| 539215 | COc1cccc1NC(=O)Nc2cccc(c2)c3cccc(c3)c4[nH]c5ccc(cc5n4)C(F)(F)F         | 6.92165 |
| 526462 | c1cc(cc(c1)c2[nH]c3ccc(cc3n2)C(F)(F)F)c4cccc(c4)NC(=O)Nc5ccc(c(c5F)F)F | 6.92327 |
| 536488 | Cc1cccc2c1[nH]c(n2)c3cccc(c3)c4ccc(cc4)CNCCc5ccncc5                    | 6.9235  |
| 541881 | CC(=O)Nc1ccc(cc1)C(=O)Nc2cccc(c2)c3cc(sc3)c4[nH]c5cccccc5n4            | 6.92502 |
| 525435 | c1cc(cc(c1)c2ccc(cc2)c3[nH]c4ccc(cc4n3)C(F)(F)F)CN5CCN(CC5)c6ccncc6    | 6.9267  |
| 542410 | Cc1cccc2c1[nH]c(n2)c3cccc(c3)c4ccc(cc4)CNCC5CCN(C5)C(=O)OCC=C          | 6.92716 |
| 542461 | CN1CCCC(C1)CN2CCN(CC2)Cc3ccc(cc3)c4ccc(cc4)c5[nH]c6ccc(cc6n5)F         | 6.93017 |
| 526337 | Cc1cccc2c1[nH]c(n2)c3ccc(cc3)c4cccc(c4)CN5CCN(CC5)c6ccncc6             | 6.93149 |
| 528458 | Cn1c(ccn1)C(=O)NCCNCc2ccc(cc2)c3cccc(c3)c4[nH]c5ccc(cc5n4)C(F)(F)F     | 6.93173 |
| 532654 | Cc1cccc2c1[nH]c(n2)c3ccc(s3)c4ccc(cc4)NC(=O)Nc5cccc(c5)C#N             | 6.9329  |
| 529747 | c1cc(cc(c1)c2ccc(s2)c3[nH]c4ccc(cc4n3)C(F)(F)F)CNCCc5ccncc5            | 6.93296 |
| 530944 | c1ccc2c(c1)[nH]c(n2)c3cccc(c3)c4cccc(c4)NC(=O)Nc5ccsc5                 | 6.93312 |
| 537846 | Cc1cccc2c1[nH]c(n2)c3cccc(c3)c4ccc(cc4)NC(=O)Nc5ccsc5                  | 6.93379 |
| 536495 | c1cc(cc(c1)c2[nH]c3ccc(cc3n2)F)c4ccc(cc4)CNCCc5ccncc5                  | 6.93961 |

|        |                                                                       |         |
|--------|-----------------------------------------------------------------------|---------|
| 526724 | Cc1cccc2c1[nH]c(n2)c3cccc(c3)c4cccc(c4)NC(=O)c5csc(n5)NC(=O)C         | 6.93988 |
| 525386 | Cc1cccc2c1[nH]c(n2)c3ccc(cc3)c4ccc(cc4)NC(=O)Nc5cccc(c5)C#N           | 6.94286 |
| 540838 | Cc1cccc2c1[nH]c(n2)c3ccc(s3)c4ccc(cc4)CN5CCN(CC5)c6ccncc6             | 6.94371 |
| 537973 | c1ccc2c(c1)[nH]c(n2)c3cccc(c3)c4ccc(cc4)CNCCNc5ccnc5                  | 6.9452  |
| 538050 | Cc1cccc2c1[nH]c(n2)c3ccc(s3)c4ccc(cc4)NC(=O)Nc5ccsc5                  | 6.94679 |
| 540555 | c1cc(cc(c1)NC(=O)Nc2ccc(c(c2F)F)F)c3ccc(cc3)c4[nH]c5ccc(cc5n4)F       | 6.94708 |
| 541734 | CNc1ccc(cc1)CNCc2cccc(c2)c3ccc(cc3)c4[nH]c5ccc(cc5n4)C(F)(F)F         | 6.95194 |
| 534700 | CC(=O)Nc1ccc(cn1)C(=O)Nc2ccc(cc2)c3cccc(c3)c4[nH]c5ccc(cc5n4)C(F)(F)F | 6.95484 |
| 529076 | Cc1cccc2c1[nH]c(n2)c3cccc(c3)c4cccc(c4)CNCC5CCN(C5)C(=O)OCC=C         | 6.96228 |
| 530540 | Cc1cccc2c1[nH]c(n2)c3cccc(c3)c4cccc(c4)NC(=O)Nc5ccc(c(c5F)F)F         | 6.96778 |
| 533712 | CN1CCC(CC1)N2CCN(CC2)Cc3cccc(c3)c4ccc(cc4)c5[nH]c6ccc(cc6n5)F         | 6.97015 |
| 528167 | CCOC(=O)c1ccc(cc1)NC(=O)Nc2cccc(c2)c3cccc(c3)c4[nH]c5c(ccc5n4)C       | 6.97434 |
| 528663 | Cc1cccc2c1[nH]c(n2)c3cccc(c3)c4cccc(c4)NC(=O)Nc5cccc(c5)C#N           | 6.98147 |
| 528548 | Cc1cccc2c1[nH]c(n2)c3ccc(cc3)c4ccc(cc4)NC(=O)Nc5ccc(cc5)Cl            | 6.99897 |
| 536829 | Cc1cccc2c1[nH]c(n2)c3ccc(cc3)c4ccc(cc4)CN5CCN(CC5)C6CCN(CC6)C         | 6.99909 |
| 538181 | c1cc(cc(c1)c2[nH]c3ccc(cc3n2)C(F)(F)F)c4ccc(cc4)CNCCc5ccncc5          | 7.00477 |
| 538738 | c1ccc2c(c1)[nH]c(n2)c3ccc(cc3)c4ccc(cc4)NC(=O)Nc5ccc(c(c5)Cl)Cl       | 7.00504 |
| 539981 | Cc1(c(snn1)C(=O)Nc2cccc(c2)c3ccc(cc3)c4[nH]c5ccc(cc5n4)F              | 7.01684 |
| 529997 | Cc1cccc2c1[nH]c(n2)c3cccc(c3)c4cccc(c4)NC(=O)Nc5cccc5OC               | 7.019   |
| 529949 | CCOC(=O)c1ccc(cc1)NC(=O)Nc2cccc(c2)c3cccc(c3)c4[nH]c5ccc(cc5n4)F      | 7.02357 |
| 536289 | CCOC(=O)c1ccc(cc1)NC(=O)Nc2cccc(c2)c3ccc(cc3)c4[nH]c5ccc(cc5n4)F      | 7.0248  |
| 528151 | c1ccc2c(c1)[nH]c(n2)c3ccc(cc3)c4ccc(cc4)NC(=O)NCc5ccc(cc5)F           | 7.04241 |
| 527679 | c1ccc2c(c1)[nH]c(n2)c3cccc(c3)c4cccc(c4)NC(=O)Nc5cccc(c5)C#N          | 7.0446  |
| 524874 | CC(=O)Nc1nc(cs1)C(=O)Nc2cccc(c2)c3cccc(c3)c4[nH]c5ccc(cc5n4)F         | 7.04962 |
| 539883 | c1cc(cc(c1)c2[nH]c3ccc(cc3n2)F)c4cccc(c4)NC(=O)Nc5ccc(c(c5F)F)F       | 7.05033 |
| 536311 | c1cc(cc(c1)c2ccc(s2)c3[nH]c4ccc(cc4n3)C(F)(F)F)CN5CCN(CC5)CCO         | 7.06226 |
| 525334 | c1cc(cc(c1)c2ccc(cc2)c3[nH]c4ccc(cc4n3)F)CN5CCN(CC5)c6ccncc6          | 7.06679 |
| 537358 | CC(=O)Nc1ccc(cn1)C(=O)Nc2cccc(c2)c3cccc(c3)c4[nH]c5ccc(cc5n4)C(F)(F)F | 7.13271 |
| 535592 | CCOC(=O)c1ccc(cc1)NC(=O)Nc2cccc(c2)c3cccc(c3)c4[nH]c5ccccc5n4         | 7.16332 |
| 541018 | Cc1cccc2c1[nH]c(n2)c3cccc(c3)c4cccc(c4)NC(=O)c5ccc(nc5)NC(=O)C        | 7.18914 |
| 527638 | Cc1cccc2c1[nH]c(n2)c3cccc(c3)c4cccc(c4)NC(=O)C5CC(=O)Nc6c5cccc6       | 7.18984 |
| 535121 | c1cc(ccc1CN2CCN(CC2)c3ccncc3)c4ccc(cc4)c5[nH]c6ccc(cc6n5)C(F)(F)F     | 7.20511 |
| 528452 | c1ccc2c(c1)[nH]c(n2)c3cccc(c3)c4cccc(c4)NC(=O)Nc5ccc(c(c5F)F)F        | 7.25863 |
| 525530 | c1ccc2c(c1)[nH]c(n2)c3ccc(cc3)c4ccc(cc4)NC(=O)Nc5ccc(cc5)Cl           | 7.29503 |
| 541316 | c1cc(cc(c1)NC(=O)Nc2ccc(cc2)Cl)c3ccc(cc3)c4[nH]c5ccc(cc5n4)F          | 7.32324 |
| 540625 | c1cc(cnc1)c2[nH]c3cc(ccc3n2)Cl                                        | 7.41628 |
| 535843 | CC(C)(C)c1ccc2c(c1)nc([nH]2)c3ccc(cc3)C=CC(=O)NCc4ccc(c(c4)Cl)Cl      | 7.4506  |
| 529304 | CCOC(=O)c1ccc(cc1)NC(=O)Nc2ccc(cc2)c3ccc(cc3)c4[nH]c5ccccc5n4         | 7.65149 |
